# Supplementary material for: Phylogenies of the 16S rRNA gene and its hypervariable regions lack concordance with core genome phylogenies
Source: Microbiome. 2022 Jul 8;10:104. doi: 10.1186/s40168-022-01295-y (PMC9264627; doi:10.1186/s40168-022-01295-y)
Supplement: Supplementary file 3 — Additional file 2. Excel spreadsheet including all supplementary tables, titles, and legends. [file 40168_2022_1295_MOESM2_ESM.xlsx]

## Sheet: Table S1
Title:	Sequence information for genomes used in intra-genus analyses
Legend:	Genome information and assembly data regarding the 165 genomes used in our intra-genus analyses.
Species	Strain	N50	Contigs	Coverage	Assembly
Campylobacter coli	OR12	Complete Genome	Complete Genome	195x	GCA_001483845.1
Campylobacter concisus	ATCC 51562	361423	21	200.0x	GCA_000466745.1
Campylobacter corcagiensis	CIT 045	281888	21	200.0x	GCA_000597805.1
Campylobacter cuniculorum	DSM 23162	83241	46	Unknown	GCA_000621005.1
Campylobacter curvus	525.92	Complete Genome	Complete Genome		GCA_000017465.2
Campylobacter fetus	97/608	Complete Genome	Complete Genome	Unknown	GCA_000759515.1
Campylobacter gracilis	RM3268	203752	33	21x	GCA_000175875.1
Campylobacter hepaticus	HV10	110715	39	160.0x	GCA_001687475.1
Campylobacter hyointestinalis	DSM 19053	224275	26	170.0x	GCA_000705275.1
Campylobacter jejuni	269.97	Complete Genome	Complete Genome		GCA_000017485.1
Campylobacter lari	BCW_4217	130975	21	156.0x	GCA_001762205.1
Campylobacter mucosalis	DSM 21682	214630	42	170.0x	GCA_000705255.1
Campylobacter rectus	RM3267	65738	89	Unknown	GCA_000174175.1
Campylobacter showae	CSUNSWCD	209023	23	800.0x	GCA_000313615.1
Campylobacter sputorum	INTA08/209	115802	51	150.0x	GCA_000788295.1
Campylobacter upsaliensis	RM3195	153933	20	Unkown	GCA_000167395.1
Campylobacter ureolyticus	ACS-301-V-Sch3b	306603	19	263.0x	GCA_000413435.1
Clostridium acetireducens	DSM 10703	56924	85	228.93x	GCA_001758365.1
Clostridium acetobutylicum	DSM 1731	Complete Genome	Complete Genome	Unknown	GCA_000218855.1
Clostridium akagii	DSM 12554	180666	55	Unknown	GCA_000686725.1
Clostridium algidicarnis	B3	3060291	1	Unknown	GCA_000703125.1
Clostridium amylolyticum	DSM 21864	600522	21	265x	GCA_900142075.1
Clostridium arbusti	SL206	31124	243	42x	GCA_000246895.2
Clostridium argentinense	CDC 2741	418119	20	182.0x	GCA_000816675.1
Clostridium autoethanogenum	DSM 10061	Complete Genome	Complete Genome	200x	GCA_001484725.1
Clostridium baratii	Sullivan	Complete Genome	Complete Genome	44.7x	GCA_000789395.1
Clostridium beijerinckii	NCIMB 14988	Complete Genome	Complete Genome	500x	GCA_000833105.2
Clostridium bornimense	M2/40	Complete Genome	Complete Genome	100x	GCA_000577895.1
Clostridium botulinum	CDC_1632	Complete Genome	Complete Genome	319x	GCA_001889325.1
Clostridium butyricum	CDC_51208	Complete Genome	Complete Genome	319x	GCA_001886875.1
Clostridium cadaveris	NLAE-zl-G419	110120	54	356x	GCA_900113105.1
Clostridium carboxidivorans	P7	Complete Genome	Complete Genome	141x	GCA_001038625.1
Clostridium cavendishii	DSM 21758	236475	63	148x	GCA_900141845.1
Clostridium celatum	DSM 1785	55171	137	356x	GCA_000320405.1
Clostridium cellulovorans	743B	Complete Genome	Complete Genome	30x	GCA_000145275.1
Clostridium cochlearium	NLAE-zl-C224	103158	54	734x	GCA_900103025.1
Clostridium colicanis	209318	655297	33	158.0x	GCA_000371465.1
Clostridium collagenovorans	DSM 3089	241658	35	484x	GCA_900130005.1
Clostridium coskatii	PS02	130355	85	803.0x	GCA_001636835.1
Clostridium cylindrosporum	DSM 605	302301	28	176.0x	GCA_001047375.1
Clostridium diolis	DSM 15410	92596	175	189.23x	GCA_000409695.1
Clostridium disporicum	2789STDY5834855	78184	123	100x	GCA_001404355.1
Clostridium drakei	SL1	133360	140	409.0x	GCA_000633595.2
Clostridium estertheticum	DSM 8809	Complete Genome	Complete Genome	522x	GCA_001877035.1
Clostridium fallax	DSM 2631	94344	64	488x	GCA_900129365.1
Clostridium frigidicarnis	DSM 12271	109848	114	325x	GCA_900111985.1
Clostridium gasigenes	DSM 12272	233190	51	357x	GCA_900104115.1
Clostridium grantii	DSM 8605	151119	88	315x	GCA_900129965.1
Clostridium haemolyticum	NCTC 8350	42678	234	161.0x	GCA_000768575.1
Clostridium homopropionicum	DSM 5847	178294	44	409x	GCA_900113195.1
Clostridium hydrogeniformans	DSM 21757	250804	34	Unknown	GCA_000686705.1
Clostridium ihumii	AP5	124325	96	60x	GCA_000612845.1
Clostridium intestinale	DSM 6191	171623	50	277x	GCA_900130055.1
Clostridium kluyveri	JZZ	Complete Genome	Complete Genome	Unknown	GCA_001902295.1
Clostridium ljungdahlii	DSM 13528	Complete Genome	Complete Genome	Unknown	GCA_000143685.1
Clostridium lundense	DSM 17049	205061	54	Unknown	GCA_000619945.1
Clostridium magnum	DSM 2767	740872	25	71.15x	GCA_001623875.1
Clostridium neonatale	LCDC no.99-A-005	832268	20	41x	GCA_001458595.1
Clostridium novyi	NT	Complete Genome	Complete Genome	Unknown	GCA_000014125.1
Clostridium paraputrificum	2789STDY5834955	101774	651	100x	GCA_001406515.1
Clostridium pasteurianum	M150B	Complete Genome	Complete Genome	78.38x	GCA_001856695.1
Clostridium perfringens	JP838	Complete Genome	Complete Genome	Unknown	GCA_001579785.1
Clostridium polynesiense	MS1	36480	161	37x	GCA_000820705.1
Clostridium proteolyticum	DSM 3090	121571	46	577x	GCA_900142225.1
Clostridium ragsdalei	P11	119012	79	92.82x	GCA_001675165.1
Clostridium saccharobutylicum	DSM 13864	Complete Genome	Complete Genome	25X	GCA_000473995.1
Clostridium saccharoperbutylacetonicum	N1-4(HMT)	Complete Genome	Complete Genome	Unknown	GCA_000340885.1
Clostridium sartagoforme	AAU1	25206	323	24.0x	GCA_000401215.1
Clostridium saudii	JCC	89852	100	71x	GCA_000577815.1
Clostridium scatologenes	ATCC 25775	Complete Genome	Complete Genome	21x	GCA_000968375.1
Clostridium senegalense	JC122	55710	191	Unknown	GCA_000285575.1
Clostridium septicum	P1044	71267	79	23x	GCA_900092375.1
Clostridium sporogenes	DSM 795	Complete Genome	Complete Genome	387x	GCA_001020205.1
Clostridium sulfidigenes	113A	102800	96	60.0x	GCA_000732635.1
Clostridium taeniosporum	1/k	Complete Genome	Complete Genome	56x	GCA_001735765.1
Clostridium tepidiprofundi	DSM 19306	65328	175	105x	GCA_001594005.1
Clostridium tetani	Massachusetts substr. E88	Complete Genome	Complete Genome	Unknown	GCA_000007625.1
Clostridium tetanomorphum	DSM 665	69066	224	126.0x	GCA_000647895.1
Clostridium tunisiense	TJ	341305	60	400.0x	GCA_000300195.1
Clostridium tyrobutyricum	KCTC 5387	Complete Genome	Complete Genome	224x	GCA_001642655.1
Clostridium uliginosum	DSM 12992	100213	81	263x	GCA_900112485.1
Clostridium ventriculi	17	260452	32	353x	GCA_001485185.1
Legionella adelaidensis	1762-AUS-E	138912	46	415.0x	GCA_001467055.1
Legionella anisa	WA-316-C3	129614	93	1037x	GCA_001467525.1
Legionella birminghamensis	CDC#1407-AL-14	101986	71	558x	GCA_001467505.1
Legionella bozemanii	WIGA	110810	131	860x	GCA_001467045.1
Legionella brunensis	ATCC 43878	112107	80	591x	GCA_001467025.1
Legionella cherrii	ORW	56564	140	1419x	GCA_001467035.1
Legionella cincinnatiensis	CDC#72-OH-14	97254	101	367x	GCA_001467545.1
Legionella drancourtii	LLAP12	34232	213	15x	GCA_000162755.2
Legionella drozanskii	ATCC 700990	229548	76	134x	GCA_001467585.1
Legionella dumoffii	NY 23	350377	26	612x	GCA_001467605.1
Legionella erythra	SE-32A-C8	87802	101	1524x	GCA_001467615.1
Legionella fairfieldensis	ATCC 49588	81098	67	Unknown	GCA_000621525.1
Legionella fallonii	LLAP-10	Complete Genome	Complete Genome	20x	GCA_000953135.1
Legionella feeleii	WO-44C	78561	181	1143x	GCA_001467625.1
Legionella geestiana	ATCC 49504	59334	113	71x	GCA_001467645.1
Legionella gormanii	LS-13	105762	99	631x	GCA_001467685.1
Legionella gratiana	Lyon 8420412	159223	66	422x	GCA_001467695.1
Legionella hackeliae	ATCC35250	Complete Genome	Complete Genome	20x	GCA_000953655.1
Legionella israelensis	Bercovier 4	33357	230	449x	GCA_001467785.1
Legionella jamestowniensis	JA-26-G1-E2	148091	45	1150x	GCA_001467745.1
Legionella jordanis	BL-540	491079	21	1029x	GCA_001467765.1
Legionella lansingensis	ATCC 49751	64723	93	409x	GCA_001467795.1
Legionella londiniensis	ATCC 49505	101257	62	697x	GCA_001467825.1
Legionella longbeachae	NSW150	Complete Genome	Complete Genome	Unknown	GCA_000091785.1
Legionella maceachernii	PX-1-G2-E2	89710	102	102x	GCA_001467845.1
Legionella massiliensis	LegA	1031853	8	48x	GCA_000756815.1
Legionella micdadei	ATCC33218	Complete Genome	Complete Genome	20x	GCA_000953635.1
Legionella moravica	ATCC 43877	68859	163	347x	GCA_001467865.1
Legionella nautarum	ATCC 49506	249477	58	703x	GCA_001467895.1
Legionella norrlandica	LEGN	52410	157	133.18x	GCA_000770585.1
Legionella oakridgensis	ATCC 33761 = DSM 21215; OR-10	Complete Genome	Complete Genome	Unknown	GCA_000512355.1
Legionella parisiensis	PF-209-C-C2	298156	42	1045x	GCA_001467945.1
Legionella pneumophila	Philadelphia 1	Complete Genome	Complete Genome	Unknown	GCA_000008485.1
Legionella quateirensis	ATCC 49507	107934	137	680x	GCA_001467955.1
Legionella quinlivanii	CDC#1442-AUS-E	177280	49	497x	GCA_001467975.1
Legionella rubrilucens	WA-270A-C2	267771	43	1211x	GCA_001468125.1
Legionella sainthelensi	Mt.St.Helens-4	142825	96	1018x	GCA_001468105.1
Legionella santicrucis	SC-63-C7	66217	179	687x	GCA_001468135.1
Legionella shakespearei	ATCC 49655	26335	226	828x	GCA_001468025.1
Legionella spiritensis	Mt.St.Helens-9	98434	74	396x	GCA_001468165.1
Legionella steelei	IMVS3376	496665	32	474x	GCA_001468005.1
Legionella steigerwaltii	SC-18-C9	138628	56	682x	GCA_001468065.1
Legionella tucsonensis	ATCC 49180	765009	19	251x	GCA_001468035.1
Legionella tunisiensis	LegM	17203	340	Unknown	GCA_000308315.1
Legionella wadsworthii	ATCC 33877	209480	29	Unknown	GCA_000701265.1
Legionella waltersii	ATCC 51914	93559	137	559x	GCA_001468085.1
Legionella worsleiensis	ATCC 49508	115051	68	600x	GCA_001467535.1
Staphylococcus agnetis	908	Complete Genome	Complete Genome	1600x	GCA_001442815.1
Staphylococcus argenteus	MSHR1132	Complete Genome	Complete Genome	Unknown	GCA_000236925.1
Staphylococcus arlettae	CVD059	84176	57	118.0x	GCA_000295715.1
Staphylococcus aureus	NCTC 8325	Complete Genome	Complete Genome	Unknown	GCA_000013425.1
Staphylococcus auricularis	DSM 20609	183678	54	12.0x	GCA_001500315.1
Staphylococcus capitis	AYP1020	Complete Genome	Complete Genome	164x	GCA_001028645.1
Staphylococcus caprae	M23864:W1	81609	76	Unknown	GCA_000160215.1
Staphylococcus carnosus	TM300	Complete Genome	Complete Genome	Unknown	GCA_000009405.1
Staphylococcus chromogenes	MU 970	258778	38	24.7x	GCA_000696815.1
Staphylococcus cohnii	532	455177	16	40.0x	GCA_000972575.1
Staphylococcus condimenti	DSM 11674	Complete Genome	Complete Genome	262x	GCA_001618885.1
Staphylococcus delphini	8086	30039	211	Unknown	GCA_000308115.1
Staphylococcus epidermidis	ATCC 12228	Complete Genome	Complete Genome	Unknown	GCA_000007645.1
Staphylococcus equorum	KS1039	Complete Genome	Complete Genome	653.73x	GCA_001432245.1
Staphylococcus gallinarum	DSM 20610	348300	272	150.0x	GCA_000875895.1
Staphylococcus haemolyticus	JCSC1435	Complete Genome	Complete Genome	Unknown	GCA_000009865.1
Staphylococcus hominis	C80	112484	41	23.86x	GCA_000183685.1
Staphylococcus hyicus	ATCC 11249	Complete Genome	Complete Genome	Unknown	GCA_000816085.1
Staphylococcus intermedius	NCTC 11048	33044	286	Unknown	GCA_000308095.1
Staphylococcus lentus	F1142	48378	169	146.0x	GCA_000286395.1
Staphylococcus lugdunensis	HKU09-01	Complete Genome	Complete Genome	Unknown	GCA_000025085.1
Staphylococcus massiliensis	CCUG 55927	66587	71	40.1x	GCA_000298075.1
Staphylococcus microti	DSM 22147	77222	186	12.0x	GCA_000934465.1
Staphylococcus pasteuri	SP1	Complete Genome	Complete Genome	Unknown	GCA_000494875.1
Staphylococcus pettenkoferi	VCU012	47053	116	16x	GCA_000260275.1
Staphylococcus pseudintermedius	HKU10-03	Complete Genome	Complete Genome	Unknown	GCA_000185885.1
Staphylococcus saprophyticus	ATCC 15305	Complete Genome	Complete Genome	Unknown	GCA_000010125.1
Staphylococcus schleiferi	2317-03	Complete Genome	Complete Genome	Unknown	GCA_001188915.1
Staphylococcus schweitzeri	Sa_FSCB1B	244487	26	73x	GCA_000751735.1
Staphylococcus sciuri	Z8	66138	107	400.0x	GCA_000612145.1
Staphylococcus simiae	CCM 7213	19020	565	27x	GCA_000235645.1
Staphylococcus simulans	FDAARGOS_124	Complete Genome	Complete Genome	752.212x	GCA_001559115.1
Staphylococcus succinus	14BME20	Complete Genome	Complete Genome	392.26X	GCA_001902315.1
Staphylococcus vitulinus	F1028	18796	223	100.0x	GCA_000286335.1
Staphylococcus warneri	SG1	Complete Genome	Complete Genome	Unknown	GCA_000332735.1
Staphylococcus xylosus	S170	Complete Genome	Complete Genome	568.68x	GCA_002078255.1

## Sheet: Table S2
Title:	Summary of recombination/HGT results for intra-genus level core genes
Legend:	For each genus: number of core genes, number and proportion of core genes that did and did not test positive for any recombination/HGT analysis (PHI, SBP, HGTector).
	Staphylococcus	Legionella	Campylobacter	Clostridium
Single copy core clusters	604	392	495	120
Recombinant/HGT core clusters (#)	246	51	299	53
Recombinant/HGT core clusters (%)	0.407285	0.130102	0.60404	0.441667
Non-recombinant core clusters (#)	358	341	196	67
Non-recombinant core clusters (%)	0.592715	0.869898	0.39596	0.558333

## Sheet: Table S3
Title:	rRNA gene copy numbers and HGT results for each intra-genus level species
Legend:	For each species: copy number and involvement in HGT for all rRNA genes included in phylogenetic HGT analysis. Copy number values exclude those that are partial sequences within a genome or truncated sequences at ends of genome contigs.
Genus	Species	5S	5S HGT	16S	16S HGT	23S	23S HGT
Legionella	L. adelaidensis	1	0	1	0	1	0
Legionella	L. anisa	1	0	1	0	1	0
Legionella	L. birminghamensis	1	0	1	0	1	0
Legionella	L. brunensis	1	0	1	0	1	0
Legionella	L. cincinnatiensis	1	0	1	0	1	0
Legionella	L. drozanskii	1	0	1	0	1	0
Legionella	L. dumoffii	1	0	1	0	1	0
Legionella	L. erythra	1	0	1	0	1	0
Legionella	L. feeleii	1	0	1	0	1	0
Legionella	L. geestiana	1	0	1	0	1	0
Legionella	L. gormanii	1	0	1	0	1	0
Legionella	L. gratiana	1	0	1	0	1	0
Legionella	L. israelensis	1	0	1	0	1	0
Legionella	L. jamestowniensis	1	0	1	0	1	0
Legionella	L. jordanis	1	0	1	0	1	0
Legionella	L. londiniensis	1	0	1	0	1	0
Legionella	L. maceachernii	1	0	1	0	1	0
Legionella	L. nautarum	1	0	1	0	1	0
Legionella	L. norrlandica	1	0	1	0	1	0
Legionella	L. parisiensis	1	0	1	0	1	0
Legionella	L. quateirensis	1	0	1	0	1	0
Legionella	L. quinlivanii	1	0	1	0	1	0
Legionella	L. rubrilucens	1	0	1	0	1	0
Legionella	L. shakespearei	1	0	1	0	1	0
Legionella	L. spiritensis	1	0	1	0	1	0
Legionella	L. steelei	1	0	1	0	1	0
Legionella	L. steigerwaltii	1	0	1	0	1	0
Legionella	L. tucsonensis	1	0	1	0	1	0
Legionella	L. tunisiensis	2	0	1	0	1	0
Legionella	L. wadsworthii	1	0	1	0	1	0
Legionella	L. waltersii	1	0	1	0	1	0
Legionella	L. worsleiensis	1	0	1	0	1	0
Legionella	L. drancourtii	2	0	1	0	1	0
Legionella	L. sainthelensi	2	0	1	0	1	0
Legionella	L. santicrucis	2	0	1	0	1	0
Legionella	L. bozemanii	3	0	1	0	1	0
Legionella	L. cherrii	3	0	1	0	1	0
Legionella	L. moravica	3	0	1	0	1	0
Legionella	L. fairfieldensis	3	0	3	0	1	0
Legionella	L. lansingensis	2	0	1	0	2	0
Legionella	L. massiliensis	4	0	1	0	2	0
Legionella	L. micdadei	3	0	3	0	3	0
Legionella	L. oakridgensis	3	0	3	0	3	0
Legionella	L. pneumophila	3	0	3	0	3	0
Legionella	L. fallonii	4	0	4	0	4	0
Legionella	L. hackeliae	4	0	4	0	4	0
Legionella	L. longbeachae	4	0	4	0	4	0
Campylobacter	C. sputorum	0	NA	1	0	1	0
Campylobacter	C. curvus	1	0	1	0	1	0
Campylobacter	C. gracilis	1	0	1	0	1	0
Campylobacter	C. hepaticus	1	0	1	0	1	0
Campylobacter	C. rectus	1	0	1	0	1	0
Campylobacter	C. cuniculorum	1	0	2	0	1	0
Campylobacter	C. upsaliensis	1	0	3	0	1	0
Campylobacter	C. mucosalis	1	0	1	0	2	0
Campylobacter	C. showae	1	0	1	0	2	0
Campylobacter	C. hyointestinalis	1	0	1	0	2	0
Campylobacter	C. concisus	1	0	1	0	2	0
Campylobacter	C. lari	1	0	1	0	2	0
Campylobacter	C. corcagiensis	1	0	1	0	2	0
Campylobacter	C. ureolyticus	2	0	2	0	3	0
Campylobacter	C. fetus	3	0	3	0	3	0
Campylobacter	C. coli	3	1	3	0	3	0
Campylobacter	C. jejuni	3	1	3	0	3	0
Clostridium	C. celatum	1	0	1	0	0	NA
Clostridium	C. sulfidigenes	1	0	1	0	2	0
Clostridium	C. polynesiense	1	0	1	0	2	0
Clostridium	C. arbusti	2	0	1	0	0	NA
Clostridium	C. tunisiense	2	0	1	0	2	0
Clostridium	C. drakei	3	1	1	0	2	0
Clostridium	C. disporicum	3	0	1	0	2	0
Clostridium	C. ihumii	3	1	1	0	3	1
Clostridium	C. cochlearium	4	1	1	0	0	NA
Clostridium	C. frigidicarnis	4	0	1	0	0	NA
Clostridium	C. hydrogeniformans	4	0	1	0	0	NA
Clostridium	C. cadaveris	5	0	1	0	0	NA
Clostridium	C. sartagoforme	5	0	1	0	2	0
Clostridium	C. saudii	6	1	1	0	0	NA
Clostridium	C. fallax	6	0	1	0	0	NA
Clostridium	C. proteolyticum	6	0	1	0	0	NA
Clostridium	C. amylolyticum	6	0	1	0	2	0
Clostridium	C. ventriculi	7	1	1	0	0	NA
Clostridium	C. akagii	7	0	1	0	0	NA
Clostridium	C. cavendishii	7	0	1	0	0	NA
Clostridium	C. homopropionicum	7	0	1	0	0	NA
Clostridium	C. tetanomorphum	7	0	1	0	0	NA
Clostridium	C. septicum	7	1	1	0	1	0
Clostridium	C. acetireducens	7	0	1	0	1	0
Clostridium	C. cylindrosporum	7	0	1	0	2	0
Clostridium	C. collagenovorans	8	0	1	0	0	NA
Clostridium	C. gasigenes	8	0	1	0	0	NA
Clostridium	C. intestinale	8	0	1	0	0	NA
Clostridium	C. argentinense	8	0	1	0	2	0
Clostridium	C. tepidiprofundi	8	0	1	0	2	0
Clostridium	C. diolis	9	1	1	0	0	NA
Clostridium	C. ragsdalei	9	1	1	0	0	NA
Clostridium	C. grantii	9	0	1	0	0	NA
Clostridium	C. lundense	9	0	1	0	0	NA
Clostridium	C. coskatii	9	1	1	1	2	0
Clostridium	C. senegalense	9	1	1	0	2	0
Clostridium	C. haemolyticum	10	1	1	0	2	0
Clostridium	C. uliginosum	10	1	1	0	2	0
Clostridium	C. colicanis	11	0	1	0	0	NA
Clostridium	C. paraputrificum	13	1	1	0	3	1
Clostridium	C. neonatale	8	1	3	0	0	NA
Clostridium	C. tetani	6	1	6	0	7	0
Clostridium	C. tyrobutyricum	7	0	6	0	7	0
Clostridium	C. kluyveri	6	0	7	0	8	0
Clostridium	C. taeniosporum	8	1	7	0	8	0
Clostridium	C. botulinum	8	1	8	1	9	0
Clostridium	C. bornimense	9	0	8	0	9	0
Clostridium	C. autoethanogenum	9	1	9	1	10	0
Clostridium	C. ljungdahlii	9	1	9	1	10	0
Clostridium	C. scatologenes	9	1	9	0	10	0
Clostridium	C. sporogenes	9	1	9	1	10	0
Clostridium	C. algidicarnis	9	0	9	0	10	0
Clostridium	C. cellulovorans	10	0	9	0	10	0
Clostridium	C. novyi	10	1	10	0	11	0
Clostridium	C. perfringens	10	1	10	0	11	0
Clostridium	C. pasteurianum	10	0	10	0	11	0
Clostridium	C. baratii	11	0	10	0	11	0
Clostridium	C. carboxidivorans	11	1	11	0	12	0
Clostridium	C. acetobutylicum	11	0	11	0	12	0
Clostridium	C. saccharoperbutylacetonicum	13	1	11	0	12	0
Clostridium	C. butyricum	12	1	12	0	13	0
Clostridium	C. saccharobutylicum	13	1	12	0	13	0
Clostridium	C. estertheticum	16	0	16	0	16	0
Clostridium	C. beijerinckii	17	1	16	0	17	0
Clostridium	C. magnum	27	1	27	0	23	0
Staphylococcus	S. delphini	1	0	1	1	1	0
Staphylococcus	S. intermedius	1	0	1	0	1	0
Staphylococcus	S. simiae	1	0	1	0	1	0
Staphylococcus	S. vitulinus	1	0	1	0	1	0
Staphylococcus	S. caprae	2	1	1	0	1	0
Staphylococcus	S. lentus	2	1	1	0	1	0
Staphylococcus	S. massiliensis	2	1	1	0	1	0
Staphylococcus	S. pettenkoferi	2	1	1	0	1	0
Staphylococcus	S. sciuri	4	1	1	0	1	0
Staphylococcus	S. auricularis	4	0	1	0	1	0
Staphylococcus	S. xylosus	5	1	4	0	4	0
Staphylococcus	S. carnosus	5	0	5	1	5	0
Staphylococcus	S. schweitzeri	6	1	1	0	1	0
Staphylococcus	S. arlettae	6	0	2	0	1	0
Staphylococcus	S. cohnii	6	0	5	0	1	0
Staphylococcus	S. agnetis	6	1	5	0	5	1
Staphylococcus	S. argenteus	6	1	5	1	5	0
Staphylococcus	S. aureus	6	1	5	1	5	0
Staphylococcus	S. haemolyticus	6	0	5	0	5	0
Staphylococcus	S. pasteuri	6	1	5	0	5	0
Staphylococcus	S. warneri	6	1	5	0	5	0
Staphylococcus	S. epidermidis	6	0	5	0	5	0
Staphylococcus	S. condimenti	6	1	6	1	6	0
Staphylococcus	S. simulans	6	0	6	0	6	0
Staphylococcus	S. gallinarum	7	1	1	0	1	0
Staphylococcus	S. capitis	7	1	6	0	6	0
Staphylococcus	S. hyicus	7	1	6	0	6	1
Staphylococcus	S. lugdunensis	7	1	6	0	6	0
Staphylococcus	S. pseudintermedius	7	1	6	1	6	0
Staphylococcus	S. saprophyticus	7	1	6	0	6	0
Staphylococcus	S. schleiferi	7	1	6	0	6	0
Staphylococcus	S. succinus	7	0	6	0	6	0
Staphylococcus	S. microti	8	1	1	0	1	0
Staphylococcus	S. hominis	8	0	1	0	1	0
Staphylococcus	S. equorum	8	1	7	0	7	0
Staphylococcus	S. chromogenes	9	1	1	0	1	0

## Sheet: Table S4a
Title:	Gene characteristics, gene product, concordance, and recombination/HGT results for all Campylobacter intra-genus level loci
Legend:	For all Campylobacter core genes, rRNA genes, 16S rRNA gene hypervariable regions, masked alignments, and rpoB partial sequence based on primers published by Ogier et al. (2019): gene identifier, gene product, gene category, recombination/HGT results (PHI, SBP, HGTector, phylogenetic HGT), concordance, SNP proportion, SNP count, gene length, cluster number, approximately unbiased result, and log-…
Genus	Gene	Gene product	Gene category	PHI	SBP	HGT (HGTector or phylogenetic HGT)	Concordance (%)	SNPs (%)	SNPs (#)	nt (#)	Cluster number	AU	LogL
Campylobacter	rluD_3	Ribosomal large subunit pseudouridine synthase D	NR	1	0	1	1	0.498407	782	1569	319	1	-1.42991e+06
Campylobacter	efp	Elongation factor P	NR	0	0	0	1	0.457895	261	570	657	1	-1.42991e+06
Campylobacter	rpoC	DNA-directed RNA polymerase subunit beta'	rpo	1	0	0	1	0.56	2574	4563	681	1	-1.42991e+06
Campylobacter	infC	Translation initiation factor IF-3	NR	0	0	0	1	0.551724	288	522	764	1	-1.42991e+06
Campylobacter	pnp	Polyribonucleotide nucleotidyltransferase	NR	1	0	0	0.933333	0.651735	1484	2277	443	0	-1.43004e+06
Campylobacter	mnmG	tRNA uridine 5-carboxymethylaminomethyl modification enzyme MnmG	NR	1	0	0	0.933333	0.637084	1206	1893	469	0	-1.43004e+06
Campylobacter	cfiA	2-oxoglutarate carboxylase large subunit	NR	1	1	0	0.933333	0.602848	1143	1896	529	0	-1.43004e+06
Campylobacter	cusR	Transcriptional regulatory protein CusR	NR	0	0	0	0.933333	0.445722	349	783	356	0	-1.43005e+06
Campylobacter	recJ	Single-stranded-DNA-specific exonuclease RecJ	NR	1	1	0	0.933333	0.676453	1106	1635	324	0	-1.43065e+06
Campylobacter	hemN_2	Oxygen-independent coproporphyrinogen-III oxidase	NR	1	0	0	0.933333	0.636827	875	1374	433	0	-1.43065e+06
Campylobacter	cbpA	Curved DNA-binding protein	NR	1	0	0	0.933333	0.650602	648	996	455	0	-1.43065e+06
Campylobacter	mnmE	tRNA modification GTPase MnmE	NR	1	0	1	0.933333	0.561582	994	1770	558	0	-1.43065e+06
Campylobacter	?	hypothetical protein	NR	1	1	0	0.933333	0.767042	1429	1863	535	0	-1.4307e+06
Campylobacter	fbp	Fructose-1,6-bisphosphatase class 1	NR	0	0	0	0.866667	0.679181	597	879	568	0	-1.43087e+06
Campylobacter	?	preprotein translocase subunit SecA	NR	1	0	0	0.933333	0.59948	1615	2694	553	0	-1.43087e+06
Campylobacter	ddl	D-alanine--D-alanine ligase	NR	0	0	1	0.866667	0.733711	777	1059	580	0	-1.43104e+06
Campylobacter	pta	Phosphate acetyltransferase	NR	1	0	1	0.866667	0.705556	1270	1800	624	0	-1.43107e+06
Campylobacter	accD	Acetyl-coenzyme A carboxylase carboxyl transferase subunit beta	NR	0	0	0	0.866667	0.595897	581	975	791	0	-1.43107e+06
Campylobacter	lnt	Apolipoprotein N-acyltransferase	NR	0	0	0	0.866667	0.755741	1086	1437	495	0	-1.43108e+06
Campylobacter	trmA	tRNA/tmRNA (uracil-C(5))-methyltransferase	NR	1	0	1	0.866667	0.560976	897	1599	572	0	-1.43118e+06
Campylobacter	glyS	Glycine--tRNA ligase beta subunit	NR	1	0	0	0.866667	0.763235	1557	2040	452	0	-1.43138e+06
Campylobacter	?	PD-(D/E)XK nuclease superfamily protein	NR	1	0	0	0.6	0.637668	2177	3414	682	0	-1.43158e+06
Campylobacter	folD	Bifunctional protein FolD protein	NR	1	0	0	0.866667	0.696655	604	867	562	0	-1.43161e+06
Campylobacter	rpe	Ribulose-phosphate 3-epimerase	NR	0	0	0	0.866667	0.613953	396	645	694	0	-1.43162e+06
Campylobacter	murB	UDP-N-acetylenolpyruvoylglucosamine reductase	NR	1	0	1	0.866667	0.765931	625	816	809	0	-1.43163e+06
Campylobacter	glmM	Phosphoglucosamine mutase	NR	1	0	0	0.866667	0.616815	829	1344	403	0	-1.43169e+06
Campylobacter	recG	ATP-dependent DNA helicase RecG	NR	1	0	0	0.8	0.41511	1467	3534	499	0	-1.43183e+06
Campylobacter	nspC	Carboxynorspermidine/carboxyspermidine decarboxylase	NR	1	0	0	0.866667	0.698925	845	1209	377	0	-1.43187e+06
Campylobacter	dnaE	DNA polymerase III subunit alpha	NR	1	1	1	0.866667	0.675303	2893	4284	604	0	-1.43187e+06
Campylobacter	mreB	Rod shape-determining protein MreB	NR	0	0	0	0.866667	0.525456	547	1041	598	0	-1.43224e+06
Campylobacter	comM	Competence protein ComM	NR	0	0	0	0.866667	0.715879	1091	1524	779	0	-1.43224e+06
Campylobacter	alr	Alanine racemase	NR	0	0	1	0.866667	0.779199	914	1173	537	0	-1.43226e+06
Campylobacter	?	Peptidase M16 inactive domain protein	NR	1	1	0	0.866667	0.706635	884	1251	578	0	-1.43233e+06
Campylobacter	thyX	Thymidylate synthase ThyX	NR	1	0	0	0.933333	0.624413	399	639	323	0	-1.43233e+06
Campylobacter	gph_1	Phosphoglycolate phosphatase	NR	0	0	1	0.866667	0.489498	536	1095	389	0	-1.43236e+06
Campylobacter	murC	UDP-N-acetylmuramate--L-alanine ligase	NR	1	0	0	0.866667	0.606418	926	1527	511	0	-1.43236e+06
Campylobacter	?	2-oxoglutarate-acceptor oxidoreductase subunit OorC	NR	0	0	0	0.866667	0.613191	344	561	666	0	-1.43236e+06
Campylobacter	uvrC	UvrABC system protein C	NR	1	0	0	0.8	0.727077	1348	1854	448	0	-1.43238e+06
Campylobacter	pheS	Phenylalanine--tRNA ligase alpha subunit	NR	0	1	0	0.866667	0.601602	601	999	541	0	-1.43239e+06
Campylobacter	pyk	Pyruvate kinase	NR	1	0	0	0.866667	0.697706	1034	1482	715	0	-1.43244e+06
Campylobacter	cmoA	tRNA (cmo5U34)-methyltransferase	NR	0	0	0	0.8	0.708861	504	711	440	0	-1.43244e+06
Campylobacter	folE	GTP cyclohydrolase 1	NR	0	0	0	0.866667	0.615764	375	609	783	0	-1.43252e+06
Campylobacter	dxr	1-deoxy-D-xylulose 5-phosphate reductoisomerase	NR	1	0	1	0.8	0.710997	834	1173	421	0	-1.43252e+06
Campylobacter	prs	Ribose-phosphate pyrophosphokinase	NR	0	0	0	0.8	0.549145	514	936	533	0	-1.43264e+06
Campylobacter	aroH	Phospho-2-dehydro-3-deoxyheptonate aldolase	NR	1	0	0	0.8	0.608665	871	1431	605	0	-1.43265e+06
Campylobacter	rarA	Replication-associated recombination protein A	NR	0	0	0	0.8	0.717247	865	1206	416	0	-1.43269e+06
Campylobacter	purA	Adenylosuccinate synthetase	NR	1	0	0	0.8	0.658673	824	1251	382	0	-1.43269e+06
Campylobacter	?	rod shape-determining protein MreC	NR	1	0	0	0.8	0.816733	615	753	747	0	-1.4328e+06
Campylobacter	ispDF	Bifunctional enzyme IspD/IspF	NR	0	0	1	0.8	0.637842	863	1353	357	0	-1.43301e+06
Campylobacter	aroE	Shikimate dehydrogenase	NR	0	0	1	0.8	0.773723	636	822	707	0	-1.43306e+06
Campylobacter	rpoB	DNA-directed RNA polymerase subunit beta	rpo	1	1	0	0.933333	0.54	1761	3254	480	0	-1.43314e+06
Campylobacter	rpoA	DNA-directed RNA polymerase subunit alpha	rpo	0	0	0	0.866667	0.63	653	1032	363	0	-1.43315e+06
Campylobacter	clpX	ATP-dependent Clp protease ATP-binding subunit ClpX	NR	1	0	0	0.8	0.607796	764	1257	487	0	-1.43324e+06
Campylobacter	mmpA	Metalloprotease MmpA	NR	0	0	0	0.8	0.735111	827	1125	507	0	-1.43327e+06
Campylobacter	?	putative acyl-CoA thioester hydrolase	NR	0	0	0	0.8	0.675991	290	429	534	0	-1.43327e+06
Campylobacter	fba	Fructose-bisphosphate aldolase	NR	0	0	0	0.8	0.579096	615	1062	442	0	-1.43328e+06
Campylobacter	hemA	Glutamyl-tRNA reductase	NR	1	0	1	0.8	0.635101	1006	1584	664	0	-1.4333e+06
Campylobacter	?	Aminodeoxyfutalosine deaminase	NR	0	0	0	0.8	0.797762	998	1251	330	0	-1.4333e+06
Campylobacter	?	Peptidase family M23	NR	1	0	0	0.8	0.739561	1045	1413	451	0	-1.4333e+06
Campylobacter	engB	putative GTP-binding protein EngB	NR	1	0	1	0.8	0.496795	465	936	407	0	-1.43342e+06
Campylobacter	hemB	Delta-aminolevulinic acid dehydratase	NR	0	0	0	0.8	0.60101	595	990	525	0	-1.43342e+06
Campylobacter	?	Non-canonical purine NTP pyrophosphatase	NR	1	0	0	0.8	0.720058	499	693	409	0	-1.43349e+06
Campylobacter	?	Farnesyl diphosphate synthase	NR	1	1	1	0.8	0.397834	808	2031	337	0	-1.43361e+06
Campylobacter	metK	S-adenosylmethionine synthase	NR	1	0	0	0.933333	0.556367	686	1233	494	0	-1.43363e+06
Campylobacter	aroQ	3-dehydroquinate dehydratase	NR	0	0	0	0.733333	0.592369	295	498	329	0	-1.43369e+06
Campylobacter	pad1	putative aromatic acid decarboxylase	NR	1	0	1	0.8	0.458608	626	1365	592	0	-1.43371e+06
Campylobacter	trmB	tRNA (guanine-N(7)-)-methyltransferase	NR	0	0	0	0.866667	0.435626	988	2268	653	0	-1.43371e+06
Campylobacter	pyrH	Uridylate kinase	NR	0	0	0	0.866667	0.541497	398	735	435	0	-1.43377e+06
Campylobacter	murA	UDP-N-acetylglucosamine 1-carboxyvinyltransferase	NR	0	1	0	0.8	0.622066	795	1278	545	0	-1.4338e+06
Campylobacter	folC	Bifunctional protein FolC	NR	1	0	0	0.8	0.585409	987	1686	341	0	-1.43392e+06
Campylobacter	rplB	50S ribosomal protein L2	CR	0	1	0	0.8	0.488568	406	831	825	0	-1.43395e+06
Campylobacter	ttcA	tRNA 2-thiocytidine biosynthesis protein TtcA	NR	0	0	0	0.8	0.685897	535	780	398	0	-1.43399e+06
Campylobacter	rpoB*	Ogier et al. (2019) rpoB region	rpo	0	0	0	0.8	0.474537	205	432	NA	0	-1.43399e+06
Campylobacter	smpB	SsrA-binding protein	NR	0	0	0	0.8	0.649462	302	465	488	0	-1.43399e+06
Campylobacter	priA	Primosomal protein N'	NR	1	1	0	0.866667	0.415165	1451	3495	500	0	-1.43403e+06
Campylobacter	glnA	Glutamine synthetase	NR	0	1	0	0.866667	0.590336	843	1428	616	0	-1.43413e+06
Campylobacter	guaA	GMP synthase [glutamine-hydrolyzing]	NR	1	0	0	0.8	0.617761	960	1554	384	0	-1.43415e+06
Campylobacter	speA	Biosynthetic arginine decarboxylase	NR	1	0	0	0.8	0.584814	1086	1857	596	0	-1.43419e+06
Campylobacter	?	hypothetical protein	NR	1	0	0	0.8	0.723708	406	561	660	0	-1.43422e+06
Campylobacter	dnaX	DNA polymerase III subunit tau	NR	1	0	0	0.8	0.510826	1793	3510	649	0	-1.43423e+06
Campylobacter	tsaD	tRNA N6-adenosine threonylcarbamoyltransferase	NR	0	0	0	0.866667	0.697888	760	1089	422	0	-1.4343e+06
Campylobacter	hisS	Histidine--tRNA ligase	NR	0	0	0	0.866667	0.706024	879	1245	595	0	-1.4343e+06
Campylobacter	polC	DNA polymerase III PolC-type	NR	1	0	0	0.733333	0.711111	672	945	693	0	-1.43431e+06
Campylobacter	?	Mechanosensitive ion channel	NR	0	1	1	0.733333	0.736667	1326	1800	522	0	-1.43432e+06
Campylobacter	?	lipoprotein chaperone	NR	0	0	0	0.733333	0.804143	427	531	554	0	-1.43432e+06
Campylobacter	korA	2-oxoglutarate oxidoreductase subunit KorA	NR	1	1	0	0.733333	0.615646	724	1176	668	0	-1.43432e+06
Campylobacter	ygiC	Putative acid--amine ligase YgiC	NR	0	1	0	0.733333	0.596107	735	1233	722	0	-1.43435e+06
Campylobacter	?	Cytochrome C1 family protein	NR	0	0	0	0.733333	0.761421	900	1182	472	0	-1.43445e+06
Campylobacter	rpsB	30S ribosomal protein S2	CR	0	0	0	0.8	0.501225	409	816	473	0	-1.43447e+06
Campylobacter	coaX	Type III pantothenate kinase	NR	0	0	1	0.733333	0.71072	484	681	714	0	-1.4345e+06
Campylobacter	pckA	Phosphoenolpyruvate carboxykinase [ATP]	NR	1	1	0	0.866667	0.558712	885	1584	530	0	-1.43455e+06
Campylobacter	hemE	Uroporphyrinogen decarboxylase	NR	0	0	0	0.8	0.643875	678	1053	449	0	-1.43458e+06
Campylobacter	atpD	ATP synthase subunit beta	NR	1	1	0	0.866667	0.439175	639	1455	784	0	-1.43465e+06
Campylobacter	ilvC	Ketol-acid reductoisomerase	NR	0	1	0	0.733333	0.572549	584	1020	644	0	-1.43465e+06
Campylobacter	ctpA	Carboxy-terminal processing protease CtpA precursor	NR	0	0	0	0.733333	0.607687	917	1509	675	0	-1.43471e+06
Campylobacter	moaC	Cyclic pyranopterin monophosphate synthase accessory protein	NR	0	0	0	0.8	0.624738	298	477	753	0	-1.43473e+06
Campylobacter	rnhA	Ribonuclease HI	NR	1	0	0	0.866667	0.670913	316	471	346	0	-1.43474e+06
Campylobacter	iscU	NifU-like protein	NR	0	0	0	0.733333	0.560878	562	1002	344	0	-1.43474e+06
Campylobacter	def	Peptide deformylase	NR	0	0	0	0.8	0.675725	373	552	780	0	-1.43481e+06
Campylobacter	basR	Transcriptional regulatory protein BasR	NR	0	0	1	0.8	0.764278	736	963	355	0	-1.43487e+06
Campylobacter	rpsA	30S ribosomal protein S1	CR	0	0	0	0.733333	0.661394	1129	1707	544	0	-1.43494e+06
Campylobacter	ycfH	putative deoxyribonuclease YcfH	NR	0	0	0	0.733333	0.7	588	840	637	0	-1.43494e+06
Campylobacter	xseA	Exodeoxyribonuclease 7 large subunit	NR	1	0	1	0.8	0.791986	929	1173	735	0	-1.435e+06
Campylobacter	purH	Bifunctional purine biosynthesis protein PurH	NR	0	0	0	0.733333	0.633848	985	1554	556	0	-1.43505e+06
Campylobacter	metG	Methionine--tRNA ligase	NR	1	0	0	0.666667	0.634409	1298	2046	497	0	-1.4351e+06
Campylobacter	?	putative permease YjgP/YjgQ family protein	NR	0	0	0	0.666667	0.786486	873	1110	736	0	-1.4351e+06
Campylobacter	ispB	Octaprenyl-diphosphate synthase	NR	0	0	1	0.733333	0.660643	658	996	338	0	-1.43513e+06
Campylobacter	lon	Lon protease	NR	1	0	0	0.666667	0.614055	1599	2604	504	0	-1.43517e+06
Campylobacter	?	putative permease YjgP/YjgQ family protein	NR	0	0	0	0.733333	0.797101	825	1035	574	0	-1.43518e+06
Campylobacter	aroA	3-phosphoshikimate 1-carboxyvinyltransferase	NR	0	0	0	0.866667	0.718008	937	1305	542	0	-1.43518e+06
Campylobacter	lspA	Lipoprotein signal peptidase	NR	1	0	0	0.733333	0.58124	347	597	723	0	-1.43519e+06
Campylobacter	plsY	Glycerol-3-phosphate acyltransferase	NR	0	0	0	0.733333	0.63172	470	744	724	0	-1.43519e+06
Campylobacter	glmS	Glutamine--fructose-6-phosphate aminotransferase [isomerizing]	NR	1	0	0	0.666667	0.63794	1177	1845	413	0	-1.43524e+06
Campylobacter	?	hypothetical protein	NR	1	0	0	0.666667	0.616487	1204	1953	677	0	-1.4354e+06
Campylobacter	gyrA	DNA gyrase subunit A	NR	1	0	0	0.8	0.539374	1500	2781	520	0	-1.43546e+06
Campylobacter	rplE	50S ribosomal protein L5	CR	0	0	0	0.733333	0.503623	278	552	816	0	-1.43547e+06
Campylobacter	purD	Phosphoribosylamine--glycine ligase	NR	0	0	0	0.866667	0.618638	863	1395	445	0	-1.43555e+06
Campylobacter	ruvB	Holliday junction ATP-dependent DNA helicase RuvB	NR	0	0	0	0.733333	0.605187	630	1041	415	0	-1.43555e+06
Campylobacter	queA	S-adenosylmethionine:tRNA ribosyltransferase-isomerase	NR	0	0	0	0.733333	0.722382	752	1041	429	0	-1.4356e+06
Campylobacter	?	hypothetical protein	NR	1	1	0	0.666667	0.803167	1065	1326	700	0	-1.43562e+06
Campylobacter	?	preprotein translocase subunit SecY	NR	0	0	0	0.733333	0.558195	705	1263	810	0	-1.43565e+06
Campylobacter	cynT	Carbonic anhydrase 1	NR	0	0	1	0.733333	0.692754	478	690	756	0	-1.43566e+06
Campylobacter	frr	Ribosome-recycling factor	NR	0	0	0	0.733333	0.567568	315	555	759	0	-1.43566e+06
Campylobacter	rsmH	Ribosomal RNA small subunit methyltransferase H	NR	0	0	1	0.666667	0.746667	728	975	620	0	-1.43567e+06
Campylobacter	recR	Recombination protein RecR	NR	0	0	0	0.733333	0.755208	435	576	648	0	-1.43571e+06
Campylobacter	rplN	50S ribosomal protein L14	CR	0	0	0	0.733333	0.439891	161	366	818	0	-1.43572e+06
Campylobacter	gph_3	Phosphoglycolate phosphatase	NR	0	0	1	0.733333	0.564815	549	972	390	0	-1.43575e+06
Campylobacter	lysC	Aspartokinase	NR	0	0	0	0.733333	0.583942	720	1233	434	0	-1.43578e+06
Campylobacter	groL	60 kDa chaperonin	NR	1	0	0	0.8	0.484737	794	1638	457	0	-1.43578e+06
Campylobacter	?	3',5'-cyclic-nucleotide phosphodiesterase	NR	1	0	0	0.666667	0.64631	762	1179	548	0	-1.43582e+06
Campylobacter	?	FtsH protease regulator HflC	NR	1	0	0	0.666667	0.634167	761	1200	750	0	-1.43588e+06
Campylobacter	mnmA	tRNA-specific 2-thiouridylase MnmA	NR	0	0	0	0.733333	0.674242	712	1056	326	0	-1.43588e+06
Campylobacter	murG	UDP-N-acetylglucosamine--N-acetylmuramyl- (pentapeptide) pyrophosphoryl-undecaprenol N-acetylglucosamine transferase	NR	1	0	1	0.666667	0.683824	837	1224	514	0	-1.43595e+06
Campylobacter	gmk	Guanylate kinase	NR	0	0	1	0.666667	0.747182	464	621	475	0	-1.43596e+06
Campylobacter	rnc	Ribonuclease 3	NR	0	0	1	0.733333	0.539474	492	912	347	0	-1.43601e+06
Campylobacter	lpxC	UDP-3-O-[3-hydroxymyristoyl] N-acetylglucosamine deacetylase	NR	0	0	0	0.666667	0.649775	577	888	789	0	-1.43603e+06
Campylobacter	fabD	Malonyl CoA-acyl carrier protein transacylase	NR	0	0	0	0.733333	0.68969	689	999	797	0	-1.43612e+06
Campylobacter	trpB	Tryptophan synthase beta chain	NR	0	0	0	0.733333	0.611535	721	1179	573	0	-1.43615e+06
Campylobacter	cca	Multifunctional CCA protein	NR	1	1	1	0.733333	0.458394	942	2055	585	0	-1.43623e+06
Campylobacter	rnr	Ribonuclease R	NR	1	1	0	0.733333	0.715161	1401	1959	645	0	-1.43623e+06
Campylobacter	lpxB	Lipid-A-disaccharide synthase	NR	1	0	0	0.733333	0.555788	797	1434	741	0	-1.43627e+06
Campylobacter	pgbA	Plasminogen-binding protein PgbA	NR	1	0	0	0.666667	0.768448	604	786	462	0	-1.43628e+06
Campylobacter	?	hypothetical protein	NR	0	0	1	0.733333	0.791831	601	759	527	0	-1.43628e+06
Campylobacter	lpxD	UDP-3-O-acylglucosamine N-acyltransferase	NR	1	0	0	0.733333	0.699487	682	975	428	0	-1.43632e+06
Campylobacter	purL	Phosphoribosylformylglycinamidine synthase 2	NR	1	1	0	0.733333	0.63904	1411	2208	557	0	-1.43636e+06
Campylobacter	amiA	N-acetylmuramoyl-L-alanine amidase AmiA precursor	NR	1	0	0	0.8	0.638661	1870	2928	727	0	-1.43639e+06
Campylobacter	tmk_1	Thymidylate kinase	NR	0	0	1	0.666667	0.733959	469	639	594	0	-1.43649e+06
Campylobacter	murJ	putative peptidoglycan biosynthesis protein MurJ	NR	1	0	0	0.6	0.755556	1122	1485	579	0	-1.43653e+06
Campylobacter	aspS	Aspartate--tRNA ligase	NR	1	1	0	0.733333	0.58092	1023	1761	640	0	-1.43657e+06
Campylobacter	mrdB	Rod shape-determining protein RodA	NR	0	0	0	0.6	0.65944	730	1107	516	0	-1.43662e+06
Campylobacter	ribE	Riboflavin synthase	NR	0	0	1	0.8	0.542254	462	852	460	0	-1.43663e+06
Campylobacter	slt	Soluble lytic murein transglycosylase precursor	NR	1	1	0	0.6	0.811819	1415	1743	566	0	-1.43668e+06
Campylobacter	aroB	3-dehydroquinate synthase	NR	0	0	0	0.666667	0.70255	744	1059	521	0	-1.43668e+06
Campylobacter	?	GTP cyclohydrolase 1 type 2	NR	0	0	1	0.733333	0.73494	549	747	613	0	-1.4367e+06
Campylobacter	?	putative 3'-5' exonuclease related to the exonuclease domain of PolB	NR	1	0	0	0.8	0.493873	806	1632	484	0	-1.43681e+06
Campylobacter	proS	Proline--tRNA ligase	NR	1	1	0	0.733333	0.671272	1166	1737	661	0	-1.43687e+06
Campylobacter	coaBC	Coenzyme A biosynthesis bifunctional protein CoaBC	NR	0	1	0	0.666667	0.768473	936	1218	576	0	-1.43695e+06
Campylobacter	tig	Trigger factor	NR	1	0	0	0.666667	0.691092	962	1392	782	0	-1.43698e+06
Campylobacter	murE	UDP-N-acetylmuramoyl-L-alanyl-D-glutamate--2, 6-diaminopimelate ligase	NR	1	0	1	0.6	0.726998	964	1326	340	0	-1.43705e+06
Campylobacter	mobA	putative molybdenum cofactor guanylyltransferase	NR	1	0	1	0.8	0.544477	557	1023	418	0	-1.43706e+06
Campylobacter	trxB	Thioredoxin reductase	NR	1	1	0	0.666667	0.619348	589	951	656	0	-1.43707e+06
Campylobacter	serC	Phosphoserine aminotransferase	NR	0	0	0	0.666667	0.714936	785	1098	734	0	-1.43708e+06
Campylobacter	hisD	Histidinol dehydrogenase	NR	1	1	1	0.666667	0.778539	1023	1314	361	0	-1.4371e+06
Campylobacter	smc	Chromosome partition protein Smc	NR	0	1	1	0.8	0.675472	537	795	612	0	-1.43714e+06
Campylobacter	?	putative transcriptional regulatory protein	NR	0	0	0	0.733333	0.597055	446	747	478	0	-1.43715e+06
Campylobacter	dapB	4-hydroxy-tetrahydrodipicolinate reductase	NR	0	0	0	0.666667	0.706258	553	783	766	0	-1.43719e+06
Campylobacter	?	hypothetical protein	NR	0	1	0	0.666667	0.711557	745	1047	349	0	-1.43724e+06
Campylobacter	glmU	Bifunctional protein GlmU	NR	1	0	0	0.666667	0.683516	933	1365	423	0	-1.43731e+06
Campylobacter	lepB	Signal peptidase I	NR	0	0	1	0.666667	0.681296	652	957	561	0	-1.43737e+06
Campylobacter	ybeY	Endoribonuclease YbeY	NR	0	0	1	0.733333	0.466967	311	666	795	0	-1.43738e+06
Campylobacter	hom	Homoserine dehydrogenase	NR	0	0	0	0.733333	0.680818	866	1272	767	0	-1.4374e+06
Campylobacter	?	hypothetical protein	NR	0	0	0	0.6	0.748634	411	549	383	0	-1.43741e+06
Campylobacter	?	hypothetical protein	NR	1	0	0	0.6	0.817228	1091	1335	419	0	-1.43741e+06
Campylobacter	?	hypothetical protein	NR	1	0	1	0.666667	0.299419	309	1032	719	0	-1.43744e+06
Campylobacter	?	hypothetical protein	NR	0	0	0	0.6	0.81742	488	597	342	0	-1.43748e+06
Campylobacter	?	hypothetical protein	NR	1	0	0	0.6	0.838246	2389	2850	459	0	-1.43749e+06
Campylobacter	ispE	4-diphosphocytidyl-2-C-methyl-D-erythritol kinase	NR	0	0	0	0.733333	0.768838	602	783	489	0	-1.43749e+06
Campylobacter	?	HIT-like protein	NR	0	0	0	0.666667	0.652893	237	363	540	0	-1.43757e+06
Campylobacter	?	DNA polymerase III subunit delta'	NR	1	0	0	0.6	0.793155	533	672	436	0	-1.43758e+06
Campylobacter	?	tetratricopeptide repeat protein	NR	0	0	0	0.666667	0.828169	882	1065	345	0	-1.43759e+06
Campylobacter	pepA	Cytosol aminopeptidase	NR	1	1	0	0.666667	0.676019	1012	1497	531	0	-1.4376e+06
Campylobacter	?	dUTPase	NR	0	0	1	0.6	0.704023	490	696	399	0	-1.43763e+06
Campylobacter	korB	2-oxoglutarate oxidoreductase subunit KorB	NR	0	0	0	0.6	0.580986	495	852	667	0	-1.43764e+06
Campylobacter	trmD	tRNA (guanine-N(1)-)-methyltransferase	NR	0	1	0	0.666667	0.678962	497	732	607	0	-1.43772e+06
Campylobacter	ispH	4-hydroxy-3-methylbut-2-enyl diphosphate reductase	NR	0	0	0	0.666667	0.637529	547	858	543	0	-1.43778e+06
Campylobacter	purN	Phosphoribosylglycinamide formyltransferase	NR	0	0	0	0.666667	0.679739	416	612	586	0	-1.43779e+06
Campylobacter	pepF1	Oligoendopeptidase F, plasmid	NR	1	1	0	0.666667	0.673395	1301	1932	492	0	-1.43786e+06
Campylobacter	?	uroporphyrinogen-III synthase	NR	1	0	0	0.866667	0.832593	562	675	502	0	-1.43787e+06
Campylobacter	ruvC	Crossover junction endodeoxyribonuclease RuvC	NR	0	0	0	0.666667	0.582822	285	489	833	0	-1.43788e+06
Campylobacter	murD	UDP-N-acetylmuramoylalanine--D-glutamate ligase	NR	1	0	0	0.666667	0.617902	925	1497	699	0	-1.43798e+06
Campylobacter	uppS	Isoprenyl transferase	NR	0	0	1	0.666667	0.724576	513	708	575	0	-1.43805e+06
Campylobacter	rnhB	Ribonuclease HII	NR	1	0	1	0.733333	0.725926	490	675	317	0	-1.43816e+06
Campylobacter	?	phosphoribosylformylglycinamidine synthase subunit PurS	NR	0	0	0	0.666667	0.697674	180	258	673	0	-1.43827e+06
Campylobacter	clpP	ATP-dependent Clp protease proteolytic subunit	NR	0	0	0	0.666667	0.516074	305	591	781	0	-1.43833e+06
Campylobacter	moaE	Molybdopterin synthase catalytic subunit	NR	1	0	0	0.666667	0.60221	327	543	375	0	-1.43835e+06
Campylobacter	polA	DNA polymerase I	NR	1	1	1	0.6	0.666667	1902	2853	386	0	-1.43836e+06
Campylobacter	cdsA	Phosphatidate cytidylyltransferase	NR	1	0	1	0.6	0.771995	623	807	420	0	-1.43843e+06
Campylobacter	tsaE	tRNA threonylcarbamoyladenosine biosynthesis protein TsaE	NR	0	0	1	0.666667	0.712963	308	432	628	0	-1.43852e+06
Campylobacter	purM	Phosphoribosylformylglycinamidine cyclo-ligase	NR	0	0	0	0.8	0.642424	636	990	373	0	-1.43852e+06
Campylobacter	thrZ	Threonine--tRNA ligase 2	NR	1	0	0	0.666667	0.592775	1083	1827	662	0	-1.43867e+06
Campylobacter	plsX	Phosphate acyltransferase	NR	0	1	0	0.666667	0.656863	670	1020	733	0	-1.43868e+06
Campylobacter	?	6-pyruvoyl tetrahydropterin synthase	NR	0	0	0	0.666667	0.651203	379	582	774	0	-1.43873e+06
Campylobacter	pgsA	CDP-diacylglycerol--glycerol-3-phosphate 3-phosphatidyltransferase	NR	0	0	1	0.666667	0.659612	374	567	508	0	-1.43876e+06
Campylobacter	?	RDD family protein	NR	0	0	0	0.666667	0.799087	350	438	761	0	-1.43882e+06
Campylobacter	pgi	Glucose-6-phosphate isomerase	NR	1	0	1	0.6	0.738039	941	1275	369	0	-1.43883e+06
Campylobacter	?	hypothetical protein	NR	0	0	0	0.733333	0.683333	164	240	691	0	-1.43889e+06
Campylobacter	xerD_1	Tyrosine recombinase XerD	NR	0	0	0	0.8	0.627341	670	1068	547	0	-1.43902e+06
Campylobacter	hisB	Histidine biosynthesis bifunctional protein HisB	NR	1	1	1	0.6	0.617593	667	1080	360	0	-1.43902e+06
Campylobacter	?	hypothetical protein	NR	1	0	0	0.6	0.878613	912	1038	570	0	-1.43906e+06
Campylobacter	rpmA	50S ribosomal protein L27	CR	0	0	1	0.6	0.431373	110	255	333	0	-1.43909e+06
Campylobacter	?	putative bifunctional UDP-N-acetylmuramoylalanyl-D-glutamate--2, 6-diaminopimelate ligase/UDP-N-acetylmuramoyl-tripeptide:D-alanyl-D-alanine ligase	NR	1	0	0	0.733333	0.614294	1126	1833	583	0	-1.4392e+06
Campylobacter	tilS	tRNA(Ile)-lysidine synthase	NR	1	0	0	0.666667	0.762431	828	1086	397	0	-1.43921e+06
Campylobacter	hemC	Porphobilinogen deaminase	NR	0	1	0	0.666667	0.688679	657	954	659	0	-1.43922e+06
Campylobacter	?	Putative 2-hydroxyacid dehydrogenase	NR	0	0	1	0.733333	0.705942	701	993	401	0	-1.4393e+06
Campylobacter	dcd	Deoxycytidine triphosphate deaminase	NR	0	0	0	0.6	0.483066	271	561	424	0	-1.43935e+06
Campylobacter	argH1	Argininosuccinate lyase 1	NR	1	0	1	0.666667	0.710653	1034	1455	321	0	-1.43936e+06
Campylobacter	fabZ	3-hydroxyacyl-[acyl-carrier-protein] dehydratase FabZ	NR	0	0	0	0.666667	0.596154	279	468	748	0	-1.4394e+06
Campylobacter	?	hypothetical protein	NR	0	0	0	0.666667	0.780899	417	534	721	0	-1.43944e+06
Campylobacter	ispG	4-hydroxy-3-methylbut-2-en-1-yl diphosphate synthase	NR	0	0	0	0.6	0.602151	672	1116	625	0	-1.43945e+06
Campylobacter	birA	Bifunctional ligase/repressor BirA	NR	0	0	1	0.666667	0.753823	493	654	805	0	-1.43947e+06
Campylobacter	purE	N5-carboxyaminoimidazole ribonucleotide mutase	NR	0	0	0	0.733333	0.651163	336	516	615	0	-1.43959e+06
Campylobacter	truB	tRNA pseudouridine synthase B	NR	0	0	1	0.666667	0.704571	632	897	490	0	-1.43963e+06
Campylobacter	coaE	Dephospho-CoA kinase	NR	0	0	1	0.8	0.648999	551	849	372	0	-1.43966e+06
Campylobacter	pyrB	Aspartate carbamoyltransferase	NR	1	0	1	0.6	0.75184	715	951	493	0	-1.43973e+06
Campylobacter	rluD_2	Ribosomal large subunit pseudouridine synthase D	NR	0	0	1	0.6	0.694764	544	783	320	0	-1.43984e+06
Campylobacter	?	ribosome-binding factor A	NR	0	0	0	0.733333	0.680217	251	369	786	0	-1.43984e+06
Campylobacter	ftsW	Lipid II flippase FtsW	NR	0	0	0	0.6	0.722772	876	1212	515	0	-1.43987e+06
Campylobacter	sat	Sulfate adenylyltransferase	NR	0	0	1	0.6	0.529984	981	1851	354	0	-1.43994e+06
Campylobacter	aroC	Chorismate synthase	NR	1	0	1	0.6	0.572581	852	1488	348	0	-1.43997e+06
Campylobacter	mobB	Molybdopterin-guanine dinucleotide biosynthesis adapter protein	NR	0	0	1	0.666667	0.640133	386	603	567	0	-1.43998e+06
Campylobacter	?	hypothetical protein	NR	1	0	0	0.6	0.833333	440	528	631	0	-1.44009e+06
Campylobacter	lgt	Prolipoprotein diacylglyceryl transferase	NR	0	1	0	0.666667	0.661922	558	843	706	0	-1.4401e+06
Campylobacter	metP	Methionine import system permease protein MetP	NR	0	1	1	0.666667	0.656069	681	1038	591	0	-1.44014e+06
Campylobacter	tal	Transaldolase	NR	0	0	1	0.533333	0.753372	782	1038	744	0	-1.44021e+06
Campylobacter	?	lipopolysaccharide transport periplasmic protein LptA	NR	0	0	0	0.6	0.72963	394	540	632	0	-1.44024e+06
Campylobacter	?	hypothetical protein	NR	1	0	0	0.6	0.848138	888	1047	794	0	-1.44024e+06
Campylobacter	rpmB	50S ribosomal protein L28	CR	0	0	0	0.533333	0.557292	107	192	695	0	-1.44024e+06
Campylobacter	folP	Dihydropteroate synthase	NR	1	1	1	0.666667	0.717094	839	1170	437	0	-1.44035e+06
Campylobacter	?	enterobactin exporter EntS	NR	0	0	0	0.6	0.791563	957	1209	689	0	-1.44044e+06
Campylobacter	?	hypothetical protein	NR	0	0	0	0.6	0.830258	675	813	652	0	-1.44061e+06
Campylobacter	glyQ	Glycine--tRNA ligase alpha subunit	NR	0	0	0	0.666667	0.509453	512	1005	614	0	-1.44072e+06
Campylobacter	obg	GTPase Obg	NR	1	0	0	0.666667	0.627962	795	1266	334	0	-1.44073e+06
Campylobacter	pncC	Nicotinamide-nucleotide amidohydrolase PncC	NR	0	0	1	0.6	0.844797	958	1134	509	0	-1.44077e+06
Campylobacter	argS	Arginine--tRNA ligase	NR	1	0	0	0.666667	0.620785	1123	1809	477	0	-1.44084e+06
Campylobacter	fusA	Elongation factor G	NR	1	1	0	0.6	0.463391	962	2076	325	0	-1.44087e+06
Campylobacter	ackA	Acetate kinase	NR	0	0	1	0.6	0.718377	903	1257	623	0	-1.44089e+06
Campylobacter	ppnK	putative inorganic polyphosphate/ATP-NAD kinase	NR	0	0	1	0.533333	0.728016	712	978	639	0	-1.44089e+06
Campylobacter	bcp	Putative peroxiredoxin bcp	NR	0	0	0	0.666667	0.671958	381	567	729	0	-1.44091e+06
Campylobacter	waaA	3-deoxy-D-manno-octulosonic acid transferase	NR	1	0	0	0.6	0.634694	933	1470	611	0	-1.44121e+06
Campylobacter	mlaA	putative phospholipid-binding lipoprotein MlaA precursor	NR	0	0	1	0.6	0.664474	606	912	410	0	-1.44128e+06
Campylobacter	gpmI	2,3-bisphosphoglycerate-independent phosphoglycerate mutase	NR	0	0	0	0.6	0.693712	1026	1479	698	0	-1.4414e+06
Campylobacter	?	hypothetical protein	NR	0	1	0	0.6	0.720867	266	369	453	0	-1.44146e+06
Campylobacter	ppiD	Peptidyl-prolyl cis-trans isomerase D	NR	0	1	0	0.533333	0.815534	1260	1545	619	0	-1.44154e+06
Campylobacter	rplW	50S ribosomal protein L23	CR	0	0	0	0.533333	0.569892	159	279	826	0	-1.44159e+06
Campylobacter	?	Archaea bacterial proteins of unknown function	NR	0	0	0	0.533333	0.821029	734	894	551	0	-1.44174e+06
Campylobacter	rpsC	30S ribosomal protein S3	CR	0	0	0	0.666667	0.500715	350	699	822	0	-1.44175e+06
Campylobacter	?	hypothetical protein	NR	0	0	0	0.533333	0.742351	461	621	519	0	-1.44179e+06
Campylobacter	ppa	Inorganic pyrophosphatase	NR	0	1	0	0.666667	0.579961	301	519	642	0	-1.44181e+06
Campylobacter	?	ComEC family competence protein	NR	0	0	0	0.6	0.822711	1123	1365	464	0	-1.44189e+06
Campylobacter	?	putative inner membrane protein	NR	1	0	0	0.6	0.596564	868	1455	414	0	-1.44191e+06
Campylobacter	ribF	Riboflavin biosynthesis protein RibF	NR	1	0	0	0.6	0.50797	733	1443	439	0	-1.44202e+06
Campylobacter	tsf	Elongation factor Ts	NR	1	0	0	0.6	0.626629	673	1074	474	0	-1.44203e+06
Campylobacter	ftsA	Cell division protein FtsA	NR	1	0	1	0.533333	0.679371	1123	1653	618	0	-1.44213e+06
Campylobacter	ftsZ	Cell division protein FtsZ	NR	1	0	1	0.6	0.674817	828	1227	617	0	-1.44217e+06
Campylobacter	rimP	Ribosome maturation factor RimP	NR	1	0	0	0.6	0.721133	331	459	785	0	-1.44218e+06
Campylobacter	accA	Acetyl-coenzyme A carboxylase carboxyl transferase subunit alpha	NR	0	0	0	0.533333	0.592119	556	939	696	0	-1.44219e+06
Campylobacter	greA	Transcription elongation factor GreA	NR	1	0	0	0.6	0.670757	328	489	742	0	-1.4422e+06
Campylobacter	hemN_1	Oxygen-independent coproporphyrinogen-III oxidase 1	NR	1	0	0	0.533333	0.640152	845	1320	432	0	-1.44222e+06
Campylobacter	rsmG	Ribosomal RNA small subunit methyltransferase G	NR	0	0	1	0.533333	0.752688	490	651	524	0	-1.44231e+06
Campylobacter	bamD	Outer membrane protein assembly factor BamD	NR	0	0	0	0.533333	0.755656	501	663	503	0	-1.44232e+06
Campylobacter	nth_2	Endonuclease III	NR	1	0	1	0.533333	0.801075	596	744	441	0	-1.44234e+06
Campylobacter	prmA	Ribosomal protein L11 methyltransferase	NR	0	0	0	0.6	0.747204	668	894	485	0	-1.44238e+06
Campylobacter	rlmH	Ribosomal RNA large subunit methyltransferase H	NR	0	0	1	0.666667	0.739316	346	468	792	0	-1.44246e+06
Campylobacter	dnaN	DNA polymerase III subunit beta	NR	0	1	0	0.6	0.728532	789	1083	316	0	-1.44256e+06
Campylobacter	serB	Phosphoserine phosphatase	NR	0	0	0	0.666667	0.727564	454	624	743	0	-1.44261e+06
Campylobacter	?	hypothetical protein	NR	0	0	1	0.466667	0.849537	367	432	400	0	-1.44263e+06
Campylobacter	?	hypothetical protein	NR	0	0	1	0.6	0.753181	296	393	702	0	-1.44266e+06
Campylobacter	cymR	HTH-type transcriptional regulator CymR	NR	0	0	1	0.6	0.714628	298	417	549	0	-1.44267e+06
Campylobacter	queC	7-cyano-7-deazaguanine synthase	NR	1	0	1	0.6	0.40312	491	1218	318	0	-1.44274e+06
Campylobacter	?	C-N hydrolase family amidase	NR	1	0	1	0.466667	0.52428	637	1215	466	0	-1.4428e+06
Campylobacter	?	phosphohistidine phosphatase	NR	0	0	1	0.6	0.505669	446	882	523	0	-1.44285e+06
Campylobacter	?	DNA polymerase III subunit delta	NR	1	0	0	0.533333	0.810651	822	1014	646	0	-1.44286e+06
Campylobacter	gatC	Glutamyl-tRNA(Gln) amidotransferase subunit C	NR	0	0	1	0.6	0.783505	228	291	711	0	-1.44291e+06
Campylobacter	xpsD	Type II secretion system protein D precursor	NR	1	0	1	0.533333	0.655897	1279	1950	391	0	-1.44296e+06
Campylobacter	?	hypothetical protein	NR	1	0	0	0.533333	0.808453	1186	1467	671	0	-1.44302e+06
Campylobacter	?	Integral membrane protein TerC family protein	NR	0	0	1	0.666667	0.649543	569	876	777	0	-1.44306e+06
Campylobacter	surE	5'-nucleotidase SurE	NR	0	1	1	0.466667	0.72601	575	792	740	0	-1.44306e+06
Campylobacter	thiL	Thiamine-monophosphate kinase	NR	1	0	1	0.6	0.497717	654	1314	380	0	-1.4431e+06
Campylobacter	?	hypothetical protein	NR	0	0	0	0.466667	0.802083	231	288	626	0	-1.44315e+06
Campylobacter	tyrA	T-protein	NR	1	0	1	0.6	0.717391	594	828	790	0	-1.44323e+06
Campylobacter	nth_1	Endonuclease III	NR	0	0	0	0.6	0.665109	427	642	350	0	-1.44324e+06
Campylobacter	plsC	1-acyl-sn-glycerol-3-phosphate acyltransferase	NR	0	0	1	0.6	0.777778	560	720	584	0	-1.44325e+06
Campylobacter	rplI	50S ribosomal protein L9	CR	1	0	1	0.533333	0.713333	321	450	630	0	-1.44326e+06
Campylobacter	?	hypothetical protein	NR	0	0	0	0.466667	0.910973	440	483	670	0	-1.44334e+06
Campylobacter	rlmB	23S rRNA (guanosine-2'-O-)-methyltransferase RlmB	CR	0	0	0	0.533333	0.705128	495	702	769	0	-1.44335e+06
Campylobacter	rplO	50S ribosomal protein L15	CR	0	0	0	0.533333	0.593985	237	399	811	0	-1.44341e+06
Campylobacter	rpsQ	30S ribosomal protein S17	CR	0	0	0	0.6	0.55814	144	258	819	0	-1.44343e+06
Campylobacter	?	hypothetical protein	NR	0	0	0	0.466667	0.856061	226	264	752	0	-1.44345e+06
Campylobacter	petB	Cytochrome b	NR	1	0	0	0.533333	0.567141	718	1266	471	0	-1.44346e+06
Campylobacter	?	hypothetical protein	NR	1	0	0	0.533333	0.696121	969	1392	768	0	-1.44353e+06
Campylobacter	slyD	FKBP-type peptidyl-prolyl cis-trans isomerase SlyD	NR	0	0	1	0.466667	0.530253	482	909	798	0	-1.44354e+06
Campylobacter	yccA	Modulator of FtsH protease YccA	NR	0	0	1	0.533333	0.716198	535	747	757	0	-1.44356e+06
Campylobacter	mdtE	Multidrug resistance protein MdtE precursor	NR	1	0	1	0.6	0.803105	983	1224	518	0	-1.44362e+06
Campylobacter	?	hypothetical protein	NR	0	0	0	0.466667	0.821473	658	801	368	0	-1.44366e+06
Campylobacter	hisA	1-(5-phosphoribosyl)-5-[(5- phosphoribosylamino)methylideneamino] imidazole-4-carboxamide isomerase	NR	0	0	1	0.6	0.778226	579	744	359	0	-1.44369e+06
Campylobacter	rsmE	Ribosomal RNA small subunit methyltransferase E	NR	0	1	0	0.533333	0.819005	543	663	772	0	-1.44379e+06
Campylobacter	?	sec-independent translocase	NR	1	0	1	0.666667	0.494253	387	783	431	0	-1.44384e+06
Campylobacter	kdsC	3-deoxy-D-manno-octulosonate 8-phosphate phosphatase KdsC	NR	0	0	1	0.466667	0.716049	348	486	634	0	-1.44386e+06
Campylobacter	relA	Bifunctional (p)ppGpp synthase/hydrolase RelA	NR	1	1	0	0.533333	0.673797	1512	2244	650	0	-1.44397e+06
Campylobacter	surA	Chaperone SurA precursor	NR	0	0	0	0.533333	0.833333	760	912	425	0	-1.44402e+06
Campylobacter	mog	Molybdopterin adenylyltransferase	NR	0	0	1	0.6	0.67963	367	540	600	0	-1.44403e+06
Campylobacter	acpP	Acyl carrier protein	NR	0	0	0	0.6	0.517094	121	234	697	0	-1.44405e+06
Campylobacter	rplT	50S ribosomal protein L20	CR	0	0	1	0.6	0.507003	181	357	754	0	-1.44413e+06
Campylobacter	?	thiol-disulfide oxidoreductase	NR	1	0	0	0.533333	0.671875	516	768	465	0	-1.44414e+06
Campylobacter	?	hypothetical protein	NR	1	0	0	0.533333	0.692585	962	1389	371	0	-1.44418e+06
Campylobacter	?	hypothetical protein	NR	0	0	0	0.533333	0.711712	474	666	603	0	-1.44426e+06
Campylobacter	spo0C	Chromosome-partitioning protein Spo0J	NR	1	0	1	0.6	0.737778	664	900	804	0	-1.44428e+06
Campylobacter	?	hypothetical protein	NR	1	0	1	0.666667	0.72098	677	939	463	0	-1.4443e+06
Campylobacter	petA	Ubiquinol-cytochrome c reductase iron-sulfur subunit	NR	0	0	0	0.466667	0.646825	326	504	470	0	-1.44432e+06
Campylobacter	rplD	50S ribosomal protein L4	CR	0	0	0	0.6	0.583333	378	648	827	0	-1.44434e+06
Campylobacter	htrB	Lipid A biosynthesis lauroyl acyltransferase	NR	0	0	1	0.733333	0.807128	770	954	483	0	-1.44436e+06
Campylobacter	?	hypothetical protein	NR	1	0	1	0.466667	0.734069	599	816	393	0	-1.44438e+06
Campylobacter	map	Methionine aminopeptidase 1	NR	1	1	0	0.666667	0.648294	494	762	335	0	-1.44439e+06
Campylobacter	recN	DNA repair protein RecN	NR	1	0	0	0.466667	0.753111	1150	1527	638	0	-1.4444e+06
Campylobacter	gppA	Guanosine-5'-triphosphate,3'-diphosphate pyrophosphatase	NR	0	0	1	0.466667	0.739544	1167	1578	450	0	-1.44447e+06
Campylobacter	rplF	50S ribosomal protein L6	CR	0	0	0	0.466667	0.582397	311	534	814	0	-1.4445e+06
Campylobacter	thiE	Thiamine-phosphate synthase	NR	0	0	1	0.466667	0.830383	563	678	501	0	-1.4445e+06
Campylobacter	?	recombinase A	NR	1	0	0	0.733333	0.549865	612	1113	807	0	-1.4445e+06
Campylobacter	atpH	ATP synthase subunit delta	NR	0	0	1	0.666667	0.830508	441	531	801	0	-1.44456e+06
Campylobacter	purQ	Phosphoribosylformylglycinamidine synthase 1	NR	1	0	0	0.6	0.638519	431	675	672	0	-1.44467e+06
Campylobacter	ung	Uracil-DNA glycosylase	NR	0	0	0	0.6	0.691771	496	717	331	0	-1.44468e+06
Campylobacter	groS	10 kDa chaperonin	NR	0	1	0	0.466667	0.621723	166	267	458	0	-1.44474e+06
Campylobacter	?	hypothetical protein	NR	1	0	0	0.466667	0.806159	445	552	498	0	-1.44486e+06
Campylobacter	rpmC	50S ribosomal protein L29	CR	0	0	1	0.533333	0.598958	115	192	820	0	-1.44493e+06
Campylobacter	fdoI	Formate dehydrogenase, cytochrome b556(fdo) subunit	NR	0	0	1	0.533333	0.656891	672	1023	378	0	-1.44504e+06
Campylobacter	purC	Phosphoribosylaminoimidazole-succinocarboxamide synthase	NR	0	1	0	0.533333	0.614108	444	723	674	0	-1.44519e+06
Campylobacter	?	Ferredoxin--NADP reductase	NR	1	0	0	0.466667	0.728125	699	960	655	0	-1.4452e+06
Campylobacter	acpS	Holo-[acyl-carrier-protein] synthase	NR	0	1	1	0.6	0.77686	282	363	402	0	-1.44535e+06
Campylobacter	ndk	Nucleoside diphosphate kinase	NR	0	0	0	0.6	0.523114	215	411	730	0	-1.44535e+06
Campylobacter	hisE	Phosphoribosyl-ATP pyrophosphatase	NR	1	0	1	0.466667	0.530952	669	1260	358	0	-1.44541e+06
Campylobacter	?	hypothetical protein	NR	0	0	0	0.533333	0.682171	792	1161	690	0	-1.44547e+06
Campylobacter	rplA	50S ribosomal protein L1	CR	1	0	0	0.6	0.517094	363	702	685	0	-1.44549e+06
Campylobacter	?	F0F1 ATP synthase subunit B	NR	1	0	0	0.533333	0.815443	433	531	802	0	-1.44551e+06
Campylobacter	rsmI	Ribosomal RNA small subunit methyltransferase I	NR	1	0	1	0.533333	0.726404	608	837	770	0	-1.44556e+06
Campylobacter	?	preprotein translocase subunit SecG	NR	1	0	1	0.466667	0.474957	275	579	758	0	-1.44576e+06
Campylobacter	yfhL	putative ferredoxin-like protein YfhL	NR	0	1	0	0.533333	0.585106	165	282	726	0	-1.44588e+06
Campylobacter	era	GTPase Era	NR	0	0	0	0.466667	0.724444	652	900	559	0	-1.44596e+06
Campylobacter	rsmA	Ribosomal RNA small subunit methyltransferase A	NR	0	0	1	0.466667	0.693666	668	963	830	0	-1.44597e+06
Campylobacter	nnr	Bifunctional NAD(P)H-hydrate repair enzyme Nnr	NR	1	0	0	0.466667	0.690559	1185	1716	778	0	-1.44618e+06
Campylobacter	?	Flagellin N-methylase	NR	0	0	1	0.533333	0.717949	280	390	678	0	-1.44626e+06
Campylobacter	moeZ	putative adenylyltransferase/sulfurtransferase MoeZ	NR	0	0	1	0.466667	0.818391	712	870	512	0	-1.44635e+06
Campylobacter	mqnD	1,4-dihydroxy-6-naphtoate synthase	NR	1	1	0	0.533333	0.643255	577	897	808	0	-1.44638e+06
Campylobacter	pyrF	Orotidine 5'-phosphate decarboxylase	NR	0	0	1	0.666667	0.607639	525	864	720	0	-1.44638e+06
Campylobacter	?	NapD protein	NR	0	0	0	0.533333	0.857143	306	357	589	0	-1.44641e+06
Campylobacter	?	hypothetical protein	NR	0	0	0	0.466667	0.297076	254	855	806	0	-1.44643e+06
Campylobacter	atpB	ATP synthase subunit a	NR	0	0	0	0.466667	0.639944	455	711	467	0	-1.44648e+06
Campylobacter	?	Phd_YefM	NR	0	0	0	0.466667	0.713675	167	234	581	0	-1.44666e+06
Campylobacter	rplQ	50S ribosomal protein L17	CR	0	0	0	0.666667	0.587571	208	354	362	0	-1.44667e+06
Campylobacter	pgpA	Phosphatidylglycerophosphatase A	NR	0	0	0	0.466667	0.683849	398	582	353	0	-1.44676e+06
Campylobacter	dps	DNA protection during starvation protein	NR	0	0	0	0.6	0.736842	336	456	370	0	-1.44677e+06
Campylobacter	rpsG	30S ribosomal protein S7	CR	0	0	0	0.466667	0.452991	212	468	679	0	-1.44693e+06
Campylobacter	rpsE	30S ribosomal protein S5	CR	0	0	0	0.466667	0.460317	203	441	812	0	-1.44694e+06
Campylobacter	rpsR	30S ribosomal protein S18	CR	0	1	0	0.533333	0.482759	126	261	505	0	-1.44696e+06
Campylobacter	dnaA	Chromosomal replication initiator protein DnaA	NR	1	0	0	0.466667	0.718175	976	1359	315	0	-1.44704e+06
Campylobacter	?	RlpA-like protein precursor	NR	1	0	1	0.466667	0.65752	647	984	635	0	-1.44707e+06
Campylobacter	frdC	Fumarate reductase cytochrome b subunit	NR	1	0	1	0.466667	0.727818	607	834	705	0	-1.44709e+06
Campylobacter	23S	23S rRNA gene	rRNA	0	0	0	0.4	0.200686	585	2915	NA	0	-1.44713e+06
Campylobacter	queF	NADPH-dependent 7-cyano-7-deazaguanine reductase	NR	1	0	1	0.4	0.666667	480	720	832	0	-1.4473e+06
Campylobacter	mltD	Membrane-bound lytic murein transglycosylase D precursor	NR	1	0	0	0.466667	0.812838	1051	1293	636	0	-1.4474e+06
Campylobacter	hspR	Putative heat shock protein HspR	NR	0	0	0	0.666667	0.684615	267	390	454	0	-1.44742e+06
Campylobacter	?	Nucleoid-associated protein	NR	0	0	1	0.466667	0.715596	234	327	339	0	-1.44743e+06
Campylobacter	?	exodeoxyribonuclease VII small subunit	NR	0	1	0	0.466667	0.809524	170	210	510	0	-1.44752e+06
Campylobacter	coaD	Phosphopantetheine adenylyltransferase	NR	0	0	0	0.6	0.548718	321	585	593	0	-1.44755e+06
Campylobacter	rplY	50S ribosomal protein L25	CR	0	1	0	0.466667	0.636704	340	534	738	0	-1.44755e+06
Campylobacter	pcm	Protein-L-isoaspartate O-methyltransferase	NR	1	1	0	0.6	0.725581	468	645	763	0	-1.44775e+06
Campylobacter	?	hypothetical protein	NR	0	0	0	0.466667	0.761341	386	507	622	0	-1.44775e+06
Campylobacter	?	hypothetical protein	NR	0	0	0	0.533333	0.812362	368	453	491	0	-1.44777e+06
Campylobacter	rpsM	30S ribosomal protein S13	CR	1	0	0	0.466667	0.437158	160	366	365	0	-1.4478e+06
Campylobacter	rplP	50S ribosomal protein L16	CR	0	0	0	0.466667	0.51773	219	423	821	0	-1.44793e+06
Campylobacter	?	2-succinyl-6-hydroxy-2, 4-cyclohexadiene-1-carboxylate synthase	NR	1	0	1	0.466667	0.700881	1352	1929	582	0	-1.44797e+06
Campylobacter	pfs	Aminodeoxyfutalosine nucleosidase	NR	1	0	0	0.4	0.666667	466	699	796	0	-1.44812e+06
Campylobacter	atpE	ATP synthase subunit c	NR	0	0	1	0.533333	0.577236	213	369	528	0	-1.44816e+06
Campylobacter	rplC	50S ribosomal protein L3	CR	1	0	0	0.4	0.595486	343	576	828	0	-1.44825e+06
Campylobacter	?	hypothetical protein	NR	0	0	0	0.466667	0.77381	195	252	588	0	-1.44831e+06
Campylobacter	selD	Selenide, water dikinase	NR	0	0	1	0.533333	0.702652	742	1056	379	0	-1.44836e+06
Campylobacter	?	hypothetical protein	NR	1	1	1	0.466667	0.699634	573	819	692	0	-1.44839e+06
Campylobacter	?	colicin V production protein	NR	0	0	0	0.533333	0.758197	555	732	710	0	-1.44851e+06
Campylobacter	?	heat shock protein GrpE	NR	0	0	1	0.4	0.642963	434	675	599	0	-1.44854e+06
Campylobacter	trmL	tRNA (cytidine(34)-2'-O)-methyltransferase	NR	0	0	0	0.533333	0.654321	318	486	538	0	-1.44856e+06
Campylobacter	glyA	Serine hydroxymethyltransferase	NR	0	0	0	0.733333	0.554217	690	1245	709	0	-1.44868e+06
Campylobacter	5S	5S rRNA gene	rRNA		0	0		0.306452	38	124	NA	0	-1.44879e+06
Campylobacter	rplJ	50S ribosomal protein L10	CR	0	0	0	0.466667	0.646091	314	486	684	0	-1.44882e+06
Campylobacter	?	RDD family protein	NR	0	0	1	0.466667	0.783951	381	486	444	0	-1.44882e+06
Campylobacter	rpsK	30S ribosomal protein S11	CR	0	0	0	0.466667	0.423077	165	390	364	0	-1.44893e+06
Campylobacter	?	hypothetical protein	NR	0	0	0	0.466667	0.757174	343	453	788	0	-1.44903e+06
Campylobacter	?	Phosphorylase superfamily protein	NR	0	0	0	0.466667	0.695167	561	807	831	0	-1.44908e+06
Campylobacter	atpG	ATP synthase gamma chain	NR	0	0	0	0.466667	0.630601	577	915	800	0	-1.44913e+06
Campylobacter	rsmD	Ribosomal RNA small subunit methyltransferase D	NR	1	0	0	0.6	0.337114	535	1587	394	0	-1.44921e+06
Campylobacter	folK	2-amino-4-hydroxy-6- hydroxymethyldihydropteridine pyrophosphokinase	NR	0	0	1	0.466667	0.76867	422	549	328	0	-1.4495e+06
Campylobacter	pgbB	Plasminogen-binding protein PgbB	NR	0	0	0	0.4	0.843992	871	1032	713	0	-1.44973e+06
Campylobacter	mlaE	putative phospholipid ABC transporter permease protein MlaE	NR	0	0	1	0.533333	0.759026	904	1191	336	0	-1.44978e+06
Campylobacter	?	Uracil DNA glycosylase superfamily protein	NR	0	0	1	0.533333	0.789542	604	765	560	0	-1.4499e+06
Campylobacter	?	hypothetical protein	NR	0	0	0	0.466667	0.649832	193	297	627	0	-1.45045e+06
Campylobacter	rpsF	30S ribosomal protein S6	CR	0	0	0	0.6	0.644144	286	444	506	0	-1.45048e+06
Campylobacter	hemH	Ferrochelatase	NR	0	1	1	0.4	0.645833	744	1152	676	0	-1.45088e+06
Campylobacter	?	hypothetical protein	NR	0	0	0	0.466667	0.8659	226	261	665	0	-1.45107e+06
Campylobacter	?	putative metallo-hydrolase	NR	0	0	1	0.533333	0.748485	494	660	577	0	-1.45109e+06
Campylobacter	rpsO	30S ribosomal protein S15	CR	1	0	0	0.533333	0.596296	161	270	550	0	-1.45115e+06
Campylobacter	tatC	Sec-independent protein translocase protein TatC	NR	0	0	0	0.466667	0.667964	515	771	430	0	-1.4512e+06
Campylobacter	?	16S ribosomal RNA methyltransferase	CR	0	1	1	0.533333	0.485422	616	1269	602	0	-1.45125e+06
Campylobacter	?	hypothetical protein	NR	0	0	0	0.533333	0.846024	500	591	712	0	-1.45131e+06
Campylobacter	?	hypothetical protein	NR	0	0	0	0.533333	0.863475	487	564	633	0	-1.45139e+06
Campylobacter	?	hypothetical protein	NR	0	1	0	0.533333	0.776256	170	219	479	0	-1.45148e+06
Campylobacter	?	DNA-directed RNA polymerase subunit omega	NR	0	0	0	0.533333	0.728889	164	225	651	0	-1.45149e+06
Campylobacter	hydA_3	Periplasmic [Fe] hydrogenase large subunit	NR	0	0	0	0.333333	0.618182	204	330	669	0	-1.4515e+06
Campylobacter	?	hypothetical protein	NR	0	0	0	0.466667	0.727969	380	522	773	0	-1.45197e+06
Campylobacter	?	hypothetical protein	NR	0	0	0	0.4	0.674797	166	246	609	0	-1.45201e+06
Campylobacter	gspF	Putative type II secretion system protein F	NR	0	0	1	0.533333	0.850794	1072	1260	392	0	-1.45206e+06
Campylobacter	modA	Molybdate-binding periplasmic protein precursor	NR	0	0	1	0.6	0.811648	655	807	739	0	-1.4524e+06
Campylobacter	?	cell division protein DedD	NR	0	0	0	0.466667	0.730015	968	1326	708	0	-1.45241e+06
Campylobacter	pth	Peptidyl-tRNA hydrolase	NR	0	0	1	0.466667	0.697436	408	585	737	0	-1.4525e+06
Campylobacter	?	Dihydroneopterin aldolase	NR	0	0	0	0.4	0.79023	275	348	725	0	-1.45259e+06
Campylobacter	infA	Translation initiation factor IF-1	NR	0	0	1	0.533333	0.407407	88	216	366	0	-1.4526e+06
Campylobacter	?	Divergent polysaccharide deacetylase	NR	1	0	1	0.333333	0.611913	1654	2703	643	0	-1.45266e+06
Campylobacter	rpmE	50S ribosomal protein L31	CR	0	0	0	0.533333	0.445946	99	222	771	0	-1.45266e+06
Campylobacter	atpC	ATP synthase epsilon chain	NR	0	0	1	0.4	0.753731	303	402	799	0	-1.45283e+06
Campylobacter	ubiD	3-octaprenyl-4-hydroxybenzoate carboxy-lyase	NR	0	0	0	0.6	0.698184	1307	1872	658	0	-1.45285e+06
Campylobacter	?	hypothetical protein	NR	0	0	0	0.4	0.614695	343	558	552	0	-1.45297e+06
Campylobacter	?	hypothetical protein	NR	0	0	0	0.4	0.783198	289	369	731	0	-1.45298e+06
Campylobacter	nrdB	Ribonucleoside-diphosphate reductase subunit beta	NR	0	1	0	0.733333	0.491279	507	1032	762	0	-1.45303e+06
Campylobacter	rpsI	30S ribosomal protein S9	CR	0	0	0	0.4	0.501292	194	387	387	0	-1.45303e+06
Campylobacter	?	hypothetical protein	NR	0	0	0	0.4	0.707741	448	633	447	0	-1.45303e+06
Campylobacter	pyrE	Orotate phosphoribosyltransferase	NR	0	0	1	0.533333	0.703704	456	648	760	0	-1.45304e+06
Campylobacter	?	hypothetical protein	NR	0	0	0	0.533333	0.79661	846	1062	621	0	-1.45323e+06
Campylobacter	rplV	50S ribosomal protein L22	CR	0	0	0	0.333333	0.520095	220	423	823	0	-1.45327e+06
Campylobacter	rplX	50S ribosomal protein L24	CR	0	0	0	0.4	0.568376	133	234	817	0	-1.45336e+06
Campylobacter	?	hypothetical protein	NR	0	0	0	0.466667	0.325815	520	1596	587	0	-1.4534e+06
Campylobacter	?	hypothetical protein	NR	0	0	0	0.6	0.787524	404	513	526	0	-1.45351e+06
Campylobacter	ilvE	Branched-chain-amino-acid aminotransferase	NR	1	1	0	0.333333	0.651564	604	927	749	0	-1.45358e+06
Campylobacter	?	Putative F0F1-ATPase subunit (ATPase_gene1)	NR	0	0	0	0.533333	0.643991	284	441	564	0	-1.45358e+06
Campylobacter	tcdA	tRNA threonylcarbamoyladenosine dehydratase	NR	0	0	1	0.333333	0.698479	505	723	513	0	-1.4536e+06
Campylobacter	?	S4 domain protein	NR	0	0	0	0.333333	0.575439	164	285	629	0	-1.45361e+06
Campylobacter	16S	16S V3-V4	rRNA	0	0		0.4	0.169811	72	424	NA	0	-1.45376e+06
Campylobacter	truD	tRNA pseudouridine synthase D	NR	0	0	0	0.666667	0.700252	834	1191	396	0	-1.4539e+06
Campylobacter	?	hypothetical protein	NR	0	0	0	0.4	0.839506	1156	1377	751	0	-1.45396e+06
Campylobacter	?	hypothetical protein	NR	0	0	0	0.466667	0.434174	310	714	563	0	-1.45455e+06
Campylobacter	hyaD	Hyaluronan synthase	NR	0	0	1	0.4	0.671542	1102	1641	482	0	-1.45487e+06
Campylobacter	yajL	Chaperone protein YajL	NR	0	0	1	0.533333	0.810997	472	582	539	0	-1.45508e+06
Campylobacter	lysS	Lysine--tRNA ligase	NR	1	1	0	0.533333	0.601706	917	1524	641	0	-1.45534e+06
Campylobacter	frdB	Fumarate reductase iron-sulfur subunit	NR	0	0	0	0.666667	0.544218	400	735	704	0	-1.45534e+06
Campylobacter	?	hypothetical protein	NR	0	0	0	0.466667	0.572917	220	384	517	0	-1.45546e+06
Campylobacter	rpsP	30S ribosomal protein S16	CR	0	0	0	0.533333	0.535088	122	228	610	0	-1.4555e+06
Campylobacter	pal	Peptidoglycan-associated lipoprotein precursor	NR	0	0	1	0.4	0.716763	372	519	388	0	-1.45566e+06
Campylobacter	?	preprotein translocase subunit YajC	NR	0	1	0	0.333333	0.591592	197	333	496	0	-1.45566e+06
Campylobacter	atpF	ATP synthase subunit b, sodium ion specific	NR	0	0	0	0.466667	0.832151	352	423	803	0	-1.45607e+06
Campylobacter	rplS	50S ribosomal protein L19	CR	0	0	0	0.466667	0.579096	205	354	606	0	-1.45614e+06
Campylobacter	rplK	50S ribosomal protein L11	CR	0	0	0	0.466667	0.44208	187	423	686	0	-1.45633e+06
Campylobacter	?	xanthine-guanine phosphoribosyltransferase	NR	0	0	0	0.466667	0.717439	325	453	411	0	-1.45652e+06
Campylobacter	?	YGGT family protein	NR	0	0	1	0.466667	0.767974	235	306	565	0	-1.45711e+06
Campylobacter	kdsA	2-dehydro-3-deoxyphosphooctonate aldolase	NR	1	0	1	0.533333	0.426496	499	1170	717	0	-1.45749e+06
Campylobacter	?	hypothetical protein	NR	0	0	0	0.533333	0.551789	293	531	687	0	-1.45779e+06
Campylobacter	thrB	Homoserine kinase	NR	0	0	1	0.4	0.740492	662	894	787	0	-1.45794e+06
Campylobacter	serS	Serine--tRNA ligase	NR	0	1	0	0.733333	0.655476	820	1251	663	0	-1.45812e+06
Campylobacter	rpmF	50S ribosomal protein L32	CR	0	0	1	0.266667	0.5	72	144	732	0	-1.45853e+06
Campylobacter	16S	16S V5	rRNA		0		0.4	0.158333	19	120	NA	0	-1.45879e+06
Campylobacter	rpsT	30S ribosomal protein S20	CR	0	0	0	0.466667	0.585185	158	270	352	0	-1.4589e+06
Campylobacter	rpsH	30S ribosomal protein S8	CR	0	0	0	0.4	0.580153	228	393	815	0	-1.45936e+06
Campylobacter	gap	Glyceraldehyde-3-phosphate dehydrogenase	NR	1	0	0	0.533333	0.658915	680	1032	404	0	-1.45953e+06
Campylobacter	rplR	50S ribosomal protein L18	CR	0	0	0	0.4	0.612994	217	354	813	0	-1.4602e+06
Campylobacter	?	hypothetical protein	NR	0	0	0	0.333333	0.719409	341	474	395	0	-1.46045e+06
Campylobacter	ribH	6,7-dimethyl-8-ribityllumazine synthase	NR	0	0	0	0.4	0.59375	285	480	718	0	-1.46202e+06
Campylobacter	nfuA	Fe/S biogenesis protein NfuA	NR	0	0	0	0.266667	0.634058	175	276	343	0	-1.46209e+06
Campylobacter	?	ThiS family protein	NR	0	1	0	0.4	0.711111	160	225	376	0	-1.46226e+06
Campylobacter	uppP	Undecaprenyl-diphosphatase	NR	0	0	1	0.4	0.761745	681	894	765	0	-1.46256e+06
Campylobacter	htpX	Protease HtpX	NR	0	0	0	0.6	0.742424	931	1254	601	0	-1.46266e+06
Campylobacter	rpsL	30S ribosomal protein S12	CR	0	0	0	0.4	0.409877	166	405	680	0	-1.46395e+06
Campylobacter	yocK	General stress protein 16O	NR	0	0	1	0.466667	0.811475	297	366	793	0	-1.46401e+06
Campylobacter	tlyA	16S/23S rRNA (cytidine-2'-O)-methyltransferase TlyA	CR	1	0	1	0.733333	0.254007	618	2433	438	0	-1.46443e+06
Campylobacter	tpiA	Triosephosphate isomerase	NR	1	0	0	0.666667	0.709544	513	723	406	0	-1.4646e+06
Campylobacter	ylxH_2	Flagellum site-determining protein YlxH	NR	0	0	0	0.666667	0.634322	706	1113	327	0	-1.46494e+06
Campylobacter	rpsS	30S ribosomal protein S19	CR	0	0	0	0.533333	0.405018	113	279	824	0	-1.465e+06
Campylobacter	rplU	50S ribosomal protein L21	CR	0	0	0	0.4	0.515942	178	345	332	0	-1.46532e+06
Campylobacter	?	hypothetical protein	NR	0	1	0	0.466667	0.527778	171	324	408	0	-1.46546e+06
Campylobacter	rpmG2	50S ribosomal protein L33 2	CR	0	0	0	0.266667	0.473684	81	171	688	0	-1.46602e+06
Campylobacter	?	50S ribosomal protein L35	CR	0	0	1	0.4	0.5625	108	192	755	0	-1.46669e+06
Campylobacter	rimM	Ribosome maturation factor RimM	NR	0	0	1	0.333333	0.800745	430	537	608	0	-1.46777e+06
Campylobacter	rpsJ	30S ribosomal protein S10	CR	0	0	0	0.466667	0.359649	123	342	829	0	-1.46834e+06
Campylobacter	16S	16S rRNA gene	rRNA	1	1	0	0.466667	0.18853	286	1517	NA	0	-1.46861e+06
Campylobacter	rplL	50S ribosomal protein L7/L12	CR	0	0	0	0.4	0.47619	180	378	683	0	-1.46892e+06
Campylobacter	tsaA	putative peroxiredoxin	NR	0	0	0	0.4	0.534338	319	597	728	0	-1.46901e+06
Campylobacter	?	bifunctional 3-demethylubiquinone-9 3-methyltransferase/ 2-octaprenyl-6-hydroxy phenol methylase	NR	0	0	1	0.4	0.68997	681	987	446	0	-1.46937e+06
Campylobacter	yfiH	Laccase domain protein YfiH	NR	1	0	1	0.533333	0.808805	643	795	461	0	-1.46993e+06
Campylobacter	rpiB	Ribose-5-phosphate isomerase B	NR	1	0	1	0.4	0.24818	341	1374	532	0	-1.47028e+06
Campylobacter	pgk	Phosphoglycerate kinase	NR	0	0	0	0.466667	0.603135	731	1212	405	0	-1.47086e+06
Campylobacter	prmC	Release factor glutamine methyltransferase	NR	0	0	1	0.466667	0.77551	684	882	486	0	-1.47093e+06
Campylobacter	?	hypothetical protein	NR	0	0	0	0.2	0.592262	199	336	569	0	-1.47098e+06
Campylobacter	trpS	Tryptophan--tRNA ligase	NR	1	0	0	0.466667	0.619342	602	972	716	0	-1.47422e+06
Campylobacter	tatA	Sec-independent protein translocase protein TatA	NR	0	0	1	0.333333	0.681818	180	264	476	0	-1.47455e+06
Campylobacter	16S	16S V1-2	rRNA	1	0		0.333333	0.288288	96	333	NA	0	-1.47666e+06
Campylobacter	?	hypothetical protein	NR	1	0	0	0.4	0.721461	316	438	745	0	-1.47683e+06
Campylobacter	?	Carboxynorspermidine synthase	NR	1	0	0	0.466667	0.518779	663	1278	776	0	-1.47781e+06
Campylobacter	16S-Mask	16S V4-Mask	rRNA		0		0.0666667	0.0805085	19	236	NA	0	-1.48323e+06
Campylobacter	16S-Mask	16S V3-Masked	rRNA		0		0	0	0	135	NA	0	-1.48479e+06
Campylobacter	16S	16S V3	rRNA		0		0.266667	0.111842	17	152	NA	0	-1.48723e+06
Campylobacter	16S-Mask	16S rRNA gene-Masked	rRNA	1	1		0.47	0.0997799	136	1363	NA	0	-1.4882e+06
Campylobacter	16S-Mask	16S V3-V4-Masked	rRNA		0		0.0666667	0.066313	25	377	NA	0	-1.49111e+06
Campylobacter	16S	16S V6	rRNA		0		0.0666667	0.171717	34	198	NA	0	-1.52007e+06
Campylobacter	16S	16S V8	rRNA		0		0.266667	0.140351	24	171	NA	0	-1.52294e+06
Campylobacter	16S	16S V9	rRNA		0		0.2	0.181818	20	110	NA	0	-1.54343e+06
Campylobacter	16S	16S V7	rRNA		0		0.2	0.177966	21	118	NA	0	-1.55626e+06
Campylobacter	16S	16S V4	rRNA	0	0		0.333333	0.202206	55	272	NA	0	-1.61284e+06

## Sheet: Table S4b
Title:	Gene characteristics, gene product, concordance, and recombination/HGT results for all Clostridium intra-genus level loci
Legend:	For all Clostridium core genes, rRNA genes, 16S rRNA gene hypervariable regions, masked alignments, and rpoB partial sequence based on primers published by Ogier et al. (2019): gene identifier, gene product, gene category, recombination/HGT results (PHI, SBP, HGTector, phylogenetic HGT), concordance, SNP proportion, SNP count, gene length, cluster number, approximately unbiased result, and log-li…
Genus	Gene	Gene product	Gene category	PHI	SBP	HGT (HGTector or phylogenetic HGT)	Concordance (%)	SNPs (%)	SNPs (#)	nt (#)	Cluster number	AU	LogL
Clostridium	exsA	Spore coat assembly protein ExsA	NR	0	0	1	0.935484	0.90538	1464	1617	980	1	-1.6583e+06
Clostridium	rpoC	DNA-directed RNA polymerase subunit beta'	rpo	0	0	1	0.854839	0.59	2096	3549	947	0	-1.65918e+06
Clostridium	spoIIE	Stage II sporulation protein E	NR	0	0	1	0.887097	0.866208	2266	2616	963	0	-1.65929e+06
Clostridium	infB	Translation initiation factor IF-2	NR	0	0	0	0.806452	0.658416	1596	2424	887	0	-1.66007e+06
Clostridium	rny_2	Ribonuclease Y	NR	0	1	0	0.822581	0.659162	1054	1599	894	0	-1.66027e+06
Clostridium	yacL	putative PIN and TRAM-domain containing protein YacL	NR	0	0	0	0.83871	0.705797	974	1380	955	0	-1.66048e+06
Clostridium	hrcA	Heat-inducible transcription repressor HrcA	NR	0	0	0	0.822581	0.802305	905	1128	929	0	-1.66086e+06
Clostridium	rpoB	DNA-directed RNA polymerase subunit beta	rpo	1	0	0	0.806452	0.6	2275	3792	948	0	-1.66089e+06
Clostridium	der	GTPase Der	NR	0	0	0	0.774194	0.676493	895	1323	851	0	-1.66101e+06
Clostridium	disA	DNA integrity scanning protein DisA	NR	0	0	0	0.758065	0.737213	836	1134	956	0	-1.66134e+06
Clostridium	yvcJ	Nucleotide-binding protein YvcJ	NR	0	0	0	0.758065	0.720572	655	909	916	0	-1.66143e+06
Clostridium	spoIVA	Stage IV sporulation protein A	NR	0	0	0	0.774194	0.70108	1039	1482	856	0	-1.66151e+06
Clostridium	spoIIIAE	Stage III sporulation protein AE	NR	0	0	1	0.806452	0.747748	1328	1776	909	0	-1.66163e+06
Clostridium	rnr	Ribonuclease R	NR	0	0	0	0.774194	0.721528	2078	2880	1008	0	-1.66187e+06
Clostridium	pnp	Polyribonucleotide nucleotidyltransferase	NR	0	0	0	0.774194	0.691358	1512	2187	891	0	-1.66197e+06
Clostridium	?	Cobalt-dependent inorganic pyrophosphatase	NR	0	0	1	0.806452	0.812907	1373	1689	1012	0	-1.66346e+06
Clostridium	uvrB	UvrABC system protein B	NR	1	0	0	0.677419	0.649928	1359	2091	917	0	-1.66382e+06
Clostridium	dgkA	Undecaprenol kinase	NR	0	0	0	0.725806	0.734878	571	777	924	0	-1.6641e+06
Clostridium	?	hypothetical protein	NR	0	0	0	0.693548	0.785185	742	945	857	0	-1.66433e+06
Clostridium	tsf	Elongation factor Ts	NR	0	0	0	0.790323	0.724544	676	933	878	0	-1.66466e+06
Clostridium	tig	Trigger factor	NR	0	0	0	0.725806	0.82612	1088	1317	1011	0	-1.66468e+06
Clostridium	?	hypothetical protein	NR	0	0	1	0.741935	0.660343	731	1107	911	0	-1.66475e+06
Clostridium	scpB	Segregation and condensation protein B	NR	0	0	1	0.741935	0.617675	643	1041	914	0	-1.66491e+06
Clostridium	spoIVB	SpoIVB peptidase	NR	0	0	1	0.709677	0.638752	1167	1827	883	0	-1.66513e+06
Clostridium	recO	DNA repair protein RecO	NR	0	0	1	0.645161	0.868389	706	813	923	0	-1.66538e+06
Clostridium	?	hypothetical protein	NR	0	0	0	0.741935	0.638311	1013	1587	885	0	-1.66633e+06
Clostridium	?	hypothetical protein	NR	0	0	1	0.693548	0.665131	866	1302	982	0	-1.66636e+06
Clostridium	?	hypothetical protein	NR	0	0	0	0.741935	0.699706	953	1362	895	0	-1.66637e+06
Clostridium	dnaX_1	DNA polymerase III subunit tau	NR	0	0	1	0.693548	0.8348	854	1023	1004	0	-1.66646e+06
Clostridium	?	hypothetical protein	NR	0	0	0	0.725806	0.791527	710	897	919	0	-1.66651e+06
Clostridium	minC	putative septum site-determining protein MinC	NR	0	0	0	0.693548	0.735724	554	753	933	0	-1.66704e+06
Clostridium	rplK	50S ribosomal protein L11	CR	0	0	0	0.677419	0.464355	241	519	952	0	-1.66707e+06
Clostridium	yycJ_2	Putative metallo-hydrolase YycJ	NR	0	0	0	0.709677	0.774473	625	807	970	0	-1.66726e+06
Clostridium	rbgA	Ribosome biogenesis GTPase A	NR	0	0	1	0.66129	0.663858	709	1068	854	0	-1.66779e+06
Clostridium	?	hypothetical protein	NR	0	0	1	0.741935	0.774594	811	1047	985	0	-1.66804e+06
Clostridium	queA	S-adenosylmethionine:tRNA ribosyltransferase-isomerase	NR	0	0	0	0.725806	0.669452	721	1077	998	0	-1.66805e+06
Clostridium	xseA	Exodeoxyribonuclease 7 large subunit	NR	0	0	1	0.66129	0.789954	1038	1314	912	0	-1.66815e+06
Clostridium	?	hypothetical protein	NR	0	0	1	0.629032	0.761905	496	651	866	0	-1.66818e+06
Clostridium	era	GTPase Era	NR	0	0	0	0.693548	0.70187	638	909	852	0	-1.6683e+06
Clostridium	ylbJ	Sporulation integral membrane protein YlbJ	NR	0	0	1	0.709677	0.826667	1178	1425	864	0	-1.66832e+06
Clostridium	gpmI	2,3-bisphosphoglycerate-independent phosphoglycerate mutase	NR	0	0	0	0.629032	0.718048	1118	1557	1007	0	-1.66833e+06
Clostridium	rimM	Ribosome maturation factor RimM	NR	0	0	0	0.693548	0.818182	432	528	873	0	-1.66868e+06
Clostridium	tilS_3	tRNA(Ile)-lysidine synthase	NR	0	0	1	0.645161	0.780806	1375	1761	962	0	-1.66944e+06
Clostridium	truB	tRNA pseudouridine synthase B	NR	0	0	1	0.612903	0.805986	781	969	889	0	-1.66976e+06
Clostridium	ruvB	Holliday junction ATP-dependent DNA helicase RuvB	NR	0	0	1	0.612903	0.67655	753	1113	990	0	-1.67033e+06
Clostridium	pyrH	Uridylate kinase	NR	1	0	0	0.645161	0.63388	464	732	879	0	-1.67049e+06
Clostridium	cdsA	Phosphatidate cytidylyltransferase	NR	0	0	0	0.693548	0.8	732	915	881	0	-1.67056e+06
Clostridium	divIVA	Septum site-determining protein DivIVA	NR	0	0	1	0.645161	0.639423	798	1248	905	0	-1.67068e+06
Clostridium	rimP	Ribosome maturation factor RimP	NR	1	0	1	0.629032	0.722807	412	570	884	0	-1.67084e+06
Clostridium	hemN_3	Oxygen-independent coproporphyrinogen-III oxidase-like protein YqeR	NR	0	0	0	0.645161	0.754596	944	1251	869	0	-1.67099e+06
Clostridium	dxr	1-deoxy-D-xylulose 5-phosphate reductoisomerase	NR	0	0	0	0.612903	0.668053	964	1443	882	0	-1.67105e+06
Clostridium	frr	Ribosome-recycling factor	NR	0	0	0	0.66129	0.738739	410	555	880	0	-1.67107e+06
Clostridium	?	hypothetical protein	NR	0	0	0	0.629032	0.836735	1107	1323	865	0	-1.6712e+06
Clostridium	?	hypothetical protein	NR	0	0	1	0.677419	0.814607	435	534	860	0	-1.6716e+06
Clostridium	rplI	50S ribosomal protein L9	CR	0	0	0	0.612903	0.76	342	450	991	0	-1.67181e+06
Clostridium	ychF	Ribosome-binding ATPase YchF	NR	0	0	0	0.629032	0.64795	727	1122	901	0	-1.67207e+06
Clostridium	ssbA_3	Single-stranded DNA-binding protein A	NR	0	0	0	0.612903	0.58961	681	1155	981	0	-1.67217e+06
Clostridium	?	hypothetical protein	NR	0	0	1	0.548387	0.832061	327	393	908	0	-1.6722e+06
Clostridium	rpsB	30S ribosomal protein S2	CR	0	0	0	0.596774	0.53696	385	717	877	0	-1.6727e+06
Clostridium	thiN	Thiamine pyrophosphokinase	NR	1	0	1	0.596774	0.861968	587	681	861	0	-1.67277e+06
Clostridium	rplA	50S ribosomal protein L1	CR	0	0	0	0.596774	0.525538	391	744	951	0	-1.67336e+06
Clostridium	miaA	tRNA dimethylallyltransferase	NR	0	0	0	0.580645	0.773134	777	1005	896	0	-1.67342e+06
Clostridium	?	hypothetical protein	NR	0	0	1	0.580645	0.818182	432	528	953	0	-1.67398e+06
Clostridium	rbfA	Ribosome-binding factor A	NR	0	0	1	0.66129	0.760563	324	426	888	0	-1.67414e+06
Clostridium	?	hypothetical protein	NR	0	0	0	0.564516	0.768061	606	789	904	0	-1.67417e+06
Clostridium	rpsO	30S ribosomal protein S15	CR	0	0	0	0.564516	0.605042	216	357	890	0	-1.67451e+06
Clostridium	ftsB	Cell division protein FtsB	NR	0	0	0	0.548387	0.744681	315	423	964	0	-1.67452e+06
Clostridium	engB	putative GTP-binding protein EngB	NR	1	0	1	0.66129	0.755869	483	639	853	0	-1.67501e+06
Clostridium	mreC	Cell shape-determining protein MreC	NR	0	0	1	0.580645	0.761696	521	684	935	0	-1.67504e+06
Clostridium	?	hypothetical protein	NR	0	0	0	0.629032	0.773946	404	522	900	0	-1.6752e+06
Clostridium	ruvA	Holliday junction ATP-dependent DNA helicase RuvA	NR	0	0	0	0.564516	0.740448	562	759	999	0	-1.67576e+06
Clostridium	radA	DNA repair protein RadA	NR	0	0	1	0.725806	0.759794	1183	1557	876	0	-1.67593e+06
Clostridium	rsmA	Ribosomal RNA small subunit methyltransferase A	NR	0	0	0	0.564516	0.746085	667	894	984	0	-1.67623e+06
Clostridium	?	hypothetical protein	NR	1	0	0	0.532258	0.641914	389	606	965	0	-1.6766e+06
Clostridium	recR	Recombination protein RecR	NR	0	0	0	0.564516	0.589041	387	657	1003	0	-1.67669e+06
Clostridium	trmL	tRNA (cytidine(34)-2'-O)-methyltransferase	NR	0	0	0	0.548387	0.722222	377	522	1000	0	-1.67675e+06
Clostridium	tepA	Translocation-enhancing protein TepA	NR	0	0	0	0.66129	0.647564	678	1047	893	0	-1.67696e+06
Clostridium	ftsL	Cell division protein FtsL	NR	0	0	0	0.580645	0.773449	536	693	902	0	-1.67706e+06
Clostridium	divIB	Cell division protein DivIB	NR	0	0	1	0.548387	0.789757	879	1113	903	0	-1.67725e+06
Clostridium	rimO_1	Ribosomal protein S12 methylthiotransferase RimO	NR	0	0	0	0.596774	0.703504	783	1113	870	0	-1.67818e+06
Clostridium	?	hypothetical protein	NR	0	0	0	0.516129	0.650794	205	315	987	0	-1.67863e+06
Clostridium	?	hypothetical protein	NR	0	0	1	0.516129	0.751111	169	225	907	0	-1.67879e+06
Clostridium	sigH	RNA polymerase sigma-H factor	NR	0	0	0	0.467742	0.674699	504	747	921	0	-1.67923e+06
Clostridium	pth	Peptidyl-tRNA hydrolase	NR	0	0	0	0.483871	0.791019	458	579	968	0	-1.67967e+06
Clostridium	?	hypothetical protein	NR	0	0	0	0.516129	0.841975	341	405	920	0	-1.6806e+06
Clostridium	rplJ	50S ribosomal protein L10	CR	0	0	0	0.612903	0.613707	394	642	950	0	-1.68077e+06
Clostridium	ybeY	Endoribonuclease YbeY	NR	0	0	0	0.564516	0.812865	417	513	925	0	-1.68078e+06
Clostridium	yrrK	Putative pre-16S rRNA nuclease	NR	0	0	0	0.5	0.679325	322	474	988	0	-1.68118e+06
Clostridium	cmk	Cytidylate kinase	NR	0	0	1	0.516129	0.811594	560	690	897	0	-1.68169e+06
Clostridium	yabP	Spore protein YabP	NR	0	0	1	0.516129	0.765766	255	333	966	0	-1.68186e+06
Clostridium	smpB	SsrA-binding protein	NR	0	0	0	0.548387	0.679702	365	537	1009	0	-1.6819e+06
Clostridium	grpE	Protein GrpE	NR	0	0	0	0.532258	0.696893	830	1191	928	0	-1.68236e+06
Clostridium	comEA	ComE operon protein 1	NR	1	0	1	0.5	0.654739	1043	1593	930	0	-1.68294e+06
Clostridium	?	hypothetical protein	NR	0	0	0	0.483871	0.71875	207	288	967	0	-1.68408e+06
Clostridium	16S-Mask	16S rRNA gene-Masked	rRNA	0	0		0.16	0.265858	285	1072	NA	0	-1.68583e+06
Clostridium	tgt	Queuine tRNA-ribosyltransferase	NR	1	0	0	0.516129	0.677864	787	1161	997	0	-1.68613e+06
Clostridium	rpsP	30S ribosomal protein S16	CR	0	0	0	0.451613	0.616279	159	258	872	0	-1.68639e+06
Clostridium	?	hypothetical protein	NR	0	0	1	0.387097	0.75	333	444	871	0	-1.68652e+06
Clostridium	?	hypothetical protein	NR	0	0	0	0.435484	0.769504	217	282	886	0	-1.68697e+06
Clostridium	?	hypothetical protein	NR	0	0	0	0.483871	0.86	387	450	1001	0	-1.68701e+06
Clostridium	efp	Elongation factor P	NR	0	0	0	0.483871	0.617284	350	567	906	0	-1.68719e+06
Clostridium	xseB	Exodeoxyribonuclease 7 small subunit	NR	0	0	1	0.483871	0.800766	209	261	913	0	-1.68798e+06
Clostridium	rpsL	30S ribosomal protein S12	CR	0	0	0	0.483871	0.511811	195	381	946	0	-1.68808e+06
Clostridium	rpmB	50S ribosomal protein L28	CR	0	0	0	0.483871	0.677249	128	189	862	0	-1.68833e+06
Clostridium	mrnC	Mini-ribonuclease 3	NR	0	0	1	0.435484	0.731373	373	510	954	0	-1.68836e+06
Clostridium	?	hypothetical protein	NR	0	0	1	0.435484	0.76	342	450	875	0	-1.68852e+06
Clostridium	rplS	50S ribosomal protein L19	CR	0	0	0	0.532258	0.471861	218	462	874	0	-1.68886e+06
Clostridium	?	hypothetical protein	NR	1	0	0	0.483871	0.798177	613	768	910	0	-1.68948e+06
Clostridium	rpmF	50S ribosomal protein L32	CR	0	0	0	0.516129	0.715054	133	186	867	0	-1.68992e+06
Clostridium	?	hypothetical protein	NR	0	0	1	0.532258	0.807808	269	333	926	0	-1.69062e+06
Clostridium	rpoA	DNA-directed RNA polymerase subunit alpha	rpo	0	0	1	0.53	0.62	588	948	858	0	-1.69151e+06
Clostridium	?	hypothetical protein	NR	0	0	1	0.435484	0.541667	169	312	992	0	-1.69201e+06
Clostridium	cobD_2	Cobalamin biosynthesis protein CobD	NR	1	0	1	0.435484	0.757819	848	1119	959	0	-1.69394e+06
Clostridium	?	hypothetical protein	NR	1	0	1	0.467742	0.686869	272	396	989	0	-1.69545e+06
Clostridium	rpoB*	Ogier et al. (2019) rpoB region	rpo	0	0	0	0.387097	0.597727	263	440	NA	0	-1.6977e+06
Clostridium	?	hypothetical protein	NR	0	0	1	0.435484	0.70073	288	411	892	0	-1.69979e+06
Clostridium	rplL_3	50S ribosomal protein L7/L12	CR	0	0	1	0.419355	0.596774	222	372	949	0	-1.70071e+06
Clostridium	16S-Mask	16S V3-V4-Masked	rRNA		0		0.306452	0.268868	81	381	NA	0	-1.7041e+06
Clostridium	rlmH	Ribosomal RNA large subunit methyltransferase H	NR	0	0	0	0.322581	0.645714	339	525	971	0	-1.72173e+06
Clostridium	5S	5S rRNA gene	rRNA		0	1	0.290323	0.605042	72	119	NA	0	-1.72329e+06
Clostridium	16S	16S V8	rRNA		0		0.177419	0.145349	25	172	NA	0	-1.724e+06
Clostridium	?	hypothetical protein	NR	0	0	0	0.258065	0.652047	223	342	863	0	-1.73389e+06
Clostridium	16S	16S V1-2	rRNA		0		0.290323	0.22807	78	342	NA	0	-1.74177e+06
Clostridium	23S	23S rRNA gene	rRNA	0	0	1		0.403898	1202	2976	NA	0	-1.74193e+06
Clostridium	16S-Mask	16S V4-Mask	rRNA	0	0		0.225806	0.190083	46	242	NA	0	-1.74293e+06
Clostridium	?	hypothetical protein	NR	0	0	0	0.306452	0.703057	483	687	986	0	-1.74605e+06
Clostridium	16S	16S V9	rRNA		0		0.129032	0.144068	17	118	NA	0	-1.75284e+06
Clostridium	16S	16S V4	rRNA		0		0.451613	0.279412	76	272	NA	0	-1.75451e+06
Clostridium	sbcD	Nuclease SbcCD subunit D	NR	0	0	1	0.306452	0.746062	1184	1587	915	0	-1.7603e+06
Clostridium	16S	16S V3-V4	rRNA	0	0		0.451613	0.212598	114	424	NA	0	-1.7912e+06
Clostridium	16S	16S V7	rRNA		0		0.16129	0.181818	22	121	NA	0	-1.79494e+06
Clostridium	16S-Mask	16S V3-Masked	rRNA	0	0		0.0645161	0.161765	22	136	NA	0	-1.80652e+06
Clostridium	16S	16S V6	rRNA		0		0.129032	0.185567	36	194	NA	0	-1.82204e+06
Clostridium	16S	16S rRNA gene	rRNA	1	0	1	0.516129	0.237936	355	1492	NA	0	-1.85655e+06
Clostridium	16S	16S V3	rRNA		0		0.177419	0.25	38	152	NA	0	-1.9598e+06
Clostridium	16S	16S V5	rRNA		0		0.241935	0.165289	20	121	NA	0	-1.92293e+07

## Sheet: Table S4c
Title:	Gene characteristics, gene product, concordance, and recombination/HGT results for all Legionella intra-genus level loci
Legend:	For all Legionella core genes, rRNA genes, 16S rRNA gene hypervariable regions, masked alignments, and rpoB partial sequence based on primers published by Ogier et al. (2019): gene identifier, gene product, gene category, recombination/HGT results (PHI, SBP, HGTector, phylogenetic HGT), concordance, SNP proportion, SNP count, gene length, cluster number, approximately unbiased result, and log-lik…
Genus	Gene	Gene product	Gene category	PHI	SBP	HGT (HGTector or phylogenetic HGT)	Concordance (%)	SNPs (%)	SNPs (#)	nt (#)	Cluster number	AU	LogL
Legionella	rpoC	DNA-directed RNA polymerase subunit beta'	rpo	0	0	0	0.8	0.51	2193	4331	969	1	-6.63859e+06
Legionella	pabB	Aminodeoxychorismate synthase component 1	NR	0	0	0	0.822	0.733	1185	1617	1123	1	-6.63912e+06
Legionella	nrdA	Ribonucleoside-diphosphate reductase 1 subunit alpha	NR	0	0	0	0.889	0.55	1557	2832	1162	1	-6.63913e+06
Legionella	mrdB	Rod shape-determining protein RodA	NR	0	0	0	0.822	0.612	688	1125	959	0	-6639466
Legionella	lptD	LPS-assembly protein LptD precursor	NR	0	0	0	0.8	0.752	2325	3093	878	0	-6.63964e+06
Legionella	comM	Competence protein ComM	NR	0	1	0	0.778	0.691	1051	1521	948	0	-6.64e+06
Legionella	lysU	Lysine--tRNA ligase, heat inducible	NR	0	0	0	0.756	0.58	935	1611	897	0	-6.64033e+06
Legionella	xcpW	Type II secretion system protein J precursor	NR	0	0	0	0.756	0.792	544	687	1163	0	-6.64036e+06
Legionella	?	S1/P1 Nuclease	NR	0	0	0	0.711	0.752	796	1059	1125	0	-6.64055e+06
Legionella	?	hypothetical protein	NR	0	0	0	0.867	0.551	842	1527	1015	0	-6640988
Legionella	?	hypothetical protein	NR	0	0	0	0.6	0.798	481	603	1224	0	-6.64115e+06
Legionella	rpoB	DNA-directed RNA polymerase subunit beta	rpo	0	0	0	0.84	0.5	2070	4140	962	0	-6.64147e+06
Legionella	recQ	ATP-dependent DNA helicase RecQ	NR	0	0	0	0.844	0.694	1323	1905	870	0	-6.64164e+06
Legionella	?	tetratricopeptide repeat protein	NR	0	0	0	0.756	0.632	741	1173	1095	0	-6.64226e+06
Legionella	iscS	Cysteine desulfurase	NR	0	0	0	0.778	0.692	824	1191	900	0	-6.64235e+06
Legionella	pheS	Phenylalanine--tRNA ligase alpha subunit	NR	0	0	0	0.711	0.582	642	1104	1061	0	-6.64241e+06
Legionella	rimO	Ribosomal protein S12 methylthiotransferase RimO	NR	0	0	0	0.756	0.562	772	1374	1212	0	-6.64255e+06
Legionella	?	hypothetical protein	NR	0	0	0	0.867	0.773	610	789	903	0	-6.6427e+06
Legionella	rlmL	Ribosomal RNA large subunit methyltransferase K/L	NR	0	0	0	0.822	0.709	1525	2151	873	0	-6.64271e+06
Legionella	corC	Magnesium and cobalt efflux protein CorC	NR	0	0	0	0.889	0.645	592	918	888	0	-6.64325e+06
Legionella	?	hypothetical protein	NR	0	0	0	0.778	0.78	768	984	1103	0	-6.64416e+06
Legionella	amiC	N-acetylmuramoyl-L-alanine amidase AmiC precursor	NR	0	0	0	0.844	0.659	1157	1755	1067	0	-6.64439e+06
Legionella	infB	Translation initiation factor IF-2	NR	0	1	0	0.756	0.581	1888	3249	1005	0	-6.64459e+06
Legionella	purB	Adenylosuccinate lyase	NR	0	0	0	0.778	0.59	906	1536	854	0	-6.64484e+06
Legionella	rpoA	DNA-directed RNA polymerase subunit alpha	rpo	0	0	0	0.8	0.559	550	990	985	0	-6.64494e+06
Legionella	proS	Proline--tRNA ligase	NR	0	0	0	0.778	0.618	1118	1809	1057	0	-6.64501e+06
Legionella	?	recombinase A	NR	0	0	0	0.689	0.493	584	1185	1257	0	-6.64507e+06
Legionella	rplY	50S ribosomal protein L25	CR	0	0	0	0.778	0.647	481	744	930	0	-6.64528e+06
Legionella	hemX	Putative uroporphyrinogen-III C-methyltransferase	NR	0	0	0	0.8	0.844	1081	1281	1054	0	-6.64546e+06
Legionella	sufD	FeS cluster assembly protein SufD	NR	0	0	0	0.733	0.796	1058	1329	901	0	-6.64546e+06
Legionella	asd2	Aspartate-semialdehyde dehydrogenase 2	NR	0	0	0	0.711	0.6	614	1023	1226	0	-6.646e+06
Legionella	lpxC	UDP-3-O-[3-hydroxymyristoyl] N-acetylglucosamine deacetylase	NR	0	0	0	0.8	0.596	560	939	956	0	-6.64609e+06
Legionella	tyrS	Tyrosine--tRNA ligase	NR	0	1	0	0.8	0.619	791	1278	918	0	-6646149
Legionella	lptF	Lipopolysaccharide export system permease protein LptF	NR	0	0	0	0.8	0.705	793	1125	904	0	-6.64658e+06
Legionella	?	hypothetical protein	NR	0	0	0	0.822	0.679	572	843	943	0	-6.64691e+06
Legionella	?	AhpC/TSA family protein	NR	0	0	0	0.6	0.683	410	600	1182	0	-6647175
Legionella	folC	Bifunctional protein FolC	NR	0	0	0	0.733	0.803	1216	1515	860	0	-6.64739e+06
Legionella	hflC	Modulator of FtsH protease HflC	NR	0	0	0	0.756	0.681	637	936	935	0	-6.64766e+06
Legionella	surA	Chaperone SurA precursor	NR	0	0	0	0.8	0.665	929	1398	877	0	-6.64776e+06
Legionella	glpE	Thiosulfate sulfurtransferase GlpE	NR	0	0	0	0.756	0.795	341	429	1035	0	-6.64823e+06
Legionella	queA	S-adenosylmethionine:tRNA ribosyltransferase-isomerase	NR	0	0	0	0.667	0.712	722	1014	1159	0	-6.64842e+06
Legionella	tdcG	L-serine dehydratase TdcG	NR	0	1	0	0.778	0.578	815	1410	856	0	-6.64872e+06
Legionella	?	hypothetical protein	NR	0	0	0	0.578	0.733	319	435	1117	0	-6.64878e+06
Legionella	ldh	Leucine dehydrogenase	NR	0	0	0	0.778	0.658	719	1092	1032	0	-6.64883e+06
Legionella	aroA	3-phosphoshikimate 1-carboxyvinyltransferase	NR	0	0	0	0.756	0.701	929	1326	1093	0	-6.64884e+06
Legionella	?	ribosomal-protein-alanine N-acetyltransferase	NR	0	0	0	0.8	0.827	791	957	916	0	-6.64909e+06
Legionella	truB	tRNA pseudouridine synthase B	NR	0	0	0	0.733	0.756	767	1014	1013	0	-6.64919e+06
Legionella	?	hypothetical protein	NR	0	0	0	0.778	0.724	893	1233	1038	0	-6.64921e+06
Legionella	ppsR	Phosphoenolpyruvate synthase regulatory protein	NR	0	0	1	0.778	0.636	546	858	1114	0	-6649216
Legionella	ydgJ	putative oxidoreductase YdgJ	NR	0	0	0	0.733	0.66	745	1128	1164	0	-6.64928e+06
Legionella	?	hypothetical protein	NR	0	0	0	0.733	0.594	269	453	1071	0	-6.64937e+06
Legionella	murC	UDP-N-acetylmuramate--L-alanine ligase	NR	0	0	0	0.8	0.625	950	1521	958	0	-6.64939e+06
Legionella	dnaX_2	DNA polymerase III subunit tau	NR	0	0	0	0.778	0.66	1595	2415	1006	0	-6.64939e+06
Legionella	dnaX_1	DNA polymerase III subunit tau	NR	0	0	0	0.711	0.82	893	1089	1007	0	-6.64947e+06
Legionella	?	hypothetical protein	NR	0	0	0	0.689	0.85	334	393	1258	0	-6.64955e+06
Legionella	nrdB	Ribonucleoside-diphosphate reductase subunit beta	NR	0	0	0	0.622	0.468	541	1155	1161	0	-6.64988e+06
Legionella	nrdR	Transcriptional repressor NrdR	NR	0	0	0	0.622	0.6	286	477	1141	0	-6.64998e+06
Legionella	accD	Acetyl-coenzyme A carboxylase carboxyl transferase subunit beta	NR	0	0	0	0.578	0.569	574	1008	1213	0	-6.64998e+06
Legionella	atpF_2	ATP synthase subunit b	NR	0	0	0	0.644	0.626	321	513	1189	0	-6.65001e+06
Legionella	dut	Deoxyuridine 5'-triphosphate nucleotidohydrolase	NR	0	0	0	0.533	0.551	281	510	1112	0	-6.65018e+06
Legionella	exbD	Biopolymer transport protein ExbD	NR	0	0	1	0.444	0.614	289	471	1127	0	-6.65028e+06
Legionella	outO	Type 4 prepilin-like proteins leader peptide-processing enzyme	NR	0	0	0	0.733	0.759	683	900	1111	0	-6.65052e+06
Legionella	rluB	Ribosomal large subunit pseudouridine synthase B	NR	0	0	0	0.756	0.658	517	786	848	0	-6.65065e+06
Legionella	nuoH	NADH-quinone oxidoreductase subunit H	NR	0	0	0	0.711	0.566	581	1026	1020	0	-6.65139e+06
Legionella	folP	Dihydropteroate synthase	NR	0	0	0	0.733	0.758	723	954	1027	0	-6.65175e+06
Legionella	cc4	Cytochrome c4 precursor	NR	0	0	0	0.756	0.554	470	849	859	0	-6.65199e+06
Legionella	ybgI	Putative GTP cyclohydrolase 1 type 2	NR	0	0	0	0.689	0.746	564	756	837	0	-6.65209e+06
Legionella	ompR_2	Transcriptional regulatory protein OmpR	NR	0	0	0	0.711	0.807	622	771	961	0	-6.65242e+06
Legionella	kdsB	3-deoxy-manno-octulosonate cytidylyltransferase	NR	0	0	0	0.467	0.813	729	897	1178	0	-6652447
Legionella	dapB	4-hydroxy-tetrahydrodipicolinate reductase	NR	0	0	0	0.756	0.715	536	750	917	0	-6.65252e+06
Legionella	rplB	50S ribosomal protein L2	CR	0	0	0	0.778	0.549	453	825	1001	0	-6652569
Legionella	miaA	tRNA dimethylallyltransferase	NR	0	0	0	0.778	0.728	745	1023	1068	0	-6.65276e+06
Legionella	?	hypothetical protein	NR	0	0	0	0.689	0.559	874	1563	824	0	-6.65279e+06
Legionella	spmA	Spore maturation protein A	NR	0	0	0	0.756	0.641	392	612	921	0	-6.65282e+06
Legionella	gph	Phosphoglycolate phosphatase	NR	0	0	0	0.756	0.782	556	711	970	0	-6652841
Legionella	rluD	Ribosomal large subunit pseudouridine synthase D	NR	0	0	0	0.644	0.435	759	1743	1210	0	-6.65285e+06
Legionella	tsaD	tRNA N6-adenosine threonylcarbamoyltransferase	NR	0	0	0	0.8	0.626	712	1137	891	0	-6.65288e+06
Legionella	rlmH	Ribosomal RNA large subunit methyltransferase H	NR	0	0	1	0.644	0.65	388	597	1165	0	-6.65288e+06
Legionella	?	hypothetical protein	NR	0	0	0	0.778	0.667	906	1359	922	0	-6.65306e+06
Legionella	anmK	Anhydro-N-acetylmuramic acid kinase	NR	0	0	0	0.778	0.749	905	1209	1089	0	-6.65306e+06
Legionella	etfB	Electron transfer flavoprotein subunit beta	NR	0	0	0	0.733	0.684	525	768	1153	0	-6.65311e+06
Legionella	serS	Serine--tRNA ligase	NR	0	0	0	0.733	0.743	972	1308	932	0	-6.65321e+06
Legionella	grxD	Glutaredoxin-4	NR	0	0	0	0.6	0.56	200	357	1195	0	-6.6536e+06
Legionella	?	hypothetical protein	NR	0	0	0	0.778	0.537	614	1143	1222	0	-6653651
Legionella	cptB	Antitoxin CptB	NR	0	0	1	0.556	0.723	245	339	1129	0	-6.65371e+06
Legionella	mlaC	putative phospholipid-binding protein MlaC precursor	NR	0	0	0	0.733	0.724	443	612	841	0	-6.65375e+06
Legionella	folD	Bifunctional protein FolD protein	NR	0	0	0	0.711	0.675	634	939	911	0	-6.65393e+06
Legionella	lipA	Lipoyl synthase	NR	0	0	0	0.689	0.552	568	1029	863	0	-6.65398e+06
Legionella	pdxA1	4-hydroxythreonine-4-phosphate dehydrogenase 1	NR	0	0	0	0.711	0.494	746	1509	876	0	-6.65413e+06
Legionella	epmB	L-lysine 2,3-aminomutase	NR	0	0	0	0.756	0.696	754	1083	880	0	-6.6543e+06
Legionella	?	cytoskeletal protein RodZ	NR	0	0	0	0.667	0.733	484	660	1121	0	-6.65445e+06
Legionella	lptE	LPS-assembly lipoprotein LptE precursor	NR	0	0	0	0.622	0.776	561	723	1215	0	-6.65464e+06
Legionella	etfA	Electron transfer flavoprotein subunit alpha	NR	0	1	0	0.644	0.681	658	966	1154	0	-6.6547e+06
Legionella	?	hypothetical protein	NR	0	0	0	0.6	0.705	391	555	1131	0	-6.6548e+06
Legionella	hflK_1	Modulator of FtsH protease HflK	NR	0	0	0	0.778	0.657	818	1245	936	0	-6.65481e+06
Legionella	coaE	Dephospho-CoA kinase	NR	0	0	0	0.689	0.786	542	690	1104	0	-6.65516e+06
Legionella	recX	Regulatory protein RecX	NR	0	0	0	0.578	0.819	408	498	1248	0	-6.65533e+06
Legionella	ccmC	Heme exporter protein C	NR	0	0	0	0.711	0.627	534	852	834	0	-6.65566e+06
Legionella	yiaD_1	putative lipoprotein YiaD precursor	NR	0	0	0	0.733	0.778	462	594	867	0	-6.65566e+06
Legionella	ftsZ	Cell division protein FtsZ	NR	0	0	1	0.8	0.515	661	1284	957	0	-6.65581e+06
Legionella	tgt_2	Queuine tRNA-ribosyltransferase	NR	0	0	0	0.667	0.608	740	1218	1056	0	-6.65648e+06
Legionella	?	hypothetical protein	NR	0	0	0	0.533	0.547	520	951	1138	0	-6.65652e+06
Legionella	gcvH	Glycine cleavage system H protein	NR	0	0	1	0.556	0.667	262	393	1176	0	-6.65656e+06
Legionella	rsgA	Putative ribosome biogenesis GTPase RsgA	NR	0	0	0	0.733	0.738	790	1071	1051	0	-6.65668e+06
Legionella	secB	Protein-export protein SecB	NR	0	0	1	0.467	0.531	330	621	1228	0	-6.65669e+06
Legionella	?	hypothetical protein	NR	0	0	0	0.711	0.803	494	615	973	0	-6.65687e+06
Legionella	ccmH_2	Cytochrome c-type biogenesis protein CcmH precursor	NR	0	0	0	0.711	0.827	628	759	831	0	-6.65721e+06
Legionella	surE	5'-nucleotidase SurE	NR	0	0	0	0.689	0.65	503	774	1259	0	-6.65758e+06
Legionella	rsmG	Ribosomal RNA small subunit methyltransferase G	NR	0	0	0	0.689	0.765	496	648	1046	0	-6.65763e+06
Legionella	?	protease TldD	NR	0	0	0	0.733	0.574	849	1479	827	0	-6657718
Legionella	nagL	Maleylpyruvate isomerase	NR	0	0	0	0.711	0.727	482	663	890	0	-6.65773e+06
Legionella	?	hypothetical protein	NR	0	0	0	0.733	0.664	446	672	974	0	-6.65796e+06
Legionella	truA	tRNA pseudouridine synthase A	NR	0	0	0	0.778	0.513	482	939	912	0	-6.65801e+06
Legionella	?	hypothetical protein	NR	0	0	0	0.733	0.806	757	939	1045	0	-6.65828e+06
Legionella	fda	Fructose-bisphosphate aldolase class 1	NR	0	0	0	0.711	0.614	624	1017	942	0	-6.65838e+06
Legionella	xseB	Exodeoxyribonuclease 7 small subunit	NR	0	0	1	0.422	0.558	164	294	1230	0	-6.65838e+06
Legionella	?	Alpha/beta hydrolase family protein	NR	0	0	0	0.711	0.701	637	909	895	0	-6.65849e+06
Legionella	?	lipopolysaccharide exporter periplasmic protein	NR	0	0	0	0.756	0.835	496	594	843	0	-6.65865e+06
Legionella	aruG	Arginine N-succinyltransferase subunit beta	NR	0	0	0	0.689	0.449	810	1806	887	0	-6.65871e+06
Legionella	ychF	Ribosome-binding ATPase YchF	NR	0	0	0	0.644	0.546	595	1089	926	0	-6.65873e+06
Legionella	nuoJ	NADH-quinone oxidoreductase subunit J	NR	0	0	0	0.756	0.687	484	705	1018	0	-6.65895e+06
Legionella	glyQ	Glycine--tRNA ligase alpha subunit	NR	0	0	0	0.644	0.478	470	984	1253	0	-6.65899e+06
Legionella	?	hypothetical protein	NR	0	0	0	0.733	0.636	525	825	861	0	-6.65931e+06
Legionella	pilQ	Type IV pilus biogenesis and competence protein PilQ precursor	NR	0	0	0	0.711	0.749	1875	2505	914	0	-6.65933e+06
Legionella	bioH	Pimeloyl-[acyl-carrier protein] methyl ester esterase	NR	0	0	0	0.667	0.741	605	816	894	0	-6.65936e+06
Legionella	yngG	Hydroxymethylglutaryl-CoA lyase YngG	NR	0	0	0	0.756	0.664	604	909	1072	0	-6.65937e+06
Legionella	trmJ	tRNA (cytidine/uridine-2'-O-)-methyltransferase TrmJ	NR	0	0	0	0.6	0.692	540	780	1218	0	-6.65939e+06
Legionella	trpA	Tryptophan synthase alpha chain	NR	0	0	0	0.667	0.716	593	828	913	0	-6.65946e+06
Legionella	?	hypothetical protein	NR	0	0	0	0.578	0.641	429	669	1180	0	-6.65957e+06
Legionella	?	SpoVR family protein	NR	0	0	0	0.711	0.573	880	1536	1033	0	-6.65972e+06
Legionella	?	hypothetical protein	NR	0	0	0	0.622	0.595	389	654	963	0	-6.65982e+06
Legionella	pcs	Phosphatidylcholine synthase	NR	0	1	0	0.667	0.618	510	825	941	0	-6.65985e+06
Legionella	nuoE	NADH-quinone oxidoreductase subunit E	NR	0	0	0	0.689	0.568	344	606	1022	0	-6.65995e+06
Legionella	tilS	tRNA(Ile)-lysidine synthase	NR	0	0	0	0.711	0.732	1364	1863	857	0	-6.66001e+06
Legionella	?	Peptidase family M50	NR	0	0	0	0.844	0.728	498	684	1152	0	-6.66006e+06
Legionella	nadC	Nicotinate-nucleotide pyrophosphorylase [carboxylating]	NR	0	0	0	0.667	0.709	613	864	853	0	-6.66008e+06
Legionella	ruvC	Crossover junction endodeoxyribonuclease RuvC	NR	0	0	1	0.689	0.618	367	594	1261	0	-6.66011e+06
Legionella	?	Macrophage killing protein with similarity to conjugation protein	NR	0	0	0	0.711	0.674	542	804	964	0	-6.66014e+06
Legionella	ansA	L-asparaginase 1	NR	0	0	0	0.689	0.659	836	1269	1041	0	-6.6602e+06
Legionella	rpsD	30S ribosomal protein S4	CR	0	0	0	0.622	0.612	378	618	986	0	-6.6602e+06
Legionella	dnaE2	Error-prone DNA polymerase	NR	0	0	0	0.756	0.767	679	885	1099	0	-6.66027e+06
Legionella	tsf	Elongation factor Ts	NR	0	0	0	0.711	0.603	537	891	1107	0	-6.66034e+06
Legionella	?	Alpha/beta hydrolase family protein	NR	0	0	0	0.644	0.704	530	753	1077	0	-6.66047e+06
Legionella	nlpD	Murein hydrolase activator NlpD precursor	NR	0	0	0	0.711	0.669	668	999	919	0	-6.66053e+06
Legionella	rne	Ribonuclease E	NR	0	0	0	0.8	0.572	1386	2421	1225	0	-6.66071e+06
Legionella	?	hypothetical protein	NR	0	0	0	0.711	0.727	504	693	1090	0	-6.66089e+06
Legionella	?	translocation protein TolB	NR	1	0	0	0.778	0.686	889	1296	1126	0	-6.66089e+06
Legionella	?	hypothetical protein	NR	0	0	0	0.733	0.715	590	825	1157	0	-6.66092e+06
Legionella	recR	Recombination protein RecR	NR	0	0	0	0.689	0.639	397	621	1010	0	-6.66092e+06
Legionella	?	tetratricopeptide repeat protein	NR	0	0	0	0.711	0.767	711	927	910	0	-6.66117e+06
Legionella	?	hypothetical protein	NR	0	0	0	0.578	0.802	474	591	1147	0	-6.66118e+06
Legionella	ctaB	Protoheme IX farnesyltransferase	NR	0	0	0	0.689	0.628	575	915	972	0	-6.66121e+06
Legionella	?	hypothetical protein	NR	0	0	0	0.689	0.756	245	324	1254	0	-6.66177e+06
Legionella	atpE_2	ATP synthase subunit c	NR	0	0	0	0.467	0.407	111	273	1190	0	-6661991
Legionella	?	hypothetical protein	NR	0	0	0	0.444	0.802	207	258	1171	0	-6.66219e+06
Legionella	?	spermidine synthase	NR	0	0	0	0.756	0.84	675	804	886	0	-6662435
Legionella	folK	2-amino-4-hydroxy-6- hydroxymethyldihydropteridine pyrophosphokinase	NR	0	0	0	0.622	0.655	456	696	1119	0	-6.66257e+06
Legionella	panB	3-methyl-2-oxobutanoate hydroxymethyltransferase	NR	0	0	0	0.644	0.665	531	798	1076	0	-6.6626e+06
Legionella	prpC	2-methylcitrate synthase	NR	0	0	0	0.711	0.628	705	1122	1092	0	-6.6626e+06
Legionella	pdxJ	Pyridoxine 5'-phosphate synthase	NR	0	1	0	0.644	0.612	490	801	829	0	-6.66274e+06
Legionella	nuoM	NADH-quinone oxidoreductase subunit M	NR	0	0	0	0.778	0.553	833	1506	1017	0	-6.66293e+06
Legionella	pgsA2	Putative CDP-diacylglycerol--glycerol-3-phosphate 3-phosphatidyl-transferase 2	NR	0	0	0	0.711	0.703	519	738	1029	0	-6.66297e+06
Legionella	?	putative nucleotide-binding protein	NR	0	0	0	0.511	0.602	291	483	1250	0	-6.66317e+06
Legionella	rimP	Ribosome maturation factor RimP	NR	0	0	0	0.733	0.511	339	663	1016	0	-6.66322e+06
Legionella	?	putative transcriptional regulatory protein	NR	0	0	0	0.733	0.6	450	750	1260	0	-6.66335e+06
Legionella	accA	Acetyl-coenzyme A carboxylase carboxyl transferase subunit alpha	NR	0	0	0	0.667	0.545	518	951	862	0	-6.66349e+06
Legionella	atpC	ATP synthase epsilon chain	NR	0	0	1	0.689	0.593	265	447	1185	0	-6.66354e+06
Legionella	hda	DnaA regulatory inactivator Hda	NR	0	0	0	0.711	0.725	568	783	1031	0	-6.66361e+06
Legionella	epsH	Putative glycosyltransferase EpsH	NR	0	0	0	0.711	0.638	607	951	845	0	-6.66369e+06
Legionella	pyrB	Aspartate carbamoyltransferase	NR	0	0	1	0.667	0.707	683	966	949	0	-6.66388e+06
Legionella	yccA	Modulator of FtsH protease YccA	NR	0	0	0	0.644	0.57	453	795	828	0	-6.66397e+06
Legionella	?	hypothetical protein	NR	0	0	0	0.689	0.656	663	1011	1073	0	-6.664e+06
Legionella	?	hypothetical protein	NR	0	0	0	0.311	0.53	178	336	1262	0	-6.66401e+06
Legionella	?	hypothetical protein	NR	0	0	0	0.733	0.41	545	1329	1186	0	-6.66456e+06
Legionella	pyrD	Dihydroorotate dehydrogenase (quinone)	NR	1	0	0	0.778	0.701	751	1071	1256	0	-6.6646e+06
Legionella	?	hypothetical protein	NR	0	0	0	0.733	0.886	720	813	825	0	-6.66462e+06
Legionella	ccmB	Heme exporter protein B	NR	0	0	0	0.644	0.786	533	678	835	0	-6664636
Legionella	pgk	Phosphoglycerate kinase	NR	0	0	0	0.756	0.621	741	1194	1209	0	-6.66467e+06
Legionella	rarA	Replication-associated recombination protein A	NR	0	0	0	0.689	0.658	872	1326	1008	0	-6.66469e+06
Legionella	rppH	RNA pyrophosphohydrolase	NR	0	0	1	0.6	0.577	353	612	1042	0	-6664845
Legionella	miaB	(Dimethylallyl)adenosine tRNA methylthiotransferase MiaB	NR	0	0	0	0.8	0.538	734	1365	1211	0	-6.66488e+06
Legionella	prmB	50S ribosomal protein L3 glutamine methyltransferase	CR	0	0	0	0.667	0.698	685	981	1227	0	-6.66507e+06
Legionella	apaH	Bis(5'-nucleosyl)-tetraphosphatase, symmetrical	NR	0	0	0	0.578	0.714	619	867	1199	0	-6.66537e+06
Legionella	nuoC1	NADH-quinone oxidoreductase subunit C 1	NR	0	0	0	0.644	0.683	469	687	1023	0	-6.66552e+06
Legionella	gpmI	2,3-bisphosphoglycerate-independent phosphoglycerate mutase	NR	0	0	0	0.689	0.692	1080	1560	934	0	-6.66557e+06
Legionella	ybeZ_1	PhoH-like protein	NR	0	0	0	0.6	0.615	661	1074	1037	0	-6.6656e+06
Legionella	?	hypothetical protein	NR	0	0	0	0.467	0.452	259	573	1169	0	-6.66576e+06
Legionella	mreD	Rod shape-determining protein MreD	NR	0	0	0	0.711	0.726	405	558	849	0	-6.66585e+06
Legionella	hflX	GTPase HflX	NR	0	0	0	0.667	0.662	868	1311	927	0	-6666198
Legionella	?	hypothetical protein	NR	0	0	0	0.667	0.597	491	822	836	0	-6.66632e+06
Legionella	tgt_1	Queuine tRNA-ribosyltransferase	NR	0	0	0	0.689	0.813	812	999	1160	0	-6.66632e+06
Legionella	ftsX	Cell division protein FtsX	NR	0	0	0	0.711	0.791	736	930	1075	0	-6.66669e+06
Legionella	?	hypothetical protein	NR	0	0	0	0.689	0.539	396	735	1053	0	-6.66671e+06
Legionella	rbfA	Ribosome-binding factor A	NR	0	0	1	0.711	0.682	262	384	1014	0	-6.66699e+06
Legionella	epmA	Elongation factor P--(R)-beta-lysine ligase	NR	0	0	0	0.644	0.732	751	1026	896	0	-6.66712e+06
Legionella	pgsA	CDP-diacylglycerol--glycerol-3-phosphate 3-phosphatidyltransferase	NR	0	0	0	0.644	0.575	397	690	1030	0	-6.66722e+06
Legionella	mlaD	putative phospholipid ABC transporter-binding protein MlaD	NR	0	0	0	0.622	0.58	289	498	842	0	-6.66723e+06
Legionella	proC	Pyrroline-5-carboxylate reductase	NR	0	0	0	0.622	0.841	737	876	1155	0	-6667399
Legionella	atpH	ATP synthase subunit delta	NR	0	0	1	0.778	0.777	445	573	1188	0	-6.66754e+06
Legionella	recO	DNA repair protein RecO	NR	0	0	0	0.622	0.837	633	756	830	0	-6.66763e+06
Legionella	?	hypothetical protein	NR	0	0	0	0.689	0.852	593	696	879	0	-6.66764e+06
Legionella	sspA	Stringent starvation protein A	NR	0	0	0	0.711	0.583	360	618	889	0	-6668745
Legionella	smpB	SsrA-binding protein	NR	0	0	1	0.667	0.661	347	525	1036	0	-6.66887e+06
Legionella	?	hypothetical protein	NR	0	0	0	0.733	0.641	992	1548	1181	0	-6.66893e+06
Legionella	ugpQ	Glycerophosphoryl diester phosphodiesterase	NR	0	0	0	0.644	0.68	598	879	1183	0	-6.66932e+06
Legionella	petA	Ubiquinol-cytochrome c reductase iron-sulfur subunit	NR	0	0	0	0.644	0.625	521	834	1064	0	-6.6695e+06
Legionella	trmD	tRNA (guanine-N(1)-)-methyltransferase	NR	0	0	0	0.622	0.642	520	810	977	0	-6.66952e+06
Legionella	?	hypothetical protein	NR	0	0	0	0.667	0.641	567	885	1101	0	-6.66954e+06
Legionella	rsfS	Ribosomal silencing factor RsfS	NR	0	0	1	0.6	0.692	305	441	1166	0	-6.66961e+06
Legionella	gloB	Hydroxyacylglutathione hydrolase	NR	0	0	0	0.667	0.785	605	771	1249	0	-6.67041e+06
Legionella	hpf	Ribosome hibernation promoting factor	NR	0	0	1	0.667	0.702	219	312	940	0	-6670847
Legionella	?	BolA-like protein	NR	0	0	1	0.622	0.72	175	243	838	0	-6.67117e+06
Legionella	dsbB	Disulfide bond formation protein B	NR	0	0	0	0.644	0.797	447	561	1055	0	-6.67134e+06
Legionella	pal	Peptidoglycan-associated lipoprotein precursor	NR	0	0	1	0.711	0.612	336	549	866	0	-6.67147e+06
Legionella	mip	Outer membrane protein MIP precursor	NR	0	0	0	0.644	0.565	505	894	855	0	-6.67151e+06
Legionella	?	putative global regulator	NR	0	0	0	0.689	0.818	986	1206	1130	0	-6.67181e+06
Legionella	?	PHB/PHA accumulation regulator DNA-binding domain protein	NR	0	0	1	0.644	0.761	363	477	905	0	-6.6719e+06
Legionella	bamD	Outer membrane protein assembly factor BamD precursor	NR	0	0	0	0.644	0.612	580	948	875	0	-6.67197e+06
Legionella	?	cell division protein DedD	NR	0	0	0	0.778	0.702	975	1389	1214	0	-6.6722e+06
Legionella	icd	Isocitrate dehydrogenase [NADP]	NR	0	0	0	0.667	0.521	694	1332	847	0	-6.67266e+06
Legionella	ndhC	NAD(P)H-quinone oxidoreductase subunit 3	NR	0	0	0	0.733	0.566	202	357	1025	0	-6.67319e+06
Legionella	nuoF	NADH-quinone oxidoreductase subunit F	NR	0	0	0	0.644	0.513	679	1323	1021	0	-6.67327e+06
Legionella	?	hypothetical protein	NR	0	0	0	0.578	0.672	349	519	1142	0	-6.67339e+06
Legionella	?	hypothetical protein	NR	0	0	0	0.622	0.64	190	297	1219	0	-6.67363e+06
Legionella	rpe	Ribulose-phosphate 3-epimerase	NR	0	0	0	0.8	0.665	475	714	1220	0	-6674286
Legionella	ctaG	Cytochrome c oxidase assembly protein CtaG	NR	0	0	0	0.644	0.623	374	600	1048	0	-6.67434e+06
Legionella	tsaE	tRNA threonylcarbamoyladenosine biosynthesis protein TsaE	NR	0	0	0	0.556	0.783	390	498	1066	0	-6.67485e+06
Legionella	rpsC	30S ribosomal protein S3	CR	0	0	0	0.667	0.514	339	660	999	0	-6.67497e+06
Legionella	skp	Chaperone protein Skp precursor	NR	0	0	0	0.711	0.61	315	516	933	0	-6.67499e+06
Legionella	rimM	Ribosome maturation factor RimM	NR	0	0	0	0.6	0.758	405	534	976	0	-6.67511e+06
Legionella	nifU_1	NifU-like protein	NR	0	0	0	0.622	0.642	289	450	899	0	-6.67515e+06
Legionella	?	cell division protein MraZ	NR	0	0	1	0.622	0.589	318	540	1150	0	-6.67557e+06
Legionella	?	hypothetical protein	NR	0	0	0	0.667	0.699	545	780	1080	0	-6.67564e+06
Legionella	rsmD	Ribosomal RNA small subunit methyltransferase D	NR	0	0	0	0.578	0.775	437	564	874	0	-6.67568e+06
Legionella	?	hypothetical protein	NR	0	0	0	0.667	0.668	375	561	1049	0	-6.67576e+06
Legionella	resA	Thiol-disulfide oxidoreductase ResA	NR	0	0	0	0.578	0.604	415	687	832	0	-6.67579e+06
Legionella	aroQ	3-dehydroquinate dehydratase	NR	0	0	0	0.6	0.761	434	570	944	0	-6.67768e+06
Legionella	?	putative general secretion pathway protein YghD	NR	0	0	0	0.667	0.85	426	501	1137	0	-6.67818e+06
Legionella	gcvT	Aminomethyltransferase	NR	0	0	0	0.733	0.596	794	1332	1175	0	-6.67827e+06
Legionella	ybeY	Endoribonuclease YbeY	NR	0	0	0	0.6	0.703	371	528	1098	0	-6.67836e+06
Legionella	dnaK	Chaperone protein DnaK	NR	0	0	0	0.644	0.489	966	1974	850	0	-6.67882e+06
Legionella	ccmE	Cytochrome c-type biogenesis protein CcmE	NR	0	0	0	0.689	0.751	390	519	833	0	-6.67885e+06
Legionella	yqgF	Putative Holliday junction resolvase	NR	0	0	0	0.6	0.667	312	468	950	0	-6.67897e+06
Legionella	infA	Translation initiation factor IF-1	NR	0	0	1	0.489	0.356	109	306	1216	0	-6.67958e+06
Legionella	?	hypothetical protein	NR	0	0	0	0.689	0.749	393	525	1087	0	-6.6796e+06
Legionella	?	heat shock protein GrpE	NR	0	0	0	0.689	0.606	496	819	1235	0	-6.68033e+06
Legionella	lipB	Octanoyltransferase	NR	0	0	0	0.644	0.681	419	615	1102	0	-6.6804e+06
Legionella	trmB	tRNA (guanine-N(7)-)-methyltransferase	NR	0	0	0	0.533	0.729	529	726	937	0	-6.68064e+06
Legionella	bioB	Biotin synthase	NR	0	0	0	0.6	0.658	681	1035	1105	0	-6.68073e+06
Legionella	minD	Septum site-determining protein MinD	NR	0	0	0	0.6	0.539	479	888	1047	0	-6.6814e+06
Legionella	gshB	Glutathione synthetase	NR	0	0	0	0.667	0.709	691	975	971	0	-6.68144e+06
Legionella	gapA	Glyceraldehyde-3-phosphate dehydrogenase 1	NR	0	0	0	0.689	0.585	588	1005	1208	0	-6.68152e+06
Legionella	xthA	Exodeoxyribonuclease III	NR	0	0	0	0.733	0.701	597	852	1245	0	-6.6816e+06
Legionella	?	hypothetical protein	NR	0	0	0	0.644	0.757	561	741	868	0	-6.68192e+06
Legionella	?	hypothetical protein	NR	0	0	0	0.644	0.672	375	558	925	0	-6682126
Legionella	thiL	Thiamine-monophosphate kinase	NR	0	0	0	0.6	0.774	834	1077	1143	0	-6.68232e+06
Legionella	?	hypothetical protein	NR	0	0	0	0.6	0.46	268	582	1201	0	-6.68236e+06
Legionella	rplX	50S ribosomal protein L24	CR	0	0	1	0.6	0.667	222	333	995	0	-6.68245e+06
Legionella	rplJ	50S ribosomal protein L10	CR	0	0	0	0.533	0.565	300	531	1204	0	-6.68252e+06
Legionella	?	hypothetical protein	NR	0	0	0	0.689	0.5	354	708	951	0	-6682920
Legionella	clpS	ATP-dependent Clp protease adapter protein ClpS	NR	0	0	1	0.578	0.649	220	339	846	0	-6.68293e+06
Legionella	?	hypothetical protein	NR	0	0	0	0.6	0.839	239	285	965	0	-6.68294e+06
Legionella	holC	DNA polymerase III subunit chi	NR	0	0	0	0.556	0.675	336	498	923	0	-6.68318e+06
Legionella	orn	Oligoribonuclease	NR	0	0	0	0.556	0.604	355	588	1052	0	-6.6832e+06
Legionella	rnfB	Electron transport complex protein rnfB	NR	0	0	0	0.644	0.715	472	660	1039	0	-6.68376e+06
Legionella	?	Dot/Icm secretion system protein (dot_icm_IcmQ)	NR	0	0	0	0.622	0.795	584	735	966	0	-6.68422e+06
Legionella	?	cell division protein FtsL	NR	0	0	0	0.733	0.713	246	345	1151	0	-6.68433e+06
Legionella	?	Sel1 repeat protein	NR	0	0	0	0.511	0.693	318	459	1148	0	-6.68438e+06
Legionella	?	transcriptional regulator BolA	NR	0	0	0	0.556	0.741	280	378	839	0	-6684983
Legionella	?	hypothetical protein	NR	0	0	0	0.6	0.486	420	864	952	0	-6685407
Legionella	?	hypothetical protein	NR	0	0	0	0.289	0.723	141	195	1196	0	-6.68561e+06
Legionella	ndk	Nucleoside diphosphate kinase	NR	0	0	0	0.511	0.5	249	498	1122	0	-6685948
Legionella	ppa	Inorganic pyrophosphatase	NR	0	0	1	0.644	0.598	364	609	1011	0	-6.68627e+06
Legionella	hfq	RNA-binding protein Hfq	NR	0	0	1	0.244	0.678	175	258	1192	0	-6.68634e+06
Legionella	rpsR	30S ribosomal protein S18	CR	0	0	1	0.533	0.584	135	231	1133	0	-6.68648e+06
Legionella	rplL	50S ribosomal protein L7/L12	CR	0	0	1	0.489	0.548	207	378	1205	0	-6.68687e+06
Legionella	rplC	50S ribosomal protein L3	CR	0	0	0	0.644	0.618	406	657	1003	0	-6.68714e+06
Legionella	rpsB	30S ribosomal protein S2	CR	0	0	0	0.622	0.527	408	774	1106	0	-6.68788e+06
Legionella	engB	putative GTP-binding protein EngB	NR	0	0	0	0.756	0.695	486	699	1120	0	-6.68838e+06
Legionella	nth	Endonuclease III	NR	0	0	0	0.578	0.683	463	678	1040	0	-6.68853e+06
Legionella	rplS	50S ribosomal protein L19	CR	0	0	0	0.556	0.5	183	366	978	0	-6.68916e+06
Legionella	?	hypothetical protein	NR	0	0	0	0.578	0.609	351	576	1082	0	-6.6892e+06
Legionella	mlaA	putative phospholipid-binding lipoprotein MlaA precursor	NR	0	0	0	0.711	0.689	703	1020	1252	0	-6.68924e+06
Legionella	?	hypothetical protein	NR	0	0	0	0.556	0.635	200	315	1094	0	-6.68938e+06
Legionella	folB	Dihydroneopterin aldolase	NR	0	0	0	0.556	0.692	359	519	1234	0	-6.68982e+06
Legionella	erpA	Iron-sulfur cluster insertion protein ErpA	NR	0	0	1	0.6	0.6	277	462	1086	0	-6.69035e+06
Legionella	rplF	50S ribosomal protein L6	CR	0	0	1	0.6	0.637	344	540	992	0	-6.69043e+06
Legionella	rplE	50S ribosomal protein L5	CR	0	0	0	0.689	0.525	293	558	994	0	-6.69057e+06
Legionella	spmB	Spore maturation protein B	NR	0	0	0	0.533	0.602	325	540	920	0	-6.69073e+06
Legionella	groS	10 kDa chaperonin	NR	0	0	0	0.489	0.498	145	291	1167	0	-6.69094e+06
Legionella	gcvPA	putative glycine dehydrogenase (decarboxylating) subunit 1	NR	0	0	0	0.756	0.657	907	1380	1177	0	-6.69248e+06
Legionella	?	hypothetical protein	NR	0	0	0	0.533	0.704	340	483	1144	0	-6.6934e+06
Legionella	rplK	50S ribosomal protein L11	CR	0	0	0	0.533	0.506	223	441	1202	0	-6.69446e+06
Legionella	tatC	Sec-independent protein translocase protein TatC	NR	0	0	0	0.733	0.653	609	933	1198	0	-6.6952e+06
Legionella	rplI	50S ribosomal protein L9	CR	0	0	0	0.578	0.638	285	447	1132	0	-6.69548e+06
Legionella	hutU	Urocanate hydratase	NR	0	0	0	0.622	0.642	1284	2001	1084	0	-6.69559e+06
Legionella	pepP	Xaa-Pro aminopeptidase	NR	0	0	0	0.733	0.716	973	1359	1140	0	-6.6978e+06
Legionella	?	hypothetical protein	NR	0	0	0	0.8	0.768	470	612	1113	0	-6.69826e+06
Legionella	?	hypothetical protein	NR	0	0	0	0.556	0.436	212	486	906	0	-6.69841e+06
Legionella	ywlC_1	Threonylcarbamoyl-AMP synthase	NR	0	0	0	0.511	0.538	357	663	1100	0	-6.69844e+06
Legionella	pasI	Persistence and stress-resistance antitoxin PasI	NR	0	0	0	0.556	0.749	256	342	982	0	-6.69854e+06
Legionella	acpXL	Acyl carrier protein AcpXL	NR	0	0	0	0.6	0.603	248	411	983	0	-6.6986e+06
Legionella	mltB_2	Membrane-bound lytic murein transglycosylase B precursor	NR	0	0	0	0.6	0.608	622	1023	1136	0	-6.69903e+06
Legionella	rpsJ	30S ribosomal protein S10	CR	0	0	0	0.511	0.435	141	324	1004	0	-6.69958e+06
Legionella	?	hypothetical protein	NR	0	0	0	0.556	0.653	394	603	1074	0	-6.69961e+06
Legionella	cymR	HTH-type transcriptional regulator CymR	NR	0	0	0	0.622	0.633	298	471	902	0	-6.69981e+06
Legionella	?	hypothetical protein	NR	0	0	0	0.556	0.873	448	513	955	0	-6.7001e+06
Legionella	secG	Protein-export membrane protein SecG	NR	0	0	0	0.511	0.598	199	333	1026	0	-6.70065e+06
Legionella	rpsU	30S ribosomal protein S21	CR	1	0	0	0.356	0.459	113	246	1232	0	-6.70096e+06
Legionella	?	Bacterial type II secretion system protein I/J	NR	0	0	0	0.556	0.716	391	546	858	0	-6.70195e+06
Legionella	rpsH	30S ribosomal protein S8	CR	0	0	0	0.556	0.58	266	459	993	0	-6.70219e+06
Legionella	bcp	Putative peroxiredoxin bcp	NR	1	0	0	0.511	0.713	353	495	960	0	-6.70368e+06
Legionella	nuoB	NADH-quinone oxidoreductase subunit B	NR	0	0	0	0.556	0.429	207	483	1024	0	-6.70392e+06
Legionella	rplQ	50S ribosomal protein L17	CR	0	0	0	0.622	0.576	223	387	984	0	-6.70423e+06
Legionella	?	hypothetical protein	NR	0	0	0	0.556	0.631	322	510	1145	0	-6.70482e+06
Legionella	ubiC	Chorismate pyruvate-lyase	NR	0	0	0	0.467	0.693	501	723	1096	0	-6706507
Legionella	?	hypothetical protein	NR	0	0	0	0.467	0.648	352	543	1034	0	-6.70771e+06
Legionella	?	YGGT family protein	NR	0	0	0	0.689	0.799	494	618	1156	0	-6.70806e+06
Legionella	dapD	2,3,4,5-tetrahydropyridine-2,6-dicarboxylate N-succinyltransferase	NR	0	0	0	0.689	0.541	513	948	1146	0	-6.70863e+06
Legionella	rsbV	Anti-sigma-B factor antagonist	NR	0	0	0	0.533	0.804	258	321	840	0	-6.70863e+06
Legionella	?	Bacterial membrane flanked domain protein	NR	0	0	0	0.444	0.696	351	504	954	0	-6708964
Legionella	?	hypothetical protein	NR	0	0	0	0.511	0.672	1736	2583	1070	0	-6.70928e+06
Legionella	rplR	50S ribosomal protein L18	CR	0	0	1	0.556	0.71	264	372	991	0	-6.71021e+06
Legionella	rpmB	50S ribosomal protein L28	CR	0	0	0	0.578	0.573	134	234	938	0	-6.71071e+06
Legionella	frr	Ribosome-recycling factor	NR	0	0	0	0.533	0.568	315	555	1108	0	-6.71191e+06
Legionella	rplA	50S ribosomal protein L1	CR	0	0	0	0.6	0.633	439	693	1203	0	-6.71199e+06
Legionella	?	HIT-like protein	NR	0	0	1	0.422	0.676	229	339	883	0	-6712308
Legionella	rplV	50S ribosomal protein L22	CR	0	0	0	0.556	0.542	182	336	1000	0	-6.71285e+06
Legionella	?	hypothetical protein	NR	0	0	0	0.622	0.758	291	384	1191	0	-6.71305e+06
Legionella	rplP	50S ribosomal protein L16	CR	0	0	0	0.489	0.438	180	411	998	0	-6.71422e+06
Legionella	minE	Cell division topological specificity factor	NR	0	0	0	0.622	0.581	157	270	1139	0	-6.7143e+06
Legionella	lolA	Outer-membrane lipoprotein carrier protein precursor	NR	0	0	0	0.733	0.731	452	618	1217	0	-6.71477e+06
Legionella	rpsF	30S ribosomal protein S6	CR	0	0	0	0.6	0.524	198	378	1134	0	-6.71525e+06
Legionella	?	Membrane fusogenic activity	NR	0	0	0	0.467	0.677	197	291	947	0	-6.71549e+06
Legionella	coaX	Type III pantothenate kinase	NR	0	0	0	0.644	0.589	534	906	1149	0	-6.71564e+06
Legionella	?	chaperone-modulator protein CbpM	NR	0	0	0	0.511	0.799	278	348	865	0	-6.71584e+06
Legionella	rpsT	30S ribosomal protein S20	CR	0	0	0	0.533	0.538	142	264	924	0	-6715945
Legionella	feoA	Ferrous iron transport protein A	NR	0	0	0	0.444	0.73	208	285	1078	0	-6716220
Legionella	rpsM	30S ribosomal protein S13	CR	0	0	0	0.556	0.568	201	354	988	0	-6.71651e+06
Legionella	pdhB_2	Pyruvate dehydrogenase E1 component subunit beta	NR	0	0	0	0.8	0.632	1472	2328	1124	0	-6.71761e+06
Legionella	rnhA	Ribonuclease HI	NR	0	0	0	0.489	0.616	294	477	1085	0	-6.71761e+06
Legionella	?	hypothetical protein	NR	0	0	0	0.489	0.79	519	657	1044	0	-6.71895e+06
Legionella	?	hypothetical protein	NR	0	0	0	0.422	0.658	296	450	1065	0	-6.71949e+06
Legionella	rpsE	30S ribosomal protein S5	CR	0	0	0	0.489	0.537	277	516	990	0	-6.7205e+06
Legionella	nuoI	NADH-quinone oxidoreductase subunit I	NR	0	0	0	0.467	0.564	281	498	1019	0	-6.72051e+06
Legionella	rpsL	30S ribosomal protein S12	CR	0	0	0	0.4	0.402	152	378	1206	0	-6.72282e+06
Legionella	?	hypothetical protein	NR	0	0	0	0.511	0.652	221	339	1251	0	-6.72468e+06
Legionella	?	hypothetical protein	NR	0	0	0	0.556	0.496	192	387	898	0	-6.72562e+06
Legionella	rpsI	30S ribosomal protein S9	CR	0	0	0	0.511	0.576	247	429	1063	0	-6.72594e+06
Legionella	comEA	ComE operon protein 1	NR	0	0	0	0.467	0.709	287	405	851	0	-6725977
Legionella	infC	Translation initiation factor IF-3	NR	0	0	0	0.422	0.421	240	570	1059	0	-6.72737e+06
Legionella	rpsP	30S ribosomal protein S16	CR	0	0	0	0.467	0.598	156	261	975	0	-6.72764e+06
Legionella	?	Putative pterin-4-alpha-carbinolamine dehydratase	NR	0	0	0	0.356	0.62	212	342	826	0	-6.72825e+06
Legionella	fadM	Long-chain acyl-CoA thioesterase FadM	NR	0	0	0	0.511	0.715	341	477	1043	0	-6.72831e+06
Legionella	ruvB	Holliday junction ATP-dependent DNA helicase RuvB	NR	0	0	0	0.756	0.486	580	1194	1128	0	-6.72849e+06
Legionella	rpsK	30S ribosomal protein S11	CR	0	0	0	0.444	0.482	191	396	987	0	-6.73019e+06
Legionella	?	Integral membrane protein TerC family protein	NR	0	0	0	0.689	0.646	504	780	1118	0	-6.73084e+06
Legionella	?	hypothetical protein	NR	0	0	0	0.511	0.618	352	570	1081	0	-6.73272e+06
Legionella	?	hypothetical protein	NR	0	0	0	0.556	0.5	216	432	1231	0	-6.73389e+06
Legionella	gpsA	Glycerol-3-phosphate dehydrogenase [NAD(P)+]	NR	0	0	0	0.667	0.686	778	1134	1229	0	-6.73441e+06
Legionella	?	hypothetical protein	NR	0	0	0	0.533	0.602	159	264	968	0	-6.73501e+06
Legionella	23S	23S rRNA gene	rRNA	0	1	0	0.556	0.188	558	2975	NA	0	-6.73649e+06
Legionella	rpmC	50S ribosomal protein L29	CR	0	0	1	0.467	0.714	152	213	997	0	-6.74048e+06
Legionella	rplT	50S ribosomal protein L20	CR	0	0	0	0.511	0.474	179	378	1060	0	-6.74511e+06
Legionella	bamE	Outer membrane protein assembly factor BamE precursor	NR	0	0	0	0.467	0.671	290	432	981	0	-6.746e+06
Legionella	rpsO	30S ribosomal protein S15	CR	0	0	0	0.556	0.604	165	273	1012	0	-6.74837e+06
Legionella	?	FeoC like transcriptional regulator	NR	0	0	0	0.444	0.714	182	255	1079	0	-6.74866e+06
Legionella	?	hypothetical protein	NR	0	0	0	0.422	0.545	188	345	967	0	-6.74909e+06
Legionella	pdxB	Erythronate-4-phosphate dehydrogenase	NR	0	0	0	0.689	0.814	911	1119	1110	0	-6.74956e+06
Legionella	rpmA	50S ribosomal protein L27	CR	0	0	0	0.4	0.559	156	279	928	0	-6751355
Legionella	rpsQ	30S ribosomal protein S17	CR	0	0	0	0.4	0.583	147	252	996	0	-6.75291e+06
Legionella	smg	Protein Smg	NR	0	0	0	0.6	0.747	363	486	1173	0	-6.75412e+06
Legionella	rplU	50S ribosomal protein L21	CR	0	0	0	0.467	0.566	175	309	929	0	-6.75642e+06
Legionella	rpsG	30S ribosomal protein S7	CR	0	0	0	0.578	0.521	317	609	1207	0	-6.75742e+06
Legionella	?	hypothetical protein	NR	0	0	0	0.467	0.589	274	465	979	0	-6.75865e+06
Legionella	dapA	4-hydroxy-tetrahydrodipicolinate synthase	NR	0	0	0	0.667	0.574	582	1014	1170	0	-6.75933e+06
Legionella	rlmB	23S rRNA (guanosine-2'-O-)-methyltransferase RlmB	NR	0	0	0	0.622	0.662	542	819	1179	0	-6.76214e+06
Legionella	ybaB	Nucleoid-associated protein YbaB	NR	0	0	1	0.444	0.609	221	363	1009	0	-6.7628e+06
Legionella	groL	60 kDa chaperonin	NR	0	0	0	0.6	0.457	758	1659	1168	0	-6.76304e+06
Legionella	?	Ferredoxin 1	NR	0	0	0	0.4	0.55	183	333	892	0	-6.77025e+06
Legionella	rplW	50S ribosomal protein L23	CR	0	0	1	0.311	0.595	175	294	1002	0	-6.77197e+06
Legionella	?	putative Fe(2+)-trafficking protein	NR	0	0	1	0.422	0.522	191	366	893	0	-6.77208e+06
Legionella	?	Zinc-finger domain protein	NR	0	0	0	0.333	0.627	141	225	1069	0	-6.77759e+06
Legionella	rpmD	50S ribosomal protein L30	CR	0	0	1	0.333	0.672	129	192	989	0	-6.78181e+06
Legionella	efp	Elongation factor P	NR	0	1	0	0.467	0.589	334	567	881	0	-6.7864e+06
Legionella	?	RNA-binding protein	NR	0	0	0	0.422	0.526	251	477	1028	0	-6.79667e+06
Legionella	?	hypothetical protein	NR	0	0	0	0.356	0.728	142	195	953	0	-6.79956e+06
Legionella	?	Yqey-like protein	NR	0	0	0	0.556	0.607	295	486	1233	0	-6.80322e+06
Legionella	?	hypothetical protein	NR	0	0	0	0.244	0.671	163	243	946	0	-6.80644e+06
Legionella	hspQ	Heat shock protein HspQ	NR	0	0	0	0.6	0.585	302	516	1197	0	-6.81051e+06
Legionella	16S	16S rRNA gene	rRNA	1	1	0	0.4	0.158	235	1483	NA	0	-6.84278e+06
Legionella	rpoB*	Ogier et al. (2019) rpoB region	rpo	0	0	0	0.333	0.413	179	433	NA	0	-6.87208e+06
Legionella	coq7	2-nonaprenyl-3-methyl-6-methoxy-1,4-benzoquinol hydroxylase	NR	0	0	0	0.689	0.714	465	651	1194	0	-6.92556e+06
Legionella	rpmG	50S ribosomal protein L33	CR	0	0	1	0.244	0.69	116	168	939	0	-6927783
Legionella	rpmF	50S ribosomal protein L32	CR	0	0	1	0.267	0.565	117	207	1088	0	-7006278
Legionella	16S	16S V1-2	rRNA	0	0		0.2	0.204	68	334	NA	0	-7.06844e+06
Legionella	16S	16S V4	rRNA	0	0		0.156	0.165	45	273	NA	0	-7.23262e+06
Legionella	16S	16S V8	rRNA		0		0.022	0.152	26	171	NA	0	-7.26246e+06
Legionella	16S	16S V5	rRNA		0		0.156	0.14	17	121	NA	0	-7.26596e+06
Legionella	16S-Mask	16S rRNA gene-Masked	rRNA	1	1		0.2	0.068	90	1332	NA	0	-7.55301e+06
Legionella	16S	16S V3-V4	rRNA	0	0		0.111	0.173	78	450	NA	0	-7.62844e+06
Legionella	16S	16S V7	rRNA		0		0.111	0.164	20	122	NA	0	-7.68924e+06
Legionella	16S-Mask	16S V4-Mask	rRNA		0		0.022	0.062	15	243	NA	0	-7713303
Legionella	16S-Mask	16S V3-Masked	rRNA		0		0.067	0.089	14	158	NA	0	-7.73888e+06
Legionella	5S	5S rRNA gene	rRNA		0	0	0.133	0.283	34	120	NA	0	-7795303
Legionella	16S	16S V6	rRNA		0		0.067	0.109	21	192	NA	0	-7813815
Legionella	16S-Mask	16S V3-V4-Masked	rRNA	0	0		0.067	0.075	30	402	NA	0	-7.87255e+06
Legionella	16S	16S V3	rRNA		0		0.089	0.186	33	177	NA	0	-7.92055e+06

## Sheet: Table S4d
Title:	Gene characteristics, gene product, concordance, and recombination/HGT results for all Staphylococcus intra-genus level loci
Legend:	For all Staphylococcus core genes, rRNA genes, 16S rRNA gene hypervariable regions, masked alignments, and rpoB partial sequence based on primers published by Ogier et al. (2019): gene identifier, gene product, gene category, recombination/HGT results (PHI, SBP, HGTector, phylogenetic HGT), concordance, SNP proportion, SNP count, gene length, cluster number, approximately unbiased result, and log…
Genus	Gene	Gene product	Gene category	PHI	SBP	HGT (HGTector or phylogenetic HGT)	Concordance (%)	SNPs (%)	SNPs (#)	nt (#)	Cluster number	AU	LogL
Staphylococcus	?	hypothetical protein	NR	0	1	0	1	0.784	2305	2940	997	1	-5.91485e+06
Staphylococcus	recJ	Single-stranded-DNA-specific exonuclease RecJ	NR	1	0	0	0.971	0.73	1702	2331	934	0	-5.91585e+06
Staphylococcus	?	hypothetical protein	NR	0	0	0	0.941	0.684	1014	1482	696	0	-5.91752e+06
Staphylococcus	?	Putative dipeptidase	NR	0	0	0	0.882	0.632	900	1425	978	0	-5.91895e+06
Staphylococcus	?	Farnesyl diphosphate synthase	NR	1	0	0	0.853	0.729	656	900	852	0	-5.91895e+06
Staphylococcus	mcsB	Protein-arginine kinase	NR	0	0	0	0.882	0.68	700	1029	1178	0	-5.919e+06
Staphylococcus	smc	Chromosome partition protein Smc	NR	0	1	0	0.882	0.728	2600	3573	759	0	-5.91937e+06
Staphylococcus	?	hypothetical protein	NR	1	0	0	0.912	0.733	2001	2730	781	0	-5.91941e+06
Staphylococcus	pnp	Polyribonucleotide nucleotidyltransferase	NR	1	0	0	0.882	0.544	1148	2112	639	0	-5.91995e+06
Staphylococcus	tagH_2	Teichoic acids export ATP-binding protein TagH	NR	0	0	0	0.882	0.845	1320	1563	679	0	-5.92013e+06
Staphylococcus	hrcA	Heat-inducible transcription repressor HrcA	NR	0	0	1	0.882	0.765	757	990	908	0	-5920887
Staphylococcus	ftsA	Cell division protein FtsA	NR	0	0	0	0.853	0.594	914	1539	733	0	-5.9209e+06
Staphylococcus	rnr	Ribonuclease R	NR	0	1	0	0.882	0.611	1469	2406	609	0	-5.92124e+06
Staphylococcus	pyk	Pyruvate kinase	NR	0	0	0	0.882	0.567	997	1758	956	0	-5.92152e+06
Staphylococcus	ligA	DNA ligase	NR	0	0	0	0.912	0.617	1238	2007	1014	0	-5.9216e+06
Staphylococcus	mutS_1	DNA mismatch repair protein MutS	NR	0	0	0	0.882	0.585	1731	2958	725	0	-5.92167e+06
Staphylococcus	?	Gluconeogenesis factor	NR	0	0	0	0.824	0.656	697	1062	602	0	-5.92268e+06
Staphylococcus	rny	Ribonuclease Y	NR	0	1	0	0.824	0.474	739	1560	793	0	-5.92278e+06
Staphylococcus	mutL	DNA mismatch repair protein MutL	NR	0	0	0	0.853	0.579	1505	2601	797	0	-5.92304e+06
Staphylococcus	potB	Spermidine/putrescine transport system permease protein PotB	NR	0	0	0	0.853	0.67	543	810	702	0	-5.92305e+06
Staphylococcus	?	hypothetical protein	NR	0	0	0	0.882	0.641	1104	1722	747	0	-5.92313e+06
Staphylococcus	?	hypothetical protein	NR	0	0	0	0.882	0.626	595	951	964	0	-5.92369e+06
Staphylococcus	?	hypothetical protein	NR	0	1	0	0.824	0.818	1190	1455	599	0	-5.92441e+06
Staphylococcus	hom	Homoserine dehydrogenase	NR	0	1	0	0.794	0.571	831	1455	805	0	-5.92476e+06
Staphylococcus	recF	DNA replication and repair protein RecF	NR	0	0	0	0.882	0.582	650	1116	1130	0	-5.92477e+06
Staphylococcus	pepT_1	Peptidase T	NR	0	0	0	0.882	0.661	827	1251	868	0	-5.92479e+06
Staphylococcus	yhaO	putative metallophosphoesterase YhaO	NR	0	0	0	0.882	0.697	834	1197	814	0	-5.92479e+06
Staphylococcus	?	hypothetical protein	NR	0	0	1	0.824	0.784	656	837	947	0	-5.92483e+06
Staphylococcus	dnaG	DNA primase	NR	0	1	0	0.853	0.711	1341	1887	890	0	-5.92488e+06
Staphylococcus	mreC	Cell shape-determining protein MreC	NR	0	0	0	0.853	0.713	629	882	942	0	-5.92489e+06
Staphylococcus	rnc	Ribonuclease 3	NR	0	0	0	0.824	0.645	480	744	758	0	-5.92505e+06
Staphylococcus	dnaA	Chromosomal replication initiator protein DnaA	NR	0	1	0	0.824	0.607	845	1392	1133	0	-5925110
Staphylococcus	msrR	Regulatory protein MsrR	NR	1	0	0	0.912	0.686	722	1053	677	0	-5925189
Staphylococcus	?	hypothetical protein	NR	0	0	1	0.853	0.835	333	399	790	0	-5.92528e+06
Staphylococcus	modB	Molybdenum transport system permease protein ModB	NR	0	0	0	0.824	0.659	441	669	703	0	-5.92542e+06
Staphylococcus	?	hypothetical protein	NR	0	0	1	0.794	0.748	415	555	612	0	-5.92544e+06
Staphylococcus	recN	DNA repair protein RecN	NR	0	1	0	0.853	0.633	1068	1686	760	0	-5.92551e+06
Staphylococcus	pabB	Aminodeoxychorismate synthase component 1	NR	0	1	0	0.794	0.66	1211	1836	672	0	-5.92568e+06
Staphylococcus	ywpJ_2	Phosphatase YwpJ	NR	0	0	0	0.853	0.759	672	885	644	0	-5.92578e+06
Staphylococcus	?	putative uridylyltransferase	NR	0	0	0	0.853	0.703	858	1221	1065	0	-5.92585e+06
Staphylococcus	garK_1	Glycerate 2-kinase	NR	0	0	0	0.824	0.737	845	1146	1119	0	-5.92587e+06
Staphylococcus	?	hypothetical protein	NR	0	0	0	0.824	0.853	827	969	949	0	-5.9261e+06
Staphylococcus	dnaK	Chaperone protein DnaK	NR	1	0	0	0.853	0.455	845	1857	906	0	-5.92619e+06
Staphylococcus	murD	UDP-N-acetylmuramoylalanine--D-glutamate ligase	NR	0	0	0	0.794	0.615	828	1347	659	0	-5.9262e+06
Staphylococcus	?	hypothetical protein	NR	0	0	1	0.853	0.922	487	528	723	0	-5.92627e+06
Staphylococcus	menD	2-succinyl-5-enolpyruvyl-6-hydroxy-3- cyclohexene-1-carboxylate synthase	NR	0	0	0	0.824	0.71	1209	1704	673	0	-5.92627e+06
Staphylococcus	sufB_1	FeS cluster assembly protein SufB	NR	0	0	0	0.794	0.588	773	1314	619	0	-5.92634e+06
Staphylococcus	tagO	putative undecaprenyl-phosphate N-acetylglucosaminyl 1-phosphate transferase	NR	0	0	0	0.853	0.575	685	1191	732	0	-5926345
Staphylococcus	ezrA	Septation ring formation regulator EzrA	NR	1	1	0	0.824	0.657	1122	1707	966	0	-5.92644e+06
Staphylococcus	pitA_1	Low-affinity inorganic phosphate transporter 1	NR	1	0	0	0.794	0.541	549	1014	1212	0	-5.92653e+06
Staphylococcus	dnaX_2	DNA polymerase III subunit gamma/tau	NR	0	0	0	0.794	0.712	664	933	1149	0	-5.92665e+06
Staphylococcus	gcvPA	putative glycine dehydrogenase (decarboxylating) subunit 1	NR	1	1	0	0.794	0.585	790	1350	880	0	-5.92673e+06
Staphylococcus	ytgP_1	putative cell division protein YtgP	NR	0	0	0	0.853	0.766	1270	1659	980	0	-5.92673e+06
Staphylococcus	pepA_1	Cytosol aminopeptidase	NR	0	0	0	0.882	0.786	1242	1581	634	0	-5.92689e+06
Staphylococcus	ctaB2	Protoheme IX farnesyltransferase 2	NR	0	0	0	0.912	0.601	559	930	707	0	-5.927e+06
Staphylococcus	gcvT	Aminomethyltransferase	NR	0	0	0	0.824	0.649	709	1092	881	0	-5.92719e+06
Staphylococcus	?	hypothetical protein	NR	0	0	0	0.794	0.445	513	1152	792	0	-5.92724e+06
Staphylococcus	hssS	Heme sensor protein HssS	NR	0	0	0	0.794	0.776	1111	1431	827	0	-5.92724e+06
Staphylococcus	murC	UDP-N-acetylmuramate--L-alanine ligase	NR	0	0	0	0.794	0.604	795	1317	660	0	-5.9274e+06
Staphylococcus	cobT	Aerobic cobaltochelatase subunit CobT	NR	0	1	0	0.853	0.7	1337	1911	825	0	-5.92763e+06
Staphylococcus	mnmE	tRNA modification GTPase MnmE	NR	0	0	0	0.824	0.536	748	1395	856	0	-5.92765e+06
Staphylococcus	gdpP	Cyclic-di-AMP phosphodiesterase GdpP	NR	0	1	0	0.824	0.583	1156	1983	961	0	-5.92781e+06
Staphylococcus	purH	Bifunctional purine biosynthesis protein PurH	NR	0	0	0	0.794	0.61	901	1476	693	0	-5.92782e+06
Staphylococcus	thiM	Hydroxyethylthiazole kinase	NR	0	0	0	0.794	0.751	604	804	1044	0	-5.92788e+06
Staphylococcus	cggR	Central glycolytic genes regulator	NR	0	0	0	0.853	0.663	686	1035	605	0	-5.92792e+06
Staphylococcus	pgl	6-phosphogluconolactonase	NR	0	0	0	0.794	0.718	834	1161	1023	0	-5.92805e+06
Staphylococcus	?	hypothetical protein	NR	0	0	0	0.794	0.671	658	981	1003	0	-5.92813e+06
Staphylococcus	carB	Carbamoyl-phosphate synthase large chain	NR	0	0	0	0.794	0.505	1600	3171	705	0	-5.9284e+06
Staphylococcus	polX	DNA polymerase/3'-5' exonuclease PolX	NR	0	0	0	0.794	0.653	1144	1752	724	0	-5928476
Staphylococcus	?	hypothetical protein	NR	0	0	0	0.794	0.617	820	1329	635	0	-5928771
Staphylococcus	?	Nucleotide-binding protein	NR	0	0	0	0.824	0.644	618	960	601	0	-5.92878e+06
Staphylococcus	hemA	Glutamyl-tRNA reductase	NR	0	1	0	0.882	0.652	906	1389	948	0	-5.92896e+06
Staphylococcus	ppaC	putative manganese-dependent inorganic pyrophosphatase	NR	0	0	0	0.824	0.646	603	933	1022	0	-5.92911e+06
Staphylococcus	?	Putative phosphatase	NR	0	0	0	0.794	0.762	626	822	643	0	-5.92942e+06
Staphylococcus	pchA	Salicylate biosynthesis isochorismate synthase	NR	1	0	0	0.824	0.756	1070	1416	671	0	-5.92948e+06
Staphylococcus	?	hypothetical protein	NR	0	0	0	0.824	0.788	964	1224	994	0	-5.92956e+06
Staphylococcus	alr1_2	Alanine racemase 1	NR	0	0	0	0.853	0.764	880	1152	821	0	-5.92967e+06
Staphylococcus	ribF	Riboflavin biosynthesis protein RibF	NR	0	0	0	0.765	0.634	618	975	788	0	-5.92975e+06
Staphylococcus	?	PhoH-like protein	NR	1	0	0	0.824	0.564	535	948	897	0	-5.92993e+06
Staphylococcus	?	hypothetical protein	NR	0	0	0	0.765	0.845	451	534	1206	0	-5.93014e+06
Staphylococcus	ppaX	Pyrophosphatase PpaX	NR	0	0	0	0.824	0.824	618	750	1146	0	-5.93015e+06
Staphylococcus	?	hypothetical protein	NR	0	0	0	0.912	0.632	324	513	1210	0	-5.93071e+06
Staphylococcus	?	hypothetical protein	NR	0	1	0	0.824	0.816	952	1167	714	0	-5.93071e+06
Staphylococcus	?	hypothetical protein	NR	0	0	0	0.824	0.599	379	633	1017	0	-5.93101e+06
Staphylococcus	?	hypothetical protein	NR	0	0	0	0.765	0.703	542	771	823	0	-5.93114e+06
Staphylococcus	dosC	Diguanylate cyclase DosC	NR	0	0	0	0.765	0.698	756	1083	1221	0	-5.93131e+06
Staphylococcus	?	hypothetical protein	NR	0	0	0	0.794	0.704	851	1209	1148	0	-5.93135e+06
Staphylococcus	sbcD	Nuclease SbcCD subunit D	NR	0	0	0	0.824	0.795	901	1134	813	0	-5.93137e+06
Staphylococcus	ugtP	Processive diacylglycerol beta-glucosyltransferase	NR	0	1	0	0.765	0.628	738	1176	656	0	-5.93147e+06
Staphylococcus	rlmN	putative dual-specificity RNA methyltransferase RlmN	NR	0	0	0	0.794	0.497	543	1092	750	0	-5.93149e+06
Staphylococcus	clpX	ATP-dependent Clp protease ATP-binding subunit ClpX	NR	1	0	0	0.794	0.482	609	1263	773	0	-5.9315e+06
Staphylococcus	pfkA	ATP-dependent 6-phosphofructokinase	NR	0	0	0	0.824	0.571	553	969	957	0	-5.93155e+06
Staphylococcus	?	Putative O-methyltransferase/MSMEI 4947	NR	0	0	0	0.765	0.706	483	684	921	0	-5.93159e+06
Staphylococcus	lgt	Prolipoprotein diacylglyceryl transferase	NR	0	0	0	0.853	0.674	584	867	597	0	-5.932e+06
Staphylococcus	?	hypothetical protein	NR	0	0	0	0.765	0.774	806	1041	1128	0	-5.9322e+06
Staphylococcus	?	hypothetical protein	NR	0	0	0	0.765	0.672	597	888	975	0	-5932234
Staphylococcus	murF	UDP-N-acetylmuramoyl-tripeptide--D-alanyl-D- alanine ligase	NR	0	1	0	0.824	0.711	988	1389	658	0	-5932245
Staphylococcus	yitJ	Bifunctional homocysteine S-methyltransferase/5,10-methylenetetrahydrofolate reductase	NR	0	0	0	0.765	0.65	1204	1851	1138	0	-5.93238e+06
Staphylococcus	rsmB	Ribosomal RNA small subunit methyltransferase B	NR	0	0	0	0.765	0.725	963	1329	749	0	-5.93251e+06
Staphylococcus	?	hypothetical protein	NR	0	0	0	0.794	0.788	253	321	1100	0	-5.93252e+06
Staphylococcus	aroC	Chorismate synthase	NR	0	0	0	0.765	0.594	693	1167	849	0	-5932530
Staphylococcus	mazG	Nucleoside triphosphate pyrophosphohydrolase/pyrophosphatase MazG	NR	0	0	0	0.794	0.711	872	1227	1167	0	-5.93259e+06
Staphylococcus	yrrB	TPR repeat-containing protein YrrB	NR	0	0	0	0.735	0.74	504	681	926	0	-5.9326e+06
Staphylococcus	pncB2	Nicotinate phosphoribosyltransferase pncB2	NR	0	0	0	0.853	0.575	851	1479	1019	0	-5.93263e+06
Staphylococcus	yycH	Two-component system YycF/YycG regulatory protein YycH	NR	0	0	0	0.765	0.844	1157	1371	1126	0	-5.93263e+06
Staphylococcus	ruvB	Holliday junction ATP-dependent DNA helicase RuvB	NR	0	0	0	0.765	0.568	579	1020	928	0	-5.93266e+06
Staphylococcus	tsaB	tRNA threonylcarbamoyladenosine biosynthesis protein TsaB	NR	0	0	0	0.824	0.76	522	687	1031	0	-5.93268e+06
Staphylococcus	hemN	Oxygen-independent coproporphyrinogen-III oxidase-like protein YqeR	NR	0	0	0	0.765	0.666	775	1164	909	0	-5.93269e+06
Staphylococcus	atpG	ATP synthase gamma chain	NR	0	0	0	0.765	0.636	553	870	1047	0	-5.93271e+06
Staphylococcus	speA	Arginine decarboxylase	NR	0	0	0	0.824	0.784	1098	1401	1152	0	-5.93276e+06
Staphylococcus	?	hypothetical protein	NR	0	0	0	0.794	0.654	712	1089	869	0	-5.93289e+06
Staphylococcus	mraY	Phospho-N-acetylmuramoyl-pentapeptide- transferase	NR	0	0	0	0.765	0.573	552	963	731	0	-5.9329e+06
Staphylococcus	ideR	Iron-dependent repressor IdeR	NR	0	0	0	0.824	0.703	462	657	1208	0	-5.93292e+06
Staphylococcus	rplF	50S ribosomal protein L6	CR	0	0	1	0.765	0.5	267	534	1082	0	-5932989
Staphylococcus	?	hypothetical protein	NR	0	1	0	0.794	0.632	597	945	622	0	-5.9331e+06
Staphylococcus	pcrB	Heptaprenylglyceryl phosphate synthase	NR	0	0	0	0.794	0.684	474	693	1015	0	-5.93323e+06
Staphylococcus	?	hypothetical protein	NR	0	0	0	0.765	0.667	414	621	950	0	-5.93352e+06
Staphylococcus	accA	Acetyl-coenzyme A carboxylase carboxyl transferase subunit alpha	NR	0	1	0	0.735	0.562	533	948	958	0	-5.93355e+06
Staphylococcus	pyrB	Aspartate carbamoyltransferase	NR	0	0	0	0.765	0.682	634	930	743	0	-5.93363e+06
Staphylococcus	aroK	Shikimate kinase	NR	0	0	1	0.735	0.742	414	558	882	0	-5.93363e+06
Staphylococcus	?	hypothetical protein	NR	0	0	0	0.824	0.751	577	768	653	0	-5.93378e+06
Staphylococcus	?	hypothetical protein	NR	0	0	0	0.735	0.531	692	1302	1077	0	-5.93379e+06
Staphylococcus	?	hypothetical protein	NR	0	0	0	0.706	0.779	619	795	1209	0	-5.93381e+06
Staphylococcus	cdaR	CdaA regulatory protein CdaR	NR	0	0	1	0.735	0.822	769	936	1059	0	-5.93381e+06
Staphylococcus	yycI	Two-component system YycFG regulatory protein	NR	0	0	0	0.824	0.827	670	810	1125	0	-5.93381e+06
Staphylococcus	relA	GTP pyrophosphokinase	NR	0	0	0	0.735	0.508	1122	2208	932	0	-5.93382e+06
Staphylococcus	dnaJ	Chaperone protein DnaJ	NR	0	0	0	0.824	0.581	671	1155	905	0	-5.9339e+06
Staphylococcus	hslO	33 kDa chaperonin	NR	0	0	0	0.735	0.611	544	891	1171	0	-5.934e+06
Staphylococcus	codY	GTP-sensing transcriptional pleiotropic repressor CodY	NR	0	0	0	0.824	0.527	411	780	774	0	-5.93411e+06
Staphylococcus	ribBA	Riboflavin biosynthesis protein RibBA	NR	0	0	0	0.735	0.688	832	1209	985	0	-5.93415e+06
Staphylococcus	gltX	Glutamate--tRNA ligase	NR	0	0	0	0.735	0.531	776	1461	1180	0	-5.93425e+06
Staphylococcus	carA_2	Carbamoyl-phosphate synthase small chain	NR	0	0	0	0.735	0.595	657	1104	744	0	-5934313
Staphylococcus	?	Putative zinc metalloprotease	NR	0	0	0	0.765	0.649	839	1293	779	0	-5.93433e+06
Staphylococcus	whiA	Putative sporulation transcription regulator WhiA	NR	0	0	0	0.735	0.54	510	945	603	0	-5934656
Staphylococcus	prmA	Ribosomal protein L11 methyltransferase	NR	0	0	0	0.706	0.704	663	942	902	0	-5.93466e+06
Staphylococcus	purM	Phosphoribosylformylglycinamidine cyclo-ligase	NR	0	1	0	0.765	0.631	657	1041	690	0	-5.93481e+06
Staphylococcus	?	putative epimerase/dehydratase	NR	1	0	0	0.765	0.606	604	996	1194	0	-5.93481e+06
Staphylococcus	ecfT	Energy-coupling factor transporter transmembrane protein EcfT	NR	0	0	0	0.794	0.708	569	804	695	0	-5.93499e+06
Staphylococcus	?	hypothetical protein	NR	0	0	1	0.765	0.757	393	519	828	0	-5.93506e+06
Staphylococcus	?	hypothetical protein	NR	0	1	0	0.765	0.789	895	1134	999	0	-5.93507e+06
Staphylococcus	?	Putative TrmH family tRNA/rRNA methyltransferase	NR	1	0	0	0.735	0.597	460	771	718	0	-5.93511e+06
Staphylococcus	yjlD	NADH dehydrogenase-like protein YjlD	NR	0	0	0	0.765	0.57	621	1089	630	0	-5935220
Staphylococcus	marA	Multiple antibiotic resistance protein MarA	NR	0	0	0	0.765	0.728	642	882	867	0	-5.93524e+06
Staphylococcus	?	hypothetical protein	NR	0	0	0	0.735	0.653	517	792	1157	0	-5.9353e+06
Staphylococcus	rplR	50S ribosomal protein L18	CR	0	0	0	0.794	0.508	183	360	1081	0	-5.93535e+06
Staphylococcus	rpoA	DNA-directed RNA polymerase subunit alpha	rpo	0	0	1	0.765	0.357	336	942	1071	0	-5.9354e+06
Staphylococcus	rpoC	DNA-directed RNA polymerase subunit beta'	rpo	1	0	0	0.735	0.41	1506	3642	1190	0	-5.93543e+06
Staphylococcus	aspC	Aspartate aminotransferase	NR	0	0	0	0.765	0.664	882	1329	675	0	-5935580
Staphylococcus	ribE	Riboflavin synthase	NR	0	0	0	0.735	0.713	464	651	986	0	-5.93563e+06
Staphylococcus	pdxT	Pyridoxal 5'-phosphate synthase subunit PdxT	NR	0	0	0	0.735	0.631	373	591	1175	0	-5.93564e+06
Staphylococcus	?	hypothetical protein	NR	0	0	0	0.735	0.789	459	582	995	0	-5.9357e+06
Staphylococcus	?	hypothetical protein	NR	0	0	1	0.765	0.636	485	762	907	0	-5.93573e+06
Staphylococcus	ykoC_1	Putative HMP/thiamine permease protein YkoC	NR	0	0	0	0.765	0.713	575	807	694	0	-5.93588e+06
Staphylococcus	rplC	50S ribosomal protein L3	CR	0	0	0	0.794	0.43	289	672	1096	0	-5.93596e+06
Staphylococcus	glmS	Glutamine--fructose-6-phosphate aminotransferase [isomerizing]	NR	0	0	0	0.735	0.555	1001	1803	689	0	-5.93606e+06
Staphylococcus	stp	Serine/threonine phosphatase stp	NR	0	0	0	0.765	0.699	520	744	751	0	-5.9363e+06
Staphylococcus	fabD	Malonyl CoA-acyl carrier protein transacylase	NR	0	0	0	0.794	0.642	601	936	756	0	-5.93641e+06
Staphylococcus	ctaA	Heme A synthase	NR	1	0	0	0.765	0.605	659	1089	706	0	-5.93645e+06
Staphylococcus	moeA	Molybdopterin molybdenumtransferase	NR	1	0	0	0.765	0.689	866	1257	1107	0	-5.93647e+06
Staphylococcus	purR	Pur operon repressor	NR	0	0	1	0.735	0.501	431	861	1143	0	-5.93651e+06
Staphylococcus	?	putative CtpA-like serine protease	NR	1	0	0	0.735	0.757	1215	1605	829	0	-5.93664e+06
Staphylococcus	?	hypothetical protein	NR	0	0	0	0.706	0.703	426	606	665	0	-5.93664e+06
Staphylococcus	ackA	Acetate kinase	NR	0	0	0	0.735	0.602	755	1254	871	0	-5.93666e+06
Staphylococcus	ribD	Riboflavin biosynthesis protein RibD	NR	0	0	0	0.824	0.724	806	1113	911	0	-5.93691e+06
Staphylococcus	mggB_2	Mannosylglucosyl-3-phosphoglycerate phosphatase	NR	0	0	0	0.647	0.709	946	1335	624	0	-5.93692e+06
Staphylococcus	pyrP	Uracil permease	NR	0	0	0	0.794	0.564	744	1320	741	0	-5.937e+06
Staphylococcus	glpQ1_2	putative glycerophosphoryl diester phosphodiesterase 1	NR	0	0	0	0.706	0.831	815	981	640	0	-5937052
Staphylococcus	accD	Acetyl-coenzyme A carboxylase carboxyl transferase subunit beta	NR	0	0	0	0.794	0.522	454	870	959	0	-5.93713e+06
Staphylococcus	guaB	Inosine-5'-monophosphate dehydrogenase	NR	0	0	0	0.706	0.495	728	1470	809	0	-5.9372e+06
Staphylococcus	radA	DNA repair protein RadA	NR	0	1	0	0.706	0.55	760	1383	1179	0	-5.93721e+06
Staphylococcus	hemE	Uroporphyrinogen decarboxylase	NR	0	0	0	0.765	0.605	639	1056	992	0	-5.93758e+06
Staphylococcus	thrC	Threonine synthase	NR	0	0	0	0.765	0.561	602	1074	806	0	-5.9376e+06
Staphylococcus	hepT	Heptaprenyl diphosphate synthase component 2	NR	0	1	0	0.735	0.725	711	981	851	0	-5.93766e+06
Staphylococcus	birA	Bifunctional ligase/repressor BirA	NR	0	0	0	0.794	0.743	731	984	842	0	-5.93766e+06
Staphylococcus	pgk	Phosphoglycerate kinase	NR	0	0	0	0.706	0.535	636	1188	606	0	-5.9377e+06
Staphylococcus	?	hypothetical protein	NR	0	0	1	0.794	0.675	780	1155	870	0	-5.93779e+06
Staphylococcus	atpH	ATP synthase subunit delta	NR	0	0	1	0.735	0.832	447	537	1048	0	-5.93792e+06
Staphylococcus	?	hypothetical protein	NR	0	0	0	0.706	0.658	314	477	812	0	-5.93793e+06
Staphylococcus	rlmI	Ribosomal RNA large subunit methyltransferase I	NR	0	0	0	0.765	0.665	808	1215	697	0	-5.93793e+06
Staphylococcus	?	hypothetical protein	NR	0	0	1	0.706	0.686	327	477	937	0	-5.93803e+06
Staphylococcus	?	hypothetical protein	NR	0	0	0	0.765	0.692	909	1314	1004	0	-5.93803e+06
Staphylococcus	queA	S-adenosylmethionine:tRNA ribosyltransferase-isomerase	NR	0	0	0	0.735	0.598	612	1023	936	0	-5.93823e+06
Staphylococcus	fapR	Transcription factor FapR	NR	0	0	1	0.765	0.717	428	597	755	0	-5.93827e+06
Staphylococcus	dnaI	Primosomal protein DnaI	NR	0	0	0	0.735	0.711	661	930	953	0	-5.93828e+06
Staphylococcus	atpB	ATP synthase subunit a	NR	0	0	1	0.735	0.613	449	732	1051	0	-5.9383e+06
Staphylococcus	tgt	Queuine tRNA-ribosyltransferase	NR	0	0	0	0.676	0.47	537	1143	935	0	-5.93861e+06
Staphylococcus	yhaM	3'-5' exoribonuclease YhaM	NR	0	0	0	0.735	0.623	585	939	996	0	-5.93867e+06
Staphylococcus	?	hypothetical protein	NR	0	0	0	0.765	0.69	557	807	623	0	-5.93869e+06
Staphylococcus	?	Putative TrmH family tRNA/rRNA methyltransferase	NR	0	0	0	0.706	0.717	538	750	717	0	-5.93884e+06
Staphylococcus	ydcP_2	putative protease YdcP	NR	0	0	0	0.735	0.586	543	927	920	0	-5.93897e+06
Staphylococcus	purQ	Phosphoribosylformylglycinamidine synthase subunit PurQ	NR	0	0	0	0.735	0.553	370	669	686	0	-5.93901e+06
Staphylococcus	?	TelA-like protein	NR	1	0	0	0.735	0.685	900	1314	824	0	-5.93924e+06
Staphylococcus	fmt	Methionyl-tRNA formyltransferase	NR	0	0	0	0.735	0.653	613	939	692	0	-5.93932e+06
Staphylococcus	nth	Endonuclease III	NR	0	0	0	0.765	0.613	412	672	840	0	-5.93932e+06
Staphylococcus	cca	CCA-adding enzyme	NR	0	1	0	0.824	0.796	970	1218	843	0	-5.93955e+06
Staphylococcus	rnz	Ribonuclease Z	NR	0	1	0	0.735	0.701	646	921	866	0	-5.93966e+06
Staphylococcus	tcyP	L-cystine uptake protein TcyP	NR	0	0	0	0.706	0.619	862	1392	1001	0	-5.93969e+06
Staphylococcus	pckA	Phosphoenolpyruvate carboxykinase [ATP]	NR	1	0	0	0.765	0.612	980	1602	989	0	-5.93987e+06
Staphylococcus	ftsY	Signal recognition particle receptor FtsY	NR	0	0	0	0.735	0.548	853	1557	761	0	-5.94008e+06
Staphylococcus	hisS	Histidine--tRNA ligase	NR	1	0	0	0.794	0.593	761	1284	930	0	-5940143
Staphylococcus	dnaN	DNA polymerase III subunit beta	NR	1	0	0	0.706	0.481	545	1134	1132	0	-5.94015e+06
Staphylococcus	salA	Iron-sulfur cluster carrier protein	NR	0	0	0	0.676	0.547	588	1074	1062	0	-5.94031e+06
Staphylococcus	tmk	Thymidylate kinase	NR	0	0	0	0.676	0.682	434	636	1153	0	-5.94037e+06
Staphylococcus	cdaA	Cyclic di-AMP synthase CdaA	NR	0	0	1	0.765	0.519	453	873	1060	0	-5.94055e+06
Staphylococcus	glmM	Phosphoglucosamine mutase	NR	1	0	0	0.676	0.528	728	1380	678	0	-5.94056e+06
Staphylococcus	?	hypothetical protein	NR	0	1	0	0.706	0.649	1095	1686	754	0	-5.94056e+06
Staphylococcus	purF	Amidophosphoribosyltransferase	NR	0	0	1	0.706	0.661	989	1497	688	0	-5.94057e+06
Staphylococcus	der	GTPase Der	NR	0	0	0	0.735	0.497	650	1308	768	0	-5.94059e+06
Staphylococcus	rsmG	Ribosomal RNA small subunit methyltransferase G	NR	0	0	0	0.735	0.639	470	735	1136	0	-5.94061e+06
Staphylococcus	dnaX_1	DNA polymerase III subunit tau	NR	1	0	0	0.706	0.628	1139	1815	927	0	-5.94074e+06
Staphylococcus	purL	Phosphoribosylformylglycinamidine synthase subunit PurL	NR	0	1	0	0.676	0.556	1216	2187	687	0	-5940770
Staphylococcus	rsmD	Ribosomal RNA small subunit methyltransferase D	NR	0	0	0	0.794	0.649	364	561	712	0	-5.94091e+06
Staphylococcus	rplA	50S ribosomal protein L1	CR	0	0	0	0.676	0.355	280	789	1187	0	-5.94093e+06
Staphylococcus	betA	Oxygen-dependent choline dehydrogenase	NR	1	0	0	0.706	0.546	945	1731	1123	0	-5941001
Staphylococcus	pdxS	Pyridoxal 5'-phosphate synthase subunit PdxS	NR	0	0	0	0.676	0.452	400	885	1174	0	-5.94105e+06
Staphylococcus	tsf	Elongation factor Ts	NR	0	0	0	0.706	0.481	426	885	775	0	-5.94112e+06
Staphylococcus	pyrF	Orotidine 5'-phosphate decarboxylase	NR	0	1	0	0.676	0.644	460	714	745	0	-5.94119e+06
Staphylococcus	plsY	Glycerol-3-phosphate acyltransferase	NR	0	0	0	0.794	0.628	388	618	816	0	-5.94123e+06
Staphylococcus	scpB	Segregation and condensation protein B	NR	0	0	0	0.735	0.731	408	558	861	0	-5.94127e+06
Staphylococcus	yigZ	IMPACT family member YigZ	NR	0	0	1	0.735	0.671	435	648	1222	0	-5.94132e+06
Staphylococcus	nos	Nitric oxide synthase oxygenase	NR	0	1	0	0.765	0.707	768	1086	1020	0	-5.94133e+06
Staphylococcus	ansA	putative L-asparaginase	NR	0	0	0	0.735	0.657	645	981	859	0	-5.9415e+06
Staphylococcus	dnaB	Replication initiation and membrane attachment protein	NR	0	0	0	0.765	0.799	1216	1521	954	0	-5.9415e+06
Staphylococcus	purN	Phosphoribosylglycinamide formyltransferase	NR	0	0	0	0.765	0.716	408	570	691	0	-5.94176e+06
Staphylococcus	ispE	4-diphosphocytidyl-2-C-methyl-D-erythritol kinase	NR	0	0	0	0.765	0.615	589	957	807	0	-5.94189e+06
Staphylococcus	nrnA	Bifunctional oligoribonuclease and PAP phosphatase NrnA	NR	1	0	0	0.706	0.596	703	1179	960	0	-5.94208e+06
Staphylococcus	hflX	GTPase HflX	NR	0	1	0	0.706	0.689	910	1320	800	0	-5.94228e+06
Staphylococcus	rsmA	Ribosomal RNA small subunit methyltransferase A	NR	0	0	0	0.735	0.598	544	909	1161	0	-5.94251e+06
Staphylococcus	trmD	tRNA (guanine-N(1)-)-methyltransferase	NR	0	0	0	0.794	0.614	455	741	765	0	-5.94253e+06
Staphylococcus	modA	Molybdate-binding periplasmic protein	NR	0	0	0	0.765	0.718	638	888	1109	0	-5.94255e+06
Staphylococcus	tilS	tRNA(Ile)-lysidine synthase	NR	1	0	0	0.765	0.815	1098	1347	1169	0	-5.94261e+06
Staphylococcus	atpC	ATP synthase epsilon chain	NR	0	0	1	0.794	0.679	277	408	1046	0	-5.94265e+06
Staphylococcus	mgsR	Regulatory protein MgsR	NR	0	0	1	0.588	0.658	233	354	652	0	-5.94277e+06
Staphylococcus	pheS	Phenylalanine--tRNA ligase alpha subunit	NR	0	0	0	0.676	0.549	586	1068	719	0	-5.9428e+06
Staphylococcus	odh	Opine dehydrogenase	NR	1	0	0	0.735	0.627	677	1080	1113	0	-5.94281e+06
Staphylococcus	rplY	50S ribosomal protein L25	CR	0	0	0	0.706	0.501	389	777	1165	0	-5.94287e+06
Staphylococcus	?	Cobalt-dependent inorganic pyrophosphatase	NR	0	0	0	0.735	0.674	888	1317	962	0	-5.94295e+06
Staphylococcus	rpiA	Ribose-5-phosphate isomerase A	NR	0	0	1	0.706	0.757	538	711	1115	0	-5.943e+06
Staphylococcus	mecA	Adapter protein MecA 1	NR	0	0	0	0.765	0.644	491	762	648	0	-5.94342e+06
Staphylococcus	plsC	1-acyl-sn-glycerol-3-phosphate acyltransferase	NR	0	0	0	0.706	0.708	459	648	971	0	-5943558
Staphylococcus	rsmC	Ribosomal RNA small subunit methyltransferase C	NR	0	0	0	0.676	0.573	421	735	903	0	-5.94359e+06
Staphylococcus	?	hypothetical protein	NR	0	0	0	0.794	0.82	438	534	941	0	-5.94372e+06
Staphylococcus	?	hypothetical protein	NR	0	0	0	0.735	0.49	559	1140	1215	0	-5.94383e+06
Staphylococcus	dnaD	DNA replication protein DnaD	NR	0	0	0	0.647	0.761	541	711	841	0	-5.94383e+06
Staphylococcus	?	hypothetical protein	NR	0	0	1	0.735	0.76	367	483	969	0	-5.94388e+06
Staphylococcus	hisC_1	Histidinol-phosphate aminotransferase	NR	0	0	0	0.706	0.732	782	1068	674	0	-5.944e+06
Staphylococcus	sucD	Succinyl-CoA ligase [ADP-forming] subunit alpha	NR	0	0	0	0.706	0.435	398	915	770	0	-5.94408e+06
Staphylococcus	?	hypothetical protein	NR	0	0	0	0.735	0.717	413	576	837	0	-5.94418e+06
Staphylococcus	traP	Signal transduction protein TRAP	NR	0	0	0	0.735	0.835	451	540	993	0	-5.94425e+06
Staphylococcus	sufB_2	FeS cluster assembly protein SufB	NR	1	0	0	0.735	0.403	564	1398	620	0	-5.94428e+06
Staphylococcus	23S	23S rRNA gene	rRNA	0	0	1	0.618	0.118	345	2928	1166	0	-5944385
Staphylococcus	mobA	putative molybdenum cofactor guanylyltransferase	NR	0	1	0	0.706	0.802	493	615	1103	0	-5.94444e+06
Staphylococcus	?	hypothetical protein	NR	0	0	1	0.647	0.78	358	459	709	0	-5.9445e+06
Staphylococcus	ychF	Ribosome-binding ATPase YchF	NR	0	0	0	0.735	0.51	560	1098	802	0	-5.94453e+06
Staphylococcus	eno	Enolase	NR	1	0	0	0.706	0.474	621	1311	607	0	-5.94454e+06
Staphylococcus	tdk	Thymidine kinase	NR	0	0	0	0.706	0.589	355	603	1054	0	-5.94457e+06
Staphylococcus	?	hypothetical protein	NR	0	0	0	0.735	0.782	899	1149	970	0	-5.94467e+06
Staphylococcus	folD	Bifunctional protein FolD protein	NR	0	0	0	0.676	0.563	483	858	682	0	-5.94491e+06
Staphylococcus	pta	Phosphate acetyltransferase	NR	0	0	0	0.706	0.557	550	987	872	0	-5.94504e+06
Staphylococcus	groL	60 kDa chaperonin	NR	1	0	0	0.735	0.475	772	1626	1026	0	-5.9451e+06
Staphylococcus	?	hypothetical protein	NR	0	0	0	0.735	0.686	578	843	1147	0	-5.94511e+06
Staphylococcus	rsmH	Ribosomal RNA small subunit methyltransferase H	NR	0	0	0	0.706	0.574	536	933	730	0	-5.94521e+06
Staphylococcus	hprK	HPr kinase/phosphorylase	NR	0	0	0	0.735	0.555	556	1002	596	0	-5.94527e+06
Staphylococcus	mdtH	Multidrug resistance protein MdtH	NR	0	0	0	0.735	0.644	794	1233	981	0	-5.94535e+06
Staphylococcus	prs	Ribose-phosphate pyrophosphokinase	NR	0	0	1	0.794	0.465	462	993	1164	0	-5945411
Staphylococcus	?	hypothetical protein	NR	0	0	0	0.735	0.61	293	480	676	0	-5.94548e+06
Staphylococcus	?	hypothetical protein	NR	0	0	1	0.676	0.576	159	276	704	0	-5.94558e+06
Staphylococcus	rpmE2	50S ribosomal protein L31 type B	CR	0	0	1	0.706	0.391	102	261	1055	0	-5.94569e+06
Staphylococcus	?	hypothetical protein	NR	0	0	0	0.676	0.885	207	234	1207	0	-5.94575e+06
Staphylococcus	rplI	50S ribosomal protein L9	CR	0	0	1	0.676	0.533	243	456	1127	0	-5.94579e+06
Staphylococcus	glyQS	Glycine--tRNA ligase	NR	1	0	0	0.706	0.458	637	1392	892	0	-5.94652e+06
Staphylococcus	gatB_2	Aspartyl/glutamyl-tRNA(Asn/Gln) amidotransferase subunit B	NR	0	0	0	0.706	0.459	655	1428	1012	0	-5.94655e+06
Staphylococcus	?	NADH dehydrogenase-like protein	NR	1	0	0	0.676	0.538	697	1296	631	0	-5.94676e+06
Staphylococcus	prmC	Release factor glutamine methyltransferase	NR	0	0	1	0.706	0.809	711	879	904	0	-5.94691e+06
Staphylococcus	recO	DNA repair protein RecO	NR	0	0	0	0.706	0.769	600	780	893	0	-5946930
Staphylococcus	rbgA	Ribosome biogenesis GTPase A	NR	0	0	0	0.706	0.576	537	933	767	0	-5.94701e+06
Staphylococcus	rsmI	Ribosomal RNA small subunit methyltransferase I	NR	0	0	0	0.676	0.664	608	915	1159	0	-5.94715e+06
Staphylococcus	?	Putative esterase	NR	0	0	0	0.676	0.69	331	480	815	0	-5.94731e+06
Staphylococcus	trmB	tRNA (guanine-N(7)-)-methyltransferase	NR	0	0	0	0.706	0.655	436	666	976	0	-5947550
Staphylococcus	lipM	Octanoyltransferase LipM	NR	0	0	0	0.676	0.593	491	828	667	0	-5.94757e+06
Staphylococcus	cysS	Cysteine--tRNA ligase	NR	0	0	0	0.618	0.553	776	1404	1181	0	-5.94759e+06
Staphylococcus	leuD	3-isopropylmalate dehydratase small subunit	NR	0	0	0	0.735	0.624	369	591	1036	0	-5.94772e+06
Staphylococcus	pyrR	Bifunctional protein PyrR	NR	0	0	1	0.706	0.554	339	612	740	0	-5.94786e+06
Staphylococcus	ftsZ	Cell division protein FtsZ	NR	1	0	0	0.676	0.413	502	1215	734	0	-5.94803e+06
Staphylococcus	?	5-formyltetrahydrofolate cyclo-ligase	NR	0	0	0	0.647	0.743	459	618	885	0	-5.94803e+06
Staphylococcus	?	hypothetical protein	NR	0	1	0	0.676	0.743	823	1107	888	0	-5948063
Staphylococcus	?	hypothetical protein	NR	0	0	0	0.735	0.659	445	675	735	0	-5.94813e+06
Staphylococcus	?	Glucosaminate ammonia-lyase	NR	0	0	0	0.647	0.566	565	999	600	0	-5.94831e+06
Staphylococcus	aroF	Phospho-2-dehydro-3-deoxyheptonate aldolase	NR	0	0	0	0.735	0.532	589	1107	973	0	-5.94833e+06
Staphylococcus	divIVA	Septum site-determining protein DivIVA	NR	0	0	0	0.765	0.651	525	807	739	0	-5.94851e+06
Staphylococcus	rpsH	30S ribosomal protein S8	CR	0	0	1	0.676	0.354	140	396	1083	0	-5.94854e+06
Staphylococcus	pepS	Aminopeptidase PepS	NR	1	0	0	0.676	0.72	901	1251	1007	0	-5.94855e+06
Staphylococcus	comK	Competence transcription factor	NR	0	0	0	0.676	0.809	575	711	669	0	-5948795
Staphylococcus	coaE	Dephospho-CoA kinase	NR	0	0	0	0.676	0.7	443	633	955	0	-5.949e+06
Staphylococcus	mtnN	5'-methylthioadenosine/S-adenosylhomocysteine nucleosidase	NR	0	0	0	0.676	0.698	488	699	916	0	-5949084
Staphylococcus	rex	Redox-sensing transcriptional repressor Rex	NR	0	0	0	0.706	0.643	444	690	1030	0	-5.94913e+06
Staphylococcus	obg	GTPase Obg	NR	0	0	0	0.765	0.555	723	1302	801	0	-5.9492e+06
Staphylococcus	aroB	3-dehydroquinate synthase	NR	0	0	0	0.676	0.767	835	1089	848	0	-5.94924e+06
Staphylococcus	asd	Aspartate-semialdehyde dehydrogenase	NR	0	0	0	0.735	0.584	576	987	820	0	-5.94938e+06
Staphylococcus	glpP	Glycerol uptake operon antiterminator regulatory protein	NR	0	0	0	0.647	0.697	372	534	798	0	-5.94946e+06
Staphylococcus	rutB	Peroxyureidoacrylate/ureidoacrylate amidohydrolase RutB	NR	0	0	0	0.647	0.697	389	558	1021	0	-5.94947e+06
Staphylococcus	znuB	High-affinity zinc uptake system membrane protein ZnuB	NR	0	0	0	0.647	0.602	538	894	887	0	-5.94962e+06
Staphylococcus	rsfS	Ribosomal silencing factor RsfS	NR	0	0	1	0.676	0.669	249	372	913	0	-5.95019e+06
Staphylococcus	yjbK	Putative triphosphatase YjbK	NR	0	0	1	0.647	0.791	477	603	651	0	-5.95019e+06
Staphylococcus	btuF	Vitamin B12-binding protein	NR	0	0	0	0.676	0.745	706	948	1067	0	-5.95032e+06
Staphylococcus	?	hypothetical protein	NR	0	0	0	0.676	0.878	553	630	877	0	-5.9504e+06
Staphylococcus	ydjM	Inner membrane protein YdjM	NR	0	0	0	0.706	0.757	393	519	1066	0	-5950412
Staphylococcus	?	hypothetical protein	NR	0	0	0	0.765	0.587	585	996	819	0	-5.95044e+06
Staphylococcus	rnhC	Ribonuclease HIII	NR	0	0	0	0.735	0.723	711	984	720	0	-5.9507e+06
Staphylococcus	rplD	50S ribosomal protein L4	CR	0	0	0	0.676	0.467	290	621	1095	0	-5.9507e+06
Staphylococcus	?	hypothetical protein	NR	0	0	1	0.647	0.615	179	291	627	0	-5.95082e+06
Staphylococcus	rsgA	Putative ribosome biogenesis GTPase RsgA	NR	0	0	0	0.618	0.704	615	873	752	0	-5.95091e+06
Staphylococcus	rpsC	30S ribosomal protein S3	CR	0	0	0	0.647	0.353	231	654	1090	0	-5.95091e+06
Staphylococcus	yabA	Initiation-control protein YabA	NR	0	0	1	0.618	0.638	289	453	1156	0	-5.95103e+06
Staphylococcus	adk	Adenylate kinase	NR	0	0	0	0.647	0.484	315	651	1076	0	-5.95113e+06
Staphylococcus	?	hypothetical protein	NR	1	0	0	0.706	0.656	360	549	979	0	-5.95139e+06
Staphylococcus	sucC	Succinyl-CoA ligase [ADP-forming] subunit beta	NR	0	0	0	0.676	0.446	519	1164	769	0	-5.9514e+06
Staphylococcus	?	hypothetical protein	NR	0	0	0	0.676	0.416	735	1767	783	0	-5.95141e+06
Staphylococcus	agrA	Accessory gene regulator protein A	NR	0	0	0	0.676	0.621	447	720	1029	0	-5.95151e+06
Staphylococcus	rplB	50S ribosomal protein L2	CR	0	0	0	0.647	0.406	340	837	1093	0	-5.95151e+06
Staphylococcus	pyrG	CTP synthase	NR	1	0	0	0.706	0.522	844	1617	1056	0	-5.95161e+06
Staphylococcus	?	hypothetical protein	NR	0	0	0	0.706	0.517	498	963	982	0	-5.95162e+06
Staphylococcus	nudF	ADP-ribose pyrophosphatase	NR	0	0	1	0.676	0.709	385	543	864	0	-5.95173e+06
Staphylococcus	mcsA	Protein-arginine kinase activator protein	NR	0	0	1	0.647	0.68	445	654	1177	0	-5951790
Staphylococcus	folK	2-amino-4-hydroxy-6- hydroxymethyldihydropteridine pyrophosphokinase	NR	0	0	1	0.647	0.757	370	489	1173	0	-5.95195e+06
Staphylococcus	dtd	D-aminoacyl-tRNA deacylase	NR	0	0	0	0.618	0.665	313	471	931	0	-5.95197e+06
Staphylococcus	hemC	Porphobilinogen deaminase	NR	0	0	0	0.647	0.617	576	933	946	0	-5.95197e+06
Staphylococcus	thiE	Thiamine-phosphate synthase	NR	0	0	0	0.618	0.748	487	651	1043	0	-5.95204e+06
Staphylococcus	?	hypothetical protein	NR	0	0	0	0.735	0.553	733	1326	1203	0	-5.95224e+06
Staphylococcus	purK	N5-carboxyaminoimidazole ribonucleotide synthase	NR	0	0	0	0.735	0.659	757	1149	684	0	-5.95242e+06
Staphylococcus	?	hypothetical protein	NR	0	0	0	0.676	0.786	1077	1371	595	0	-5.95254e+06
Staphylococcus	ydcP_1	putative protease YdcP	NR	0	0	0	0.647	0.531	678	1278	919	0	-5952569
Staphylococcus	truA	tRNA pseudouridine synthase A	NR	0	0	0	0.676	0.661	547	828	1069	0	-5.95268e+06
Staphylococcus	?	Putative peptidyl-prolyl cis-trans isomerase	NR	0	0	0	0.765	0.562	339	603	638	0	-5.95273e+06
Staphylococcus	proS	Proline--tRNA ligase	NR	1	0	0	0.647	0.621	1058	1704	780	0	-5.95283e+06
Staphylococcus	?	hypothetical protein	NR	0	0	1	0.706	0.585	186	318	1220	0	-5.95289e+06
Staphylococcus	?	hypothetical protein	NR	0	0	0	0.706	0.532	289	543	1204	0	-5.9529e+06
Staphylococcus	?	hypothetical protein	NR	0	0	0	0.618	0.62	506	816	649	0	-5.95293e+06
Staphylococcus	?	hypothetical protein	NR	0	1	0	0.618	0.622	506	813	1155	0	-5.95295e+06
Staphylococcus	mazF	Endoribonuclease MazF	NR	0	0	1	0.706	0.484	180	372	1039	0	-5.95305e+06
Staphylococcus	sdhC	Succinate dehydrogenase cytochrome b558 subunit	NR	0	0	0	0.676	0.571	401	702	726	0	-5.95308e+06
Staphylococcus	rpsS	30S ribosomal protein S19	CR	0	0	1	0.676	0.402	111	276	1092	0	-5.95316e+06
Staphylococcus	?	hypothetical protein	NR	0	0	0	0.618	0.714	493	690	1213	0	-5.95328e+06
Staphylococcus	ribU	Riboflavin transporter RibU	NR	0	0	0	0.618	0.697	393	564	860	0	-5.95332e+06
Staphylococcus	?	hypothetical protein	NR	1	0	1	0.618	0.486	407	837	974	0	-5.95333e+06
Staphylococcus	rplE	50S ribosomal protein L5	CR	0	0	1	0.676	0.397	213	537	1084	0	-5.95347e+06
Staphylococcus	lipL	Octanoyl-[GcvH]:protein N-octanoyltransferase	NR	0	0	0	0.588	0.634	542	855	1200	0	-5.95395e+06
Staphylococcus	nadE	NH(3)-dependent NAD(+) synthetase	NR	0	0	0	0.618	0.653	558	855	1018	0	-5.95414e+06
Staphylococcus	rplO	50S ribosomal protein L15	CR	0	0	1	0.676	0.432	189	438	1078	0	-5.95415e+06
Staphylococcus	5S	5S rRNA gene	rRNA		0	1	0.206	0.208	25	120	NA	0	-5.95419e+06
Staphylococcus	?	hypothetical protein	NR	0	0	1	0.647	0.682	364	534	1183	0	-5.9543e+06
Staphylococcus	?	hypothetical protein	NR	0	0	1	0.676	0.778	509	654	845	0	-5.9543e+06
Staphylococcus	?	hypothetical protein	NR	0	0	0	0.706	0.822	587	714	945	0	-5.95438e+06
Staphylococcus	?	hypothetical protein	NR	1	0	0	0.676	0.813	234	288	661	0	-5.95442e+06
Staphylococcus	?	hypothetical protein	NR	0	0	0	0.706	0.697	529	759	917	0	-5954455
Staphylococcus	?	hypothetical protein	NR	0	0	0	0.588	0.626	434	693	963	0	-5.9545e+06
Staphylococcus	folE2	GTP cyclohydrolase FolE2	NR	0	0	0	0.735	0.571	502	879	1195	0	-5.95473e+06
Staphylococcus	?	hypothetical protein	NR	0	0	1	0.618	0.468	153	327	1154	0	-5.95481e+06
Staphylococcus	?	hypothetical protein	NR	0	0	0	0.618	0.635	457	720	1064	0	-5954982
Staphylococcus	?	Putative heme-dependent peroxidase	NR	0	0	0	0.676	0.615	469	762	1201	0	-5.95504e+06
Staphylococcus	?	hypothetical protein	NR	0	0	1	0.676	0.731	533	729	900	0	-5.95515e+06
Staphylococcus	rpsK	30S ribosomal protein S11	CR	0	0	1	0.735	0.302	117	387	1072	0	-5.95536e+06
Staphylococcus	?	hypothetical protein	NR	0	0	0	0.647	0.778	770	990	898	0	-5.95545e+06
Staphylococcus	hemB	Delta-aminolevulinic acid dehydratase	NR	0	0	0	0.706	0.534	524	981	944	0	-5.95548e+06
Staphylococcus	korB	2-oxoglutarate oxidoreductase subunit KorB	NR	0	1	0	0.676	0.505	436	864	795	0	-5.9558e+06
Staphylococcus	?	hypothetical protein	NR	0	0	1	0.647	0.635	160	252	1131	0	-5.95584e+06
Staphylococcus	?	hypothetical protein	NR	0	0	0	0.676	0.744	288	387	711	0	-5.95601e+06
Staphylococcus	upp	Uracil phosphoribosyltransferase	NR	0	0	0	0.647	0.504	316	627	1052	0	-5.95609e+06
Staphylococcus	rbfA	Ribosome-binding factor A	NR	0	0	0	0.647	0.59	207	351	786	0	-5.95621e+06
Staphylococcus	?	hypothetical protein	NR	0	0	0	0.676	0.469	467	996	899	0	-5956229
Staphylococcus	frr	Ribosome-recycling factor	NR	0	0	0	0.676	0.589	325	552	777	0	-5.95648e+06
Staphylococcus	pgsA	CDP-diacylglycerol--glycerol-3-phosphate 3-phosphatidyltransferase	NR	0	0	0	0.676	0.585	342	585	791	0	-5.95692e+06
Staphylococcus	nadD	putative nicotinate-nucleotide adenylyltransferase	NR	0	0	0	0.647	0.725	435	600	914	0	-5.95693e+06
Staphylococcus	?	hypothetical protein	NR	0	0	1	0.618	0.616	342	555	626	0	-5.95717e+06
Staphylococcus	moaB	Molybdenum cofactor biosynthesis protein B	NR	0	0	0	0.647	0.694	375	540	1108	0	-5.95732e+06
Staphylococcus	menA	1,4-dihydroxy-2-naphthoate octaprenyltransferase	NR	0	0	0	0.676	0.625	585	936	670	0	-5957317
Staphylococcus	rlmH	Ribosomal RNA large subunit methyltransferase H	NR	0	0	0	0.559	0.506	275	543	1124	0	-5.95737e+06
Staphylococcus	?	hypothetical protein	NR	0	0	1	0.647	0.772	366	474	1217	0	-5957393
Staphylococcus	def1	Peptide deformylase 1	NR	0	0	0	0.706	0.75	369	492	701	0	-5.9576e+06
Staphylococcus	moeZ	putative adenylyltransferase/sulfurtransferase MoeZ	NR	1	0	0	0.706	0.604	232	384	879	0	-5.9577e+06
Staphylococcus	scpA	Segregation and condensation protein A	NR	0	0	0	0.618	0.663	505	762	862	0	-5.95785e+06
Staphylococcus	pth	Peptidyl-tRNA hydrolase	NR	0	0	1	0.735	0.607	346	570	654	0	-5.95801e+06
Staphylococcus	?	hypothetical protein	NR	0	0	1	0.706	0.706	411	582	715	0	-5.95815e+06
Staphylococcus	?	hypothetical protein	NR	1	0	0	0.618	0.459	234	510	1196	0	-5.95822e+06
Staphylococcus	frdB	Fumarate reductase iron-sulfur subunit	NR	0	0	0	0.618	0.49	437	891	727	0	-5.95845e+06
Staphylococcus	?	hypothetical protein	NR	0	0	0	0.676	0.638	704	1104	857	0	-5.95849e+06
Staphylococcus	rimP	Ribosome maturation factor RimP	NR	0	0	0	0.618	0.581	298	513	782	0	-5.95875e+06
Staphylococcus	?	hypothetical protein	NR	0	0	0	0.706	0.929	446	480	1042	0	-5.95891e+06
Staphylococcus	kapB	Kinase-associated lipoprotein B	NR	0	0	0	0.676	0.74	284	384	637	0	-5.95901e+06
Staphylococcus	dagK	Diacylglycerol kinase	NR	0	0	0	0.706	0.587	608	1035	1011	0	-5.95903e+06
Staphylococcus	lipA_1	Lipoyl synthase	NR	0	0	1	0.676	0.449	422	939	625	0	-5.95904e+06
Staphylococcus	coaD	Phosphopantetheine adenylyltransferase	NR	0	0	0	0.647	0.626	310	495	713	0	-5.95936e+06
Staphylococcus	rplJ	50S ribosomal protein L10	CR	0	0	1	0.647	0.488	252	516	1188	0	-5.95937e+06
Staphylococcus	cmk	Cytidylate kinase	NR	1	0	0	0.647	0.582	438	753	858	0	-5.95953e+06
Staphylococcus	?	hypothetical protein	NR	0	0	0	0.588	0.576	460	798	794	0	-5.95961e+06
Staphylococcus	murG	UDP-N-acetylglucosamine--N-acetylmuramyl- (pentapeptide) pyrophosphoryl-undecaprenol N-acetylglucosamine transferase	NR	0	0	0	0.735	0.67	730	1089	657	0	-5.95988e+06
Staphylococcus	truB	tRNA pseudouridine synthase B	NR	0	1	0	0.559	0.707	653	924	787	0	-5.96008e+06
Staphylococcus	aroD	3-dehydroquinate dehydratase	NR	0	0	0	0.647	0.811	642	792	611	0	-5.96028e+06
Staphylococcus	ltaA	putative glycolipid permease LtaA	NR	0	0	0	0.647	0.66	822	1245	655	0	-5.96032e+06
Staphylococcus	?	hypothetical protein	NR	0	0	0	0.676	0.684	322	471	1032	0	-5.96061e+06
Staphylococcus	sufU	Zinc-dependent sulfurtransferase SufU	NR	0	0	1	0.618	0.504	236	468	621	0	-5960607
Staphylococcus	rplM	50S ribosomal protein L13	CR	0	0	1	0.588	0.423	184	435	1068	0	-5.96105e+06
Staphylococcus	trmK	tRNA (adenine(22)-N(1))-methyltransferase	NR	0	0	0	0.647	0.763	538	705	889	0	-5.96109e+06
Staphylococcus	ktrA	Ktr system potassium uptake protein A	NR	0	0	1	0.647	0.483	335	693	700	0	-5.96111e+06
Staphylococcus	moaE	Molybdopterin synthase catalytic subunit	NR	0	0	0	0.647	0.602	280	465	1105	0	-5.96124e+06
Staphylococcus	ndk	Nucleoside diphosphate kinase	NR	0	0	0	0.618	0.524	275	525	850	0	-5.96146e+06
Staphylococcus	rnhB	Ribonuclease HII	NR	0	0	0	0.676	0.735	604	822	721	0	-5.96157e+06
Staphylococcus	?	hypothetical protein	NR	0	0	0	0.618	0.588	187	318	939	0	-5.96172e+06
Staphylococcus	?	Pesticidal crystal protein Cry22Aa	NR	0	0	0	0.618	0.431	389	903	681	0	-5.96182e+06
Staphylococcus	?	hypothetical protein	NR	0	0	0	0.706	0.737	617	837	738	0	-5.96191e+06
Staphylococcus	16S	16S rRNA gene	rRNA	0	0	1	0.647	0.094	141	1502	NA	0	-5.96194e+06
Staphylococcus	serS	Serine--tRNA ligase	NR	1	1	0	0.588	0.57	733	1287	1129	0	-5.96201e+06
Staphylococcus	?	hypothetical protein	NR	0	0	1	0.588	0.46	251	546	1185	0	-5.96241e+06
Staphylococcus	?	hypothetical protein	NR	0	0	0	0.588	0.576	368	639	1053	0	-5.96248e+06
Staphylococcus	uppS	Isoprenyl transferase	NR	0	0	0	0.765	0.637	493	774	778	0	-5.96258e+06
Staphylococcus	rnmV	Ribonuclease M5	NR	0	0	0	0.618	0.648	373	576	615	0	-5.9627e+06
Staphylococcus	?	hypothetical protein	NR	0	0	1	0.676	0.531	247	465	1000	0	-5.96281e+06
Staphylococcus	?	hypothetical protein	NR	0	0	1	0.618	0.527	139	264	1162	0	-5.96287e+06
Staphylococcus	rimM	Ribosome maturation factor RimM	NR	0	0	0	0.618	0.637	327	513	764	0	-5.96295e+06
Staphylococcus	dtd3	D-aminoacyl-tRNA deacylase	NR	0	0	0	0.618	0.511	426	834	1160	0	-5.9631e+06
Staphylococcus	rlmL	Ribosomal RNA large subunit methyltransferase L	NR	0	0	0	0.647	0.613	706	1152	835	0	-5.96324e+06
Staphylococcus	?	hypothetical protein	NR	0	0	1	0.618	0.759	337	444	796	0	-5.96332e+06
Staphylococcus	queG	Epoxyqueuosine reductase	NR	0	0	0	0.647	0.545	659	1209	1002	0	-5.96404e+06
Staphylococcus	yhhQ	Inner membrane protein YhhQ	NR	0	0	0	0.676	0.606	433	714	833	0	-5.96407e+06
Staphylococcus	ywiB	putative beta-barrel protein YwiB	NR	0	0	0	0.588	0.727	338	465	1205	0	-5.96426e+06
Staphylococcus	spxA	Regulatory protein Spx	NR	0	0	1	0.588	0.303	120	396	614	0	-5964292
Staphylococcus	zapA	Cell division protein ZapA	NR	0	0	1	0.618	0.704	190	270	722	0	-5.965e+06
Staphylococcus	?	Putative phosphoesterase	NR	0	0	0	0.618	0.686	350	510	618	0	-5.96506e+06
Staphylococcus	groS	10 kDa chaperonin	NR	0	0	1	0.647	0.639	182	285	1027	0	-5.96532e+06
Staphylococcus	ilvC	Ketol-acid reductoisomerase	NR	0	0	0	0.706	0.551	554	1005	1035	0	-5965349
Staphylococcus	?	hypothetical protein	NR	0	0	0	0.588	0.826	612	741	1223	0	-5.96574e+06
Staphylococcus	secG	putative protein-export membrane protein SecG	NR	0	0	1	0.647	0.509	119	234	608	0	-5.96586e+06
Staphylococcus	?	putative transcriptional regulatory protein	NR	0	0	0	0.588	0.561	402	717	1214	0	-5966108
Staphylococcus	smpB	SsrA-binding protein	NR	0	0	0	0.588	0.573	270	471	610	0	-5.96625e+06
Staphylococcus	hslV	ATP-dependent protease subunit HslV	NR	0	0	1	0.618	0.517	281	543	772	0	-5.9664e+06
Staphylococcus	ilvH	Acetolactate synthase small subunit	NR	0	0	1	0.588	0.794	381	480	1034	0	-5966414
Staphylococcus	?	hypothetical protein	NR	0	0	0	0.529	0.669	267	399	875	0	-5.96678e+06
Staphylococcus	rsbW	Serine-protein kinase RsbW	NR	0	0	0	0.559	0.582	281	483	1037	0	-5.96701e+06
Staphylococcus	purE	N5-carboxyaminoimidazole ribonucleotide mutase	NR	0	0	0	0.618	0.553	277	501	683	0	-5967018
Staphylococcus	erpA	Iron-sulfur cluster insertion protein ErpA	NR	0	0	1	0.588	0.512	212	414	633	0	-5.96714e+06
Staphylococcus	rplP	50S ribosomal protein L16	CR	0	0	1	0.676	0.285	123	432	1089	0	-5.96725e+06
Staphylococcus	ctsR	Transcriptional regulator CtsR	NR	0	0	1	0.618	0.579	271	468	1176	0	-5.9674e+06
Staphylococcus	proC	Pyrroline-5-carboxylate reductase	NR	0	0	0	0.588	0.603	503	834	865	0	-5.96764e+06
Staphylococcus	tyrS	Tyrosine--tRNA ligase	NR	0	0	0	0.676	0.584	738	1263	972	0	-5.96769e+06
Staphylococcus	ccpN	Transcriptional repressor CcpN	NR	0	0	1	0.676	0.62	411	663	891	0	-5.96805e+06
Staphylococcus	?	hypothetical protein	NR	0	0	0	0.618	0.583	500	858	663	0	-5.96808e+06
Staphylococcus	hup	DNA-binding protein HU	NR	0	0	1	0.735	0.337	91	270	854	0	-5.9681e+06
Staphylococcus	bioY	Biotin transporter BioY	NR	0	0	1	0.559	0.742	425	573	1111	0	-5.96815e+06
Staphylococcus	?	hypothetical protein	NR	0	0	1	0.588	0.524	195	372	998	0	-5.96832e+06
Staphylococcus	guaA	GMP synthase [glutamine-hydrolyzing]	NR	1	0	0	0.588	0.431	664	1542	1144	0	-5.96866e+06
Staphylococcus	gpsB	Cell cycle protein GpsB	NR	0	0	1	0.618	0.565	205	363	836	0	-5.96867e+06
Staphylococcus	comGC	ComG operon protein 3	NR	0	0	1	0.559	0.672	234	348	883	0	-5.96876e+06
Staphylococcus	thyA	Thymidylate synthase	NR	0	0	0	0.618	0.585	558	954	832	0	-5.9688e+06
Staphylococcus	?	hypothetical protein	NR	1	0	0	0.529	0.724	1041	1437	1142	0	-5.96885e+06
Staphylococcus	?	hypothetical protein	NR	0	0	0	0.559	0.644	201	312	808	0	-5.9689e+06
Staphylococcus	?	hypothetical protein	NR	0	0	0	0.618	0.796	516	648	846	0	-5.9689e+06
Staphylococcus	?	hypothetical protein	NR	0	0	1	0.618	0.811	331	408	642	0	-5.96954e+06
Staphylococcus	maa	Maltose O-acetyltransferase	NR	0	0	1	0.618	0.708	410	579	598	0	-5.96958e+06
Staphylococcus	?	hypothetical protein	NR	0	0	1	0.676	0.658	233	354	613	0	-5.96975e+06
Staphylococcus	rpsL	30S ribosomal protein S12	CR	0	0	1	0.588	0.364	154	423	1192	0	-5.96998e+06
Staphylococcus	ung	Uracil-DNA glycosylase	NR	0	0	0	0.647	0.579	389	672	1197	0	-5.96999e+06
Staphylococcus	?	hypothetical protein	NR	0	0	0	0.676	0.764	227	297	810	0	-5.97033e+06
Staphylococcus	rplS	50S ribosomal protein L19	CR	0	0	1	0.559	0.402	141	351	766	0	-5.97058e+06
Staphylococcus	?	hypothetical protein	NR	0	0	1	0.618	0.615	214	348	762	0	-5.97068e+06
Staphylococcus	sepF	Cell division protein SepF	NR	0	0	1	0.618	0.614	468	762	736	0	-5.97078e+06
Staphylococcus	divIC	Cell division protein DivIC	NR	0	0	1	0.706	0.665	307	462	1168	0	-5.97118e+06
Staphylococcus	?	hypothetical protein	NR	0	0	0	0.618	0.625	208	333	1010	0	-5.97183e+06
Staphylococcus	fdhD	Sulfurtransferase FdhD	NR	0	0	0	0.676	0.631	545	864	1110	0	-5972442
Staphylococcus	rpoE	putative DNA-directed RNA polymerase subunit delta	NR	0	0	0	0.559	0.58	357	615	1057	0	-5.97251e+06
Staphylococcus	rsbV	Anti-sigma-B factor antagonist	NR	0	0	1	0.588	0.581	190	327	1038	0	-5.97261e+06
Staphylococcus	?	hypothetical protein	NR	0	0	0	0.529	0.779	243	312	1216	0	-5.97262e+06
Staphylococcus	mraZ	Transcriptional regulator MraZ	NR	0	0	1	0.676	0.457	196	429	729	0	-5.97288e+06
Staphylococcus	yjbI	Group 2 truncated hemoglobin YjbI	NR	0	0	0	0.588	0.544	243	447	650	0	-5.97338e+06
Staphylococcus	?	Non-canonical purine NTP pyrophosphatase	NR	0	0	0	0.647	0.673	404	600	728	0	-5.97363e+06
Staphylococcus	trxA_1	Thioredoxin	NR	0	0	1	0.559	0.644	230	357	616	0	-5.97367e+06
Staphylococcus	agrB	Accessory gene regulator protein B	NR	0	0	0	0.588	0.775	495	639	1028	0	-5.97368e+06
Staphylococcus	?	hypothetical protein	NR	0	0	0	0.559	0.879	522	594	853	0	-5.9739e+06
Staphylococcus	?	hypothetical protein	NR	0	0	1	0.588	0.73	162	222	830	0	-5.97439e+06
Staphylococcus	recR	Recombination protein RecR	NR	0	0	0	0.647	0.467	279	597	1151	0	-5.97448e+06
Staphylococcus	engB	putative GTP-binding protein EngB	NR	0	0	0	0.5	0.569	360	633	894	0	-5974594
Staphylococcus	fumC	Fumarate hydratase class II	NR	0	0	0	0.618	0.523	725	1386	641	0	-5.9746e+06
Staphylococcus	tag	DNA-3-methyladenine glycosylase 1	NR	0	0	1	0.588	0.772	461	597	943	0	-5.97476e+06
Staphylococcus	?	hypothetical protein	NR	0	0	0	0.529	0.781	178	228	878	0	-5.97567e+06
Staphylococcus	?	hypothetical protein	NR	0	0	1	0.647	0.587	148	252	632	0	-5.9757e+06
Staphylococcus	folB	Dihydroneopterin aldolase	NR	0	0	0	0.559	0.618	230	372	1172	0	-5.97577e+06
Staphylococcus	rnhA	14.7 kDa ribonuclease H-like protein	NR	0	0	1	0.559	0.706	339	480	834	0	-5.97589e+06
Staphylococcus	?	hypothetical protein	NR	0	0	0	0.588	0.775	314	405	838	0	-5.9759e+06
Staphylococcus	?	hypothetical protein	NR	0	0	1	0.5	0.575	157	273	924	0	-5.97591e+06
Staphylococcus	gatC_2	Aspartyl/glutamyl-tRNA(Asn/Gln) amidotransferase subunit C	NR	0	0	1	0.559	0.647	194	300	1013	0	-5.97603e+06
Staphylococcus	?	hypothetical protein	NR	0	0	1	0.588	0.727	216	297	737	0	-5.97606e+06
Staphylococcus	?	hypothetical protein	NR	0	0	1	0.647	0.512	315	615	1211	0	-5.97629e+06
Staphylococcus	tsaE	tRNA threonylcarbamoyladenosine biosynthesis protein TsaE	NR	0	0	0	0.618	0.553	332	600	1033	0	-5.97632e+06
Staphylococcus	rpsF	30S ribosomal protein S6	CR	0	0	1	0.559	0.536	164	306	1140	0	-5977245
Staphylococcus	rpsU	30S ribosomal protein S21	CR	0	0	1	0.529	0.322	56	174	901	0	-5.97725e+06
Staphylococcus	sepA	Multidrug resistance efflux pump SepA	NR	0	0	0	0.588	0.735	357	486	1063	0	-5.97778e+06
Staphylococcus	rplN	50S ribosomal protein L14	CR	0	0	1	0.618	0.333	122	366	1086	0	-5.97884e+06
Staphylococcus	?	Putative esterase	NR	0	0	1	0.588	0.696	282	405	636	0	-5.97894e+06
Staphylococcus	menC	o-succinylbenzoate synthase	NR	0	0	0	0.588	0.849	871	1026	991	0	-5.97929e+06
Staphylococcus	tadA	tRNA-specific adenosine deaminase	NR	0	0	0	0.559	0.716	363	507	987	0	-5.9795e+06
Staphylococcus	?	hypothetical protein	NR	0	1	0	0.618	0.823	459	558	863	0	-5.97982e+06
Staphylococcus	rpsE	30S ribosomal protein S5	CR	0	0	1	0.588	0.382	190	498	1080	0	-5.97997e+06
Staphylococcus	?	hypothetical protein	NR	0	0	0	0.559	0.563	262	465	910	0	-5.98026e+06
Staphylococcus	pyrE	Orotate phosphoribosyltransferase	NR	0	0	0	0.588	0.609	371	609	746	0	-5.98122e+06
Staphylococcus	?	Putative membrane protein insertion efficiency factor	NR	0	0	0	0.647	0.644	174	270	990	0	-5.98182e+06
Staphylococcus	rplGA	putative ribosomal protein YlxQ	NR	0	0	1	0.529	0.728	236	324	785	0	-5.98216e+06
Staphylococcus	yrrK	Putative pre-16S rRNA nuclease	NR	0	0	0	0.559	0.552	240	435	923	0	-5.98254e+06
Staphylococcus	?	hypothetical protein	NR	0	0	1	0.529	0.764	204	267	710	0	-5.98272e+06
Staphylococcus	?	hypothetical protein	NR	0	0	0	0.559	0.71	443	624	1116	0	-5.98331e+06
Staphylococcus	?	hypothetical protein	NR	0	0	0	0.529	0.556	210	378	1202	0	-5.98333e+06
Staphylococcus	aroA	3-phosphoshikimate 1-carboxyvinyltransferase	NR	0	0	1	0.559	0.778	1097	1410	847	0	-5984301
Staphylococcus	msrC	Free methionine-R-sulfoxide reductase	NR	0	0	0	0.588	0.717	344	480	967	0	-5.98439e+06
Staphylococcus	?	hypothetical protein	NR	0	0	0	0.529	0.532	190	357	922	0	-5.9844e+06
Staphylococcus	ptpB	Low molecular weight protein-tyrosine-phosphatase PtpB	NR	0	0	1	0.559	0.828	370	447	1009	0	-5.98443e+06
Staphylococcus	?	putative tautomerase	NR	0	0	1	0.588	0.651	123	189	817	0	-5.98444e+06
Staphylococcus	msrB	Peptide methionine sulfoxide reductase MsrB	NR	0	0	0	0.588	0.5	219	438	831	0	-5.98499e+06
Staphylococcus	rnpA	Ribonuclease P protein component	NR	0	0	0	0.618	0.613	215	351	1135	0	-5.9858e+06
Staphylococcus	mobB	Molybdopterin-guanine dinucleotide biosynthesis adapter protein	NR	1	0	0	0.559	0.816	421	516	1106	0	-5.98606e+06
Staphylococcus	rpoB	DNA-directed RNA polymerase subunit beta	rpo	0	0	0	0.82	0.41	1441	3552	748	0	-5.98616e+06
Staphylococcus	?	hypothetical protein	NR	0	0	1	0.647	0.631	299	474	708	0	-5.98783e+06
Staphylococcus	moaD	Molybdopterin synthase sulfur carrier subunit	NR	0	0	1	0.618	0.74	171	231	1104	0	-5.98855e+06
Staphylococcus	?	hypothetical protein	NR	0	0	0	0.588	0.614	577	939	1041	0	-5.98861e+06
Staphylococcus	acpS	Holo-[acyl-carrier-protein] synthase	NR	0	0	0	0.5	0.698	287	411	1040	0	-5.98937e+06
Staphylococcus	?	putative AAA domain-containing protein	NR	0	0	0	0.588	0.591	766	1296	646	0	-5.98941e+06
Staphylococcus	rplK	50S ribosomal protein L11	CR	0	0	1	0.529	0.322	136	423	1186	0	-5.98954e+06
Staphylococcus	atpF	ATP synthase subunit b	NR	1	0	0	0.5	0.586	311	531	1049	0	-5.98961e+06
Staphylococcus	?	hypothetical protein	NR	0	0	0	0.559	0.778	168	216	647	0	-5.98994e+06
Staphylococcus	rpsP	30S ribosomal protein S16	CR	0	0	1	0.559	0.496	137	276	763	0	-5.9905e+06
Staphylococcus	hpt	Hypoxanthine-guanine phosphoribosyltransferase	NR	0	0	0	0.559	0.571	310	543	1170	0	-5.99122e+06
Staphylococcus	greA	Transcription elongation factor GreA	NR	0	0	1	0.618	0.502	241	480	918	0	-5.99126e+06
Staphylococcus	qoxD	Quinol oxidase subunit 4	NR	0	0	1	0.618	0.564	164	291	680	0	-5991327
Staphylococcus	?	hypothetical protein	NR	0	0	0	0.588	0.623	142	228	988	0	-5.99162e+06
Staphylococcus	rplQ	50S ribosomal protein L17	CR	0	0	1	0.529	0.465	180	387	1070	0	-5.99267e+06
Staphylococcus	pyrH	Uridylate kinase	NR	0	0	1	0.559	0.402	311	774	776	0	-5.99306e+06
Staphylococcus	ptsH	Phosphocarrier protein HPr	NR	0	0	1	0.471	0.386	102	264	698	0	-5993170
Staphylococcus	era	GTPase Era	NR	0	0	0	0.529	0.529	476	900	855	0	-5.99361e+06
Staphylococcus	efp	Elongation factor P	NR	1	0	0	0.529	0.48	269	561	876	0	-5.99376e+06
Staphylococcus	?	hypothetical protein	NR	0	0	0	0.618	0.612	771	1260	803	0	-5.99462e+06
Staphylococcus	tuf	Elongation factor Tu	NR	1	0	0	0.471	0.29	344	1188	662	0	-5.99515e+06
Staphylococcus	rpsD	30S ribosomal protein S4	CR	0	0	0	0.529	0.433	261	603	968	0	-5.99595e+06
Staphylococcus	?	hypothetical protein	NR	0	0	1	0.559	0.664	253	381	1199	0	-5.99633e+06
Staphylococcus	comEA	ComE operon protein 1	NR	0	0	0	0.471	0.702	674	960	912	0	-5.99765e+06
Staphylococcus	rpsO	30S ribosomal protein S15	CR	0	0	1	0.441	0.408	109	267	789	0	-5.99767e+06
Staphylococcus	rpsM	30S ribosomal protein S13	CR	0	0	1	0.618	0.385	142	369	1073	0	-5.9979e+06
Staphylococcus	?	hypothetical protein	NR	0	0	1	0.5	0.701	162	231	1045	0	-5.99882e+06
Staphylococcus	mrp	Iron-sulfur cluster carrier protein	NR	0	0	1	0.559	0.48	147	306	645	0	-5.99887e+06
Staphylococcus	?	hypothetical protein	NR	0	0	1	0.471	0.621	218	351	1005	0	-5998981
Staphylococcus	?	hypothetical protein	NR	0	0	0	0.529	0.524	176	336	784	0	-5.99959e+06
Staphylococcus	hfq	RNA-binding protein Hfq	NR	0	0	1	0.529	0.707	176	249	799	0	-5.99978e+06
Staphylococcus	yccX	Acylphosphatase	NR	0	0	1	0.529	0.795	217	273	822	0	-6.00087e+06
Staphylococcus	pitA_2	L-methionine sulfoximine/L-methionine sulfone acetyltransferase	NR	0	0	1	0.529	0.883	461	522	604	0	-6.00114e+06
Staphylococcus	?	hypothetical protein	NR	0	0	1	0.529	0.464	85	183	666	0	-6.00139e+06
Staphylococcus	?	hypothetical protein	NR	0	0	1	0.529	0.682	176	258	1158	0	-6.00175e+06
Staphylococcus	ribH	6,7-dimethyl-8-ribityllumazine synthase	NR	0	0	0	0.5	0.551	266	483	984	0	-6.00392e+06
Staphylococcus	rpsG	30S ribosomal protein S7	CR	0	0	1	0.529	0.312	146	468	1193	0	-6.00399e+06
Staphylococcus	?	hypothetical protein	NR	0	0	1	0.471	0.773	357	462	1058	0	-6.00543e+06
Staphylococcus	?	hypothetical protein	NR	0	0	0	0.559	0.74	304	411	839	0	-6.00661e+06
Staphylococcus	rplGB	Ribosome-associated protein L7Ae-like protein	NR	0	0	1	0.529	0.67	177	264	1191	0	-6.0078e+06
Staphylococcus	?	hypothetical protein	NR	0	0	0	0.5	0.641	298	465	818	0	-6.00823e+06
Staphylococcus	mrnC	Mini-ribonuclease 3	NR	0	0	0	0.529	0.651	283	435	1182	0	-6.00845e+06
Staphylococcus	?	Nucleoid-associated protein	NR	0	0	1	0.5	0.307	126	411	1150	0	-6.00896e+06
Staphylococcus	rplX	50S ribosomal protein L24	CR	0	0	0	0.471	0.415	132	318	1085	0	-6.01024e+06
Staphylococcus	?	hypothetical protein	NR	0	0	0	0.441	0.616	732	1188	1145	0	-6.01111e+06
Staphylococcus	?	hypothetical protein	NR	0	0	1	0.441	0.788	175	222	1008	0	-6.01193e+06
Staphylococcus	nrdH	Glutaredoxin-like protein NrdH	NR	0	0	1	0.529	0.736	181	246	699	0	-6.01248e+06
Staphylococcus	xseB	Exodeoxyribonuclease 7 small subunit	NR	0	0	1	0.471	0.717	185	258	873	0	-6.01342e+06
Staphylococcus	queF	NADPH-dependent 7-cyano-7-deazaguanine reductase	NR	0	0	0	0.529	0.469	235	501	1218	0	-6.01681e+06
Staphylococcus	nfuA	Fe/S biogenesis protein NfuA	NR	0	0	1	0.412	0.467	112	240	629	0	-6.0185e+06
Staphylococcus	?	hypothetical protein	NR	0	0	1	0.559	0.536	111	207	1184	0	-6.01878e+06
Staphylococcus	rplW	50S ribosomal protein L23	CR	0	0	1	0.441	0.467	129	276	1094	0	-6.02032e+06
Staphylococcus	apt	Adenine phosphoribosyltransferase	NR	0	0	0	0.529	0.505	262	519	933	0	-6.02127e+06
Staphylococcus	rplL	50S ribosomal protein L7/L12	CR	0	0	1	0.5	0.377	138	366	1189	0	-6.02234e+06
Staphylococcus	rplV	50S ribosomal protein L22	CR	0	0	1	0.471	0.336	127	378	1091	0	-6.02409e+06
Staphylococcus	rpsQ	30S ribosomal protein S17	CR	0	0	1	0.441	0.33	86	261	1087	0	-6026627
Staphylococcus	?	hypothetical protein	NR	0	0	0	0.5	0.536	148	276	1024	0	-6.02682e+06
Staphylococcus	?	hypothetical protein	NR	0	0	0	0.5	0.536	188	351	844	0	-6.0276e+06
Staphylococcus	?	hypothetical protein	NR	0	0	1	0.471	0.482	146	303	1016	0	-6.02799e+06
Staphylococcus	?	hypothetical protein	NR	0	0	0	0.441	0.61	130	213	1006	0	-6.02802e+06
Staphylococcus	bcp	Putative peroxiredoxin bcp	NR	0	0	0	0.5	0.645	302	468	965	0	-6.032e+06
Staphylococcus	acpP	Acyl carrier protein	NR	0	0	1	0.441	0.346	80	231	757	0	-6.03202e+06
Staphylococcus	rpsJ	30S ribosomal protein S10	CR	0	0	1	0.441	0.275	84	306	1097	0	-6.03505e+06
Staphylococcus	ybeY	Endoribonuclease YbeY	NR	0	0	0	0.5	0.633	302	477	896	0	-6.0379e+06
Staphylococcus	rplT	50S ribosomal protein L20	CR	0	0	1	0.441	0.389	147	378	951	0	-6.03908e+06
Staphylococcus	yhbY	RNA-binding protein YhbY	NR	0	0	1	0.471	0.639	188	294	915	0	-6041824
Staphylococcus	?	Phosphorylated carbohydrates phosphatase	NR	0	0	0	0.441	0.825	557	675	1114	0	-6.04417e+06
Staphylococcus	rpmI	50S ribosomal protein L35	CR	0	0	1	0.441	0.424	84	198	952	0	-6046124
Staphylococcus	rplU	50S ribosomal protein L21	CR	0	0	1	0.441	0.444	136	306	940	0	-6.04858e+06
Staphylococcus	rpoB*	Ogier et al. (2019) rpoB region	rpo	0	0	0	0.382	0.375	165	440	NA	0	-6049492
Staphylococcus	?	hypothetical protein	NR	0	0	0	0.5	0.702	139	198	1099	0	-6.05008e+06
Staphylococcus	?	hypothetical protein	NR	0	0	0	0.412	0.771	178	231	668	0	-6.05117e+06
Staphylococcus	?	hypothetical protein	NR	0	0	0	0.5	0.53	116	219	826	0	-6.05712e+06
Staphylococcus	?	hypothetical protein	NR	0	0	1	0.441	0.4	114	285	811	0	-6.05875e+06
Staphylococcus	infA	Translation initiation factor IF-1	NR	0	0	1	0.412	0.301	65	216	1075	0	-6.06094e+06
Staphylococcus	atpE	ATP synthase subunit c	NR	0	0	1	0.441	0.37	81	219	1050	0	-6.06188e+06
Staphylococcus	rpsR	30S ribosomal protein S18	CR	1	0	0	0.382	0.342	82	240	1141	0	-6.06718e+06
Staphylococcus	purS	Phosphoribosylformylglycinamidine synthase subunit PurS	NR	0	0	1	0.5	0.496	137	276	685	0	-6.07286e+06
Staphylococcus	?	hypothetical protein	NR	0	0	0	0.471	0.71	343	483	1198	0	-6078872
Staphylococcus	rpmA	50S ribosomal protein L27	CR	0	0	1	0.441	0.394	111	282	938	0	-6.08287e+06
Staphylococcus	?	hypothetical protein	NR	0	0	1	0.324	0.531	121	228	1139	0	-6.08755e+06
Staphylococcus	rpmF	50S ribosomal protein L32	CR	0	0	1	0.353	0.526	90	171	716	0	-6.09381e+06
Staphylococcus	rpmB	50S ribosomal protein L28	CR	0	0	1	0.382	0.366	68	186	753	0	-6097181
Staphylococcus	rpmD	50S ribosomal protein L30	CR	0	0	1	0.382	0.478	89	186	1079	0	-6.11773e+06
Staphylococcus	spoVG	Putative septation protein SpoVG	NR	0	0	1	0.441	0.442	163	369	1163	0	-6.12097e+06
Staphylococcus	?	hypothetical protein	NR	0	0	0	0.441	0.543	184	339	884	0	-6.12803e+06
Staphylococcus	rpmC	50S ribosomal protein L29	CR	0	0	1	0.353	0.357	76	213	1088	0	-6.16213e+06
Staphylococcus	rpmH	50S ribosomal protein L34	CR	0	0	1	0.353	0.296	40	135	1134	0	-6.17342e+06
Staphylococcus	rpmJ	50S ribosomal protein L36	CR	0	0	1	0.235	0.225	25	111	1074	0	-6.20538e+06
Staphylococcus	16S	16S V1-2	rRNA	0	0		0.324	0.167	32	192	NA	0	-6.23318e+06
Staphylococcus	16S	16S V3	rRNA		0		0.206	0.153	27	176	NA	0	-6.26724e+06
Staphylococcus	16S-Mask	16S V3-V4-Masked	rRNA	0	0		0.088	0.033	14	422	NA	0	-6.62203e+06
Staphylococcus	16S-Mask	16S V4-Mask	rRNA		0		0	0	0	259	NA	0	-6.62298e+06
Staphylococcus	16S	16S V6	rRNA		0		0.118	0.082	16	194	NA	0	-6.62343e+06
Staphylococcus	16S	16S V8	rRNA		0		0.118	0.094	16	171	NA	0	-6.71559e+06
Staphylococcus	16S	16S V3-V4	rRNA	0	0		0.294	0.089	40	448	NA	0	-6.72559e+06
Staphylococcus	16S	16S V7	rRNA		0		0.088	0.05	6	120	NA	0	-6.79464e+06
Staphylococcus	16S-Mask	16S rRNA gene-Masked	rRNA	0	0		0.44	0.03	38	1278	NA	0	-6.84983e+06
Staphylococcus	16S	16S V5	rRNA		0		0.059	0.033	4	121	NA	0	-6.86124e+06
Staphylococcus	16S	16S V9	rRNA		0		0.059	0.125	15	120	NA	0	-6.90015e+06
Staphylococcus	16S-Mask	16S V3-Masked	rRNA		0		0.059	0.045	7	156	NA	0	-6.903e+06
Staphylococcus	16S	16S V4	rRNA	0	0		0.088	0.051	14	272	NA	0	-6.92111e+06

## Sheet: Table S5
Title:	Average gene characteristics and proportion of positive recombination/HGT intra-genus level core genes for each gene category
Legend:	For the four gene categories CR, NR, rpo, and rRNA, as well as the three rRNA genes: average concordance, SNP count, SNP proportion, gene length and proportion of genes positive for HGT and/or recombination across the four genera.
	CR	NR	rpo (ABC)	rRNA	16S rRNA gene	23S rRNA gene	5S rRNA gene
Concordance (%)	0.534509	0.66033	0.812608	0.42326	0.507464	0.524401	0.209846
SNPs (%)	0.503731	0.659658	0.523773	0.228159	0.169701	0.227494	0.35079
SNPs (#)	218.403	603.964	1503.58	263.6	254.25	672.5	42.25
nt (#)	433.578	927.624	2894.58	1517.1	1498.5	2948.5	120.75
HGT/recombination (%)	0.43	0.4	0.5	0.83	1	0.75	0.75

## Sheet: Table S6
Title:	5-fold cross validation results for logistic regression and logarithmic models
Legend:	For all SNP count versus concordance scatter plots (core genes, core SNPs, NR SNPs, CR SNPs, NR 1-2 SNPs, CR 1-2 SNPs, NR 3 SNPs, CR 3 SNPs, rRNA SNPs, 16S SNPs, stem SNPs, and loop SNPs) for each intra-genus level genus: the sum squared error and sum absolute error of both logistic regression and logarithmic 5-fold cross-validation analyses.
	Sum squared error logistic regression	Sum squared error logarithmic	Sum absolute error logistic regression	Sum absolute error logarithmic
Campylobacter core genes	10.5298	9.72621	59.6295	57.8168
Campylobacter core SNPs	18.5404	14.6214	109.568	98.9266
Campylobacter NR 1-2 SNPs	12.8938	9.50231	87.8206	79.4803
Campylobacter NR 3 SNPs	11.02	7.46688	79.684	67.1264
Campylobacter CR 1-2 SNPs	12.4414	8.53036	83.3324	73.6431
Campylobacter CR 3 SNPs	13.8963	9.88701	91.3578	78.4142
Campylobacter rRNA SNPs	4.32555	3.57147	35.9023	32.7499
Campylobacter 16S SNPs	2.5857	2.25868	20.1048	19.0234
Campylobacter stem SNPs	1.37074	1.30879	10.8901	10.5387
Campylobacter loop SNPs	0.461613	0.527862	4.4015	4.68811
Campylobacter NR SNPs	13.4125	9.55246	84.7998	75.5359
Campylobacter CR SNPs	15.0181	11.9235	96.4717	88.0912
Legionella core genes	4.06367	2.68152	29.4993	25.5517
Legionella core SNPs	9.91122	5.24626	74.5963	55.8492
Legionella NR 1-2 SNPs	9.40762	3.97876	71.0312	49.0497
Legionella NR 3 SNPs	9.31109	4.62741	74.8508	53.6316
Legionella CR 1-2 SNPs	9.62172	4.22917	72.6891	51.0044
Legionella CR 3 SNPs	9.3401	5.02161	75.1112	55.3871
Legionella rRNA SNPs	2.51645	0.945298	26.7664	16.3823
Legionella 16S SNPs	0.7225	0.525131	9.61165	8.16748
Legionella loop SNPs	0.0907151	0.092273	1.92171	2.00229
Legionella NR SNPs	9.40769	4.63624	73.6183	52.9781
Legionella CR SNPs	8.83423	4.50612	71.7193	52.3439
Staphylococcus core genes	5.5001	4.02211	43.5922	39.0108
Staphylococcus core SNPs	9.18007	5.12465	70.9103	56.3657
Staphylococcus NR 1-2 SNPs	8.97578	4.39872	68.7082	52.2852
Staphylococcus NR 3 SNPs	9.0432	5.47345	73.7548	58.1345
Staphylococcus CR 1-2 SNPs	9.21877	4.24441	67.986	51.0095
Staphylococcus CR 3 SNPs	9.14752	4.64519	70.4583	54.1412
Staphylococcus rRNA SNPs	1.97694	0.98086	15.6776	11.7359
Staphylococcus 16S SNPs	0.579644	0.451776	6.02528	4.85233
Staphylococcus stem SNPs	0.264046	0.539682	3.95988	5.62382
Staphylococcus loop SNPs	0.305042	0.515701	4.26189	4.81565
Staphylococcus NR SNPs	9.27534	5.34997	72.1639	57.3432
Staphylococcus CR SNPs	9.64226	5.32816	74.561	58.3852
Clostridium core genes	1.97741	1.55817	11.4425	10.2678
Clostridium core SNPs	8.27066	4.18919	68.8369	49.5782
Clostridium NR 1-2 SNPs	8.51539	3.18094	66.4849	44.5521
Clostridium NR 3 SNPs	5.50433	4.2288	58.7184	50.2473
Clostridium CR 1-2 SNPs	10.0086	3.24106	70.0643	45.7064
Clostridium CR 3 SNPs	7.79317	2.56318	65.7128	38.5416
Clostridium rRNA SNPs	1.77027	0.675404	18.4056	11.1374
Clostridium 16S SNPs	0.913215	0.461335	9.13133	6.67248
Clostridium stem SNPs	0.242645	0.200601	4.15216	3.5713
Clostridium loop SNPs	0.173818	0.151965	3.17746	2.92605
Clostridium NR SNPs	8.48457	4.66216	70.9346	52.5684
Clostridium CR SNPs	8.08042	2.88067	62.1193	39.4583

## Sheet: Table S7
Title:	SNP metrics for genes with lowest concordance (lowest five and lowest ten).
Legend:	For each intra-genus level genus, the average concordance, SNP proportion, SNP count, and gene length for (i) five genes with the lowest concordance and (ii) ten genes with lowest score. Metrics were calculated for each gene separately, a five gene alignment concatenation, and a ten gene alignment concatenation.
Genus	Bottom 5/10 average/concatenated	Concordance (%)	SNPs (%)	SNPs (#)	nt (#)	Increase in SNPs	Increase in gene length
Campylobacter	Bottom 10 Average	0.299	0.622057	244.3	374.7	1.72772
Campylobacter	Bottom 10 Concatenated	0.6	0.651988	2443	3747	3.45545	3.1461
Campylobacter	Bottom 5 Average	0.268	0.576364	141.4	238.2
Campylobacter	Bottom 5 Concatenated	0.67	0.593619	707	1191
Clostridium	Bottom 10 Average	0.373	0.68202	602	854.7	1.17486
Clostridium	Bottom 10 Concatenated	0.47	0.702143	3800	5412	1.48322	1.50962
Clostridium	Bottom 5 Average	0.318	0.699376	512.4	717
Clostridium	Bottom 5 Concatenated	0.4	0.714644	2562	3585
Legionella	Bottom 10 Average	0.292	0.621074	144.8	236.4	1.01685
Legionella	Bottom 10 Concatenated	0.76	0.612521	1448	2364	2.03371	2.20728
Legionella	Bottom 5 Average	0.256	0.665569	142.4	214.2
Legionella	Bottom 5 Concatenated	0.64	0.664799	712	1071
Staphylococcus	Bottom 10 Average	0.357	0.388869	76.8	192.6	1.09091	1.12238
Staphylococcus	Bottom 10 Concatenated	0.74	0.398754	768	1926	2.18182
Staphylococcus	Bottom 5 Average	0.322	0.387069	70.4	171.6
Staphylococcus	Bottom 5 Concatenated	0.68	0.410256	352	858

[truncated: 6 more sheets: Table S8, Table S9, Table S10, Table S11, Table S12, Table S13]
